# Supplementary material for: Anatomical characterization of Cre driver mice for neural circuit mapping and manipulation
Source: Front Neural Circuits. 2014 Jul 10;8:76. doi: 10.3389/fncir.2014.00076 (PMC4091307; doi:10.3389/fncir.2014.00076)
Supplement: Supplementary file 1 [file DataSheet1.XLSX]

## Sheet: Supp. Table 1
Cre Line	Originating Lab (Donating Investigator)	Generation Method		Public Repository	Public Repository Stock #	Repository Strain Name	Data available through the Transgenic Portal	Expression Pattern Summary
A930038C07Rik-Tg1-Cre	Allen Institute for Brain Science	Transgenic	BAC	The Jackson Laboratory	017346	B6.Cg-Tg(A930038C07Rik-cre)1Aibs/J	http://connectivity.brain-map.org/transgenic/search?search_type=line-name&search_term=A930038C07Rik-Tg1-Cre	Widespread expression of reporter gene throughout the brain. Adult Cre expression observed in restricted populations of striatum, layer 5 neocortex, hypothalamus, pons and medulla. This is different from the A930038C07Rik gene itself which is specifically expressed in layer 1.
A930038C07Rik-Tg4-Cre	Allen Institute for Brain Science	Transgenic	BAC	The Jackson Laboratory	009616	B6;C3-Tg(A930038C07Rik-cre)4Aibs/J	http://connectivity.brain-map.org/transgenic/search?search_type=line-name&search_term=A930038C07Rik-Tg4-Cre	Scattered populations within cortical layers 4 and 5, septum, thalamus, and midbrain. In the cortex, unlike A930038C07Rik which is specifically expressed in layer 1, Cre-directed reporter expression is found enriched in a scattered population of cells in layer 5.
Adcyap1-2A-Cre	Allen Institute for Brain Science	Knock-in	T2A				http://connectivity.brain-map.org/transgenic/search?search_type=line-name&search_term=Adcyap1-2A-Cre	Cre expression is enriched in restricted populations within the olfactory areas, hippocampus, striatum, thalamus, midbrain, pons, and medulla. Expression is scattered within the isocortex and hypothalamus. Reporter expression is widespread.
Agrp-IRES-Cre	Brad Lowell	Knock-in	IRES	The Jackson Laboratory	012899	STOCK Agrptm1(cre)Lowl/J	http://connectivity.brain-map.org/transgenic/search?search_type=line-name&search_term=Agrp-IRES-Cre	Enriched in the arcuate nucleus of the hypothalamus.
Avp-IRES2-Cre	Allen Institute for Brain Science	Knock-in	IRES2	The Jackson Laboratory	023530	B6.Cg-Avptm1.1(cre)Hze/J	http://connectivity.brain-map.org/transgenic/search?search_type=line-name&search_term=Avp-IRES2-Cre	Expressed in restricted populations within the hypothalamus.
Calb2-CreERT2	Z. Josh Huang	Knock-in	Direct	The Jackson Laboratory	013730	B6(Cg)-Calb2tm2.1(cre/ERT2)Zjh/J	http://connectivity.brain-map.org/transgenic/search?search_type=line-name&search_term=Calb2-CreERT2	Expressed in restricted populations throughout the brain, including thalamus, hippocampus, midbrain, amygdala, cerebellum, hypothalamus, and olfactory bulb.
Calb2-IRES-Cre	Z. Josh Huang	Knock-in	IRES	The Jackson Laboratory	010774	B6(Cg)-Calb2tm1(cre)Zjh/J	http://connectivity.brain-map.org/transgenic/search?search_type=line-name&search_term=Calb2-IRES-Cre	Enriched in restricted populations within the olfactory areas, layer 2/3 and 4 of neocortex, cortical subplate (amygdala), hypothalamus, thalamus, hippocampus, pons, medulla, and cerebellum.
Camk2a-Cre	Susumu Tonegawa	Transgenic	Conventional	The Jackson Laboratory	005359	B6.Cg-Tg(Camk2a-cre)T29-1Stl/J	http://connectivity.brain-map.org/transgenic/search?search_type=line-name&search_term=Camk2a-Cre	Throughout the cortex, hippocampus, striatum, and other structures.
Camk2a-CreERT2	Allen Institute for Brain Science	Transgenic	Conventional	The Jackson Laboratory	012362	B6;129S6-Tg(Camk2a-cre/ERT2)1Aibs/J	http://connectivity.brain-map.org/transgenic/search?search_type=line-name&search_term=Camk2a-CreERT2	Sparse populations of neurons in the cortex, hippocampus, striatum, and other structures in the absence of tamoxifen. After tamoxifen administration, reporter gene expression is turned on in widespread populations of neurons in the same regions listed above.
Cart-Tg1-Cre	Allen Institute for Brain Science	Transgenic	BAC	The Jackson Laboratory	009615	STOCK Tg(Cartpt-cre)1Aibs/J	http://connectivity.brain-map.org/transgenic/search?search_type=line-name&search_term=Cart-Tg1-Cre	Reporter expression is widespread in cortex, and scattered in hippocampus, thalamus, hypothalamus, midbrain and cerebellum. Cre expression is in restricted and/or sparse populations within the hypothalamus and midbrain.
Cck-CreERT2	Z. Josh Huang	Knock-in	Direct	The Jackson Laboratory	012710	B6(Cg)-Ccktm2.1(cre/ERT2)Zjh/J	http://connectivity.brain-map.org/transgenic/search?search_type=line-name&search_term=Cck-CreERT2	Strong scattered expression in cortex, enriched expression in various cortical layers and the retrosplenial area. Strong sparse, scattered cells in hippocampus, thalamus, olfactory bulb, midbrain, pons, medulla, striatum, cerebellum, and hypothalamus.
Cck-IRES-Cre	Z. Josh Huang	Knock-in	IRES	The Jackson Laboratory	012706	STOCK Ccktm1.1(cre)Zjh/J	http://connectivity.brain-map.org/transgenic/search?search_type=line-name&search_term=Cck-IRES-Cre	Widespread expression in cortex, hippocampus and thalamus. Sparse, scattered expression elsewhere in the brain. Strong expression in Purkinje cell layer in cerebellum. Enriched in restricted populations in pons and medulla.
Cdhr1-Cre_KG66	Nathaniel Heintz and Charles Gerfen	Transgenic	BAC	MMRRC	036056	STOCK Tg(Pcdh21-cre)KG66Gsat/Mmcd	http://connectivity.brain-map.org/transgenic/search?search_type=line-name&search_term=Cdhr1-Cre_KG66	Enriched in the mitral and tufted cell layer within the olfactory bulb
Chat-IRES-Cre	Brad Lowell	Knock-in	IRES	The Jackson Laboratory	006410	B6;129S6-Chattm1(cre)Lowl/J	http://connectivity.brain-map.org/transgenic/search?search_type=line-name&search_term=Chat-IRES-Cre	Expressed in cholinergic neurons - restricted populations within the medulla, pons, thalamus, and midbrain; and in scattered cells within the striatum, basal forebrain, and a very sparse population of cells in the cortex.
Chat-IRES-CreER	Jeremy Nathans	Knock-in	IRES	The Jackson Laboratory	008364	B6;129-Chattm1(cre/ERT)Nat/J	http://connectivity.brain-map.org/transgenic/search?search_type=line-name&search_term=Chat-IRES-CreER	Expressed in very sparse, restricted populations within the pallidum (basal forebrain; medial septal nuclei) and hypothalamus
Chrna2-Cre_OE25	Nathaniel Heintz and Charles Gerfen	Transgenic	BAC	MMRRC	036502	STOCK Tg(Chrna2-cre)OE25Gsat/Mmucd	http://connectivity.brain-map.org/transgenic/search?search_type=line-name&search_term=Chrna2-Cre_OE25	Enriched in cortical layer 5. Also expressed in restricted populations throughout the brain, including olfactory areas, hippocampus, lateral septal complex, pallidum, thalamus, hypothalamus, midbrain, hindbrain, and cerebellum.
Chrnb4-Cre_OL57	Nathaniel Heintz and Charles Gerfen	Transgenic	BAC	MMRRC	036503	STOCK Tg(Chrnb4-cre)OL57Gsat/Mmcd	http://connectivity.brain-map.org/transgenic/search?search_type=line-name&search_term=Chrnb4-Cre_OL57	Cre expression is enriched in cortical layers 2/3 and 5, and the habenula. Reporter expression is widespread.
Cnnm2-Cre_KD18	Nathaniel Heintz and Charles Gerfen	Transgenic	BAC	MMRRC	030951	STOCK Tg(Cnnm2-cre)KD18Gsat/Mmucd	http://connectivity.brain-map.org/transgenic/search?search_type=line-name&search_term=Cnnm2-Cre_KD18	Reporter expression is widespread, scattered throughout the brain, enriched within the cortex, pons, striatum, and habenula. Cre expression is enriched in habenula.
Cort-T2A-Cre	Z. Josh Huang	Knock-in	T2A	The Jackson Laboratory	010910	STOCK Corttm1(cre)Zjh/J	http://connectivity.brain-map.org/transgenic/search?search_type=line-name&search_term=Cort-T2A-Cre	Scattered interneuron expression in cortex and hippocampus. Enriched in olfactory bulb.
Crh-IRES-Cre (BL)	Brad Lowell	Knock-in	IRES				http://connectivity.brain-map.org/transgenic/search?search_type=line-name&search_term=Crh-IRES-Cre (BL)	Enriched in restricted populations within the medulla, pons, hypothalamus, and thalamus. Scattered and restricted expression in neocortex.
Crh-IRES-Cre (ZJH)	Z. Josh Huang	Knock-in	IRES	The Jackson Laboratory	012704	B6(Cg)-Crhtm1(cre)Zjh/J	http://connectivity.brain-map.org/transgenic/search?search_type=line-name&search_term=Crh-IRES-Cre (ZJH)	Scattered expression in cortex. Enriched expression in piriform cortex, amygdala, hypothalamus, and thalamus.
Ctgf-Tg1-Cre	Allen Institute for Brain Science	Transgenic	BAC				http://connectivity.brain-map.org/transgenic/search?search_type=line-name&search_term=Ctgf-Tg1-Cre	Cre expression is enriched in cortical layer 6 and restricted populations within the cortical subplate, although reporter expression is widespread.
Ctgf-Tg2-Cre	Allen Institute for Brain Science	Transgenic	BAC	The Jackson Laboratory	008844	B6;C3-Tg(Ctgf-cre)2Aibs/J	http://connectivity.brain-map.org/transgenic/search?search_type=line-name&search_term=Ctgf-Tg2-Cre	Cre expression is enriched in layer 6b, although reporter expression is widespread, and in restricted populations within the cortical subplate and hypothalamus.
Cux2-Cre	Ulrich Mueller	Knock-in	Direct	MMRRC	032778	B6(Cg)-Cux2<tm2.1(cre)Mull>/Mmmh	http://connectivity.brain-map.org/transgenic/search?search_type=line-name&search_term=Cux2-Cre	Cre expression is enriched in cortical layers 2/3/4. Reporter expression is widespread.
Cux2-CreERT2	Ulrich Mueller	Knock-in	Direct	MMRRC	032779	B6(Cg)-Cux2<tm3.1(cre/ERT2)Mull>/Mmmh	http://connectivity.brain-map.org/transgenic/search?search_type=line-name&search_term=Cux2-CreERT2	Enriched in cortical layers 2/3/4, thalamus, midbrain, pons, medulla and cerebellum.
Cux2-IRES-Cre	Ulrich Mueller	Knock-in	IRES	MMRRC	031778	B6(Cg)-Cux2<tm1.1(cre)Mull>/Mmmh	http://connectivity.brain-map.org/transgenic/search?search_type=line-name&search_term=Cux2-IRES-Cre	Cre expression is enriched in cortical layers 2/3/4. Reporter expression is widespread.
Cyp39a1-Tg1-Cre	Allen Institute for Brain Science	Transgenic	BAC	The Jackson Laboratory	008839	B6;C3-Tg(Cyp39a1-cre)1Aibs/J	http://connectivity.brain-map.org/transgenic/search?search_type=line-name&search_term=Cyp39a1-Tg1-Cre	Scattered expression throughought the brain. Enriched in restricted populations within the hippocampus, cerebellum, pallidum, and olfactory areas.
Cyp39a1-Tg7-Cre	Allen Institute for Brain Science	Transgenic	BAC	The Jackson Laboratory	009117	B6;C3-Tg(Cyp39a1-cre)7Aibs/J	http://connectivity.brain-map.org/transgenic/search?search_type=line-name&search_term=Cyp39a1-Tg7-Cre	Cortex, hippocampus and cerebellum. In the cortex reporter expression is enriched in superficial layers 2/3. Cre expression is scattered throughout the brain and in restricted populations within the medulla and pons.
Dbh-Cre_KH212	Nathaniel Heintz and Charles Gerfen	Transgenic	BAC	MMRRC	032081	STOCK Tg(Dbh-cre)KH212Gsat/Mmcd	http://connectivity.brain-map.org/transgenic/search?search_type=line-name&search_term=Dbh-Cre_KH212	Expression in restricted populations within the pons.
Dbx1-IRES-Cre	Ulrich Mueller	Knock-in	IRES	MMRRC	031751	B6(Cg)-Dbx1tm1.1(cre)Mull/Mmmh	http://connectivity.brain-map.org/transgenic/search?search_type=line-name&search_term=Dbx1-IRES-Cre	Enriched in piriform cortex, cortical subplate, midbrain, pons, and medulla; and in restricted populations within the thalamus, hypothalamus, and cerebellum.
Dcx-Cre-35	Ulrich Mueller	Transgenic	Conventional	MMRRC	031752	C57BL/6J-Tg(DCX-cre)35Mull/Mmmh	http://connectivity.brain-map.org/transgenic/search?search_type=line-name&search_term=Dcx-Cre-35	Widespread expression throughout the brain.
Dcx-Cre-38	Ulrich Mueller	Transgenic	Conventional	MMRRC	031753	C57BL/6J-Tg(DCX-cre)38Mull/Mmmh	http://connectivity.brain-map.org/transgenic/search?search_type=line-name&search_term=Dcx-Cre-38	Widespread, scattered expression throughout the brain.
Dcx-CreERT2	Ulrich Mueller	Transgenic	Conventional	MMRRC	032780	C57BL/6J-Tg(DCX-cre/ERT2)1Mull/Mmmh	http://connectivity.brain-map.org/transgenic/search?search_type=line-name&search_term=Dcx-CreERT2	Widespread expression throughout the brain. Expressed in restricted populations in striatum, hippocampus, anterior olfactory nucleus, and cortex. Strong expression in the lateral ventricle.
Dlx1-CreERT2	Z. Josh Huang	Knock-in	Direct	The Jackson Laboratory	014551	B6;129S4-Dlx1tm1(cre/ERT2)Zjh/J	http://connectivity.brain-map.org/transgenic/search?search_type=line-name&search_term=Dlx1-CreERT2	Expressed in strong scattered cells throughout the brain. Expression is more widespread in olfactory bulb and cortical subplate (amygdala).
Dlx5-CreERT2	Z. Josh Huang	Knock-in	Direct	The Jackson Laboratory	010705	B6(Cg)-Dlx5tm1(cre/ERT2)Zjh/J	http://connectivity.brain-map.org/transgenic/search?search_type=line-name&search_term=Dlx5-CreERT2	Widespread, interneuron expression throughout cortex, striatum, amygdala, hippocampus, olfactory bulb, hypothalamus, and pallidum.
Drd1a-Cre	Richard Palmiter	Knock-in	Direct				http://connectivity.brain-map.org/transgenic/search?search_type=line-name&search_term=Drd1a-Cre	Reporter expression is throughout the cortex, hippocampus, striatum, and other structures. Cre expression is enriched in piriform cortex and striatum; and in restricted populations within the medulla, pons, and cerebellum.
Drd2-Cre_ER44	Nathaniel Heintz and Charles Gerfen	Transgenic	BAC	MMRRC	032108	B6.Cg-Tg(Drd2-cre)ER44Gsat/Mmcd	http://connectivity.brain-map.org/transgenic/search?search_type=line-name&search_term=Drd2-Cre_ER44	Enriched in striatum, restricted populations within cerebellum, cortex, thalamus, medulla, and olfactory areas.
Drd3-Cre_KI196	Nathaniel Heintz and Charles Gerfen	Transgenic	BAC	MMRRC	034610	STOCK Tg(Drd3-cre)KI196Gsat	http://connectivity.brain-map.org/transgenic/search?search_type=line-name&search_term=Drd3-Cre_KI196	Expressed in neuronal populations throughout the brain.
Efr3a-Cre_NO108	Nathaniel Heintz and Charles Gerfen	Transgenic	BAC	MMRRC	036660	STOCK Tg(Efr3a-cre)NO108Gsat/Mmucd	http://connectivity.brain-map.org/transgenic/search?search_type=line-name&search_term=Efr3a-Cre_NO108	Enriched in cortical layers 5 and 6a. Also enriched in restricted populations in the cortical subplate, thalamus, hypothalamus, medulla, pons, and cerebellum. Widespread, scattered expression in striatum and midbrain.
Emx1-IRES-Cre	Kevin Jones	Knock-in	IRES	The Jackson Laboratory	005628	B6.129S2-Emx1tm1(cre)Krj/J	http://connectivity.brain-map.org/transgenic/search?search_type=line-name&search_term=Emx1-IRES-Cre	Specific to the cortex and hippocampus.
Eno2-Cre	Judith Melki	Transgenic	Conventional	The Jackson Laboratory	005938	STOCK Tg(Eno2-cre)39Jme/J	http://connectivity.brain-map.org/transgenic/search?search_type=line-name&search_term=Eno2-Cre	Widespread, scattered expression throughout the brain.
Erbb4-2A-CreERT2	Allen Institute for Brain Science	Knock-in	F2A	The Jackson Laboratory	012360	B6.Cg-Erbb4tm1.1(cre/ERT2)Aibs/J	http://connectivity.brain-map.org/transgenic/search?search_type=line-name&search_term=Erbb4-2A-CreERT2	Scattered interneuron populations in cortex, hippocampus, and throughout the brain. Enriched in amygdala.
Esr1-2A-Cre	David Anderson	Knock-in	F2A				http://connectivity.brain-map.org/transgenic/search?search_type=line-name&search_term=Esr1-2A-Cre	Cre expression is restricted to specific populations within the hypothalamus.
Etv1-CreERT2	Z. Josh Huang	Knock-in	Direct	The Jackson Laboratory	013048	B6(Cg)-Etv1tm1.1(cre/ERT2)Zjh/J	http://connectivity.brain-map.org/transgenic/search?search_type=line-name&search_term=Etv1-CreERT2	Enriched in neocortical layer 5, and restricted populations within the cerebellum, thalamus, hippocampus, piriform cortex, and cortical subplate (amygdala)
Gabra6-IRES-Cre	William Wisden	Knock-in	IRES	MMRRC	015968	B6.129P2-Gabra6tm2(cre)Wwis/Mmcd	http://connectivity.brain-map.org/transgenic/search?search_type=line-name&search_term=Gabra6-IRES-Cre	Cre is enriched in granular cell layer of the cerebellum. Reporter expression is scattered, widespread throughout most brain areas.
Gabrr3-Cre_KC112	Nathaniel Heintz and Charles Gerfen	Transgenic	BAC	MMRRC	030709	STOCK Tg(Gabrr3-cre)KC112Gsat/Mmcd	http://connectivity.brain-map.org/transgenic/search?search_type=line-name&search_term=Gabrr3-Cre_KC112	Strong widespread expression throughout the brain. Highly enriched in cortical layer 6, dorsal thalamus, subthalamic nucleus, pontine gray and subregions of striatum, among other brain areas.
Gad2-CreERT2	Z. Josh Huang	Knock-in	Direct	The Jackson Laboratory	010702	STOCK Gad2tm1(cre/ERT2)Zjh/J	http://connectivity.brain-map.org/transgenic/search?search_type=line-name&search_term=Gad2-CreERT2	Strong widespread, scattered expression throughput the brain. Enriched expression in cortical subplate (amygdala), striatum, and olfactory bulb.
Gad2-IRES-Cre	Z. Josh Huang	Knock-in	IRES	The Jackson Laboratory	010802	STOCK Gad2tm2(cre)Zjh/J	http://connectivity.brain-map.org/transgenic/search?search_type=line-name&search_term=Gad2-IRES-Cre	Specific to GABAergic neurons. Enriched in the striatum, piriform cortex, and within restricted populations in the thalamus, hypothalamus, cerebellum, olfactory areas, and GABAergic interneurons of the cortex.
Gal-Cre_KI87	Nathaniel Heintz and Charles Gerfen	Transgenic	BAC	MMRRC	031060	STOCK Tg(Gal-cre)KI87Gsat/Mmcd	http://connectivity.brain-map.org/transgenic/search?search_type=line-name&search_term=Gal-Cre_KI87	Expressed in specific restricted populations within the medulla, pons, thalamus, and hypothalamus.
Gfap-Cre	Albee Messing	Transgenic	Conventional	The Jackson Laboratory	004600	FVB-Tg(GFAP-cre)25Mes/J	http://connectivity.brain-map.org/transgenic/search?search_type=line-name&search_term=Gfap-Cre	Reporter expression is throughout the cortex, hippocampus, cerebellum, striatum, and other regions in both neurons and glia. Cre expression is more scattered throughout the brain and in restricted populations within cerebellum.
Gng7-Cre_KH71	Nathaniel Heintz and Charles Gerfen	Transgenic	BAC	MMRRC	031181	STOCK Tg(Gng7-cre)KH71Gsat/Mmcd	http://connectivity.brain-map.org/transgenic/search?search_type=line-name&search_term=Gng7-Cre_KH71	Enriched in striatum and neocortical layers 2 and 5, and in restricted populations within the medulla, pons, midbrain, hippocampus, hypothalamus, thalamus, and olfactory areas.
Gnrh1-Cre	Catherine Dulac	Transgenic	BAC				http://connectivity.brain-map.org/transgenic/search?search_type=line-name&search_term=Gnrh1-Cre	Enriched in restricted populations within the hypothalamus and olfactory areas. Strong expression in scattered cells of the septum.
Gpr26-Cre_KO250	Nathaniel Heintz and Charles Gerfen	Transgenic	BAC	MMRRC	033032	STOCK Tg(Gpr26-cre)KO250Gsat/Mmucd	http://connectivity.brain-map.org/transgenic/search?search_type=line-name&search_term=Gpr26-Cre_KO250	Enriched in frontal cortex, layer 5 and 6b in other cortical regions, CA1 of hippocampus, subnuclei of the thalamus, and in cerebellar purkinje cells. Sparse expression in many other areas of the brain, including hindbrain, colliculus and striatum.
Grik4-Cre	Susumu Tonegawa	Transgenic	BAC	The Jackson Laboratory	006474	C57BL/6-Tg(Grik4-cre)G32-4Stl/J	http://connectivity.brain-map.org/transgenic/search?search_type=line-name&search_term=Grik4-Cre	Enriched in restricted populations within the hippocampus, cerebellum, cortical subplate (amygdala), medulla, pons, and thalamus.
Grm2-Cre_MR90	Nathaniel Heintz and Charles Gerfen	Transgenic	BAC	MMRRC	034611	STOCK Tg(Grm2-cre)MR90Gsat/Mmcd	http://connectivity.brain-map.org/transgenic/search?search_type=line-name&search_term=Grm2-Cre_MR90	Scattered, asymmetical expression of reporter gene throughout the brain at P28. Within the hippocampus, reporter expression is restricted to the dentate gyrus. At this age, cre expression is more restricted to areas including cortex, thalamus, superior colliculus and PAG.
Grp-Cre_KH288	Nathaniel Heintz and Charles Gerfen	Transgenic	BAC	MMRRC	031183	STOCK Tg(Grp-cre)KH288Gsat/Mmucd	http://connectivity.brain-map.org/transgenic/search?search_type=line-name&search_term=Grp-Cre_KH288	Enriched in layer 2/3 of frontal cortex. Expression in restricted populations in hippocampus, hypothalamus, thalamus and cerebellum.
Hdc-Cre_IM1	Nathaniel Heintz and Charles Gerfen	Transgenic	BAC	MMRRC	032079	STOCK Tg(Hdc-cre)IM1Gsat	http://connectivity.brain-map.org/transgenic/search?search_type=line-name&search_term=Hdc-Cre_IM1	Enriched in restricted populations of cells in the hypothalamus (tuberomammillary nucleus).
Htr2a-Cre_KM207	Nathaniel Heintz and Charles Gerfen	Transgenic	BAC	MMRRC	031150	STOCK Tg(Htr2a-cre)KM207Gsat/Mmucd	http://connectivity.brain-map.org/transgenic/search?search_type=line-name&search_term=Htr2a-Cre_KM207	Scattered expression throughout the brain. Enriched in layers 5 and 6b of cortex. Expression in restricted populations in septal complexes, hypothalamus and cerebellum.
Ins2-Cre	Mark Magnuson	Transgenic	Conventional	The Jackson Laboratory	003573	B6.Cg-Tg(Ins2-cre)25Mgn/J	http://connectivity.brain-map.org/transgenic/search?search_type=line-name&search_term=Ins2-Cre	Widespread expression in cerebral cortex, cerebral nuclei and hypothalamus. Scattered expression in pons and medulla. Little-to-no expression in midbrain, thalamus, and cerebellum.
Kcnc2-Cre	Susumu Tonegawa	Transgenic	Conventional	The Jackson Laboratory	008582	STOCK Tg(Kcnc2-Cre)K128Stl/LetJ	http://connectivity.brain-map.org/transgenic/search?search_type=line-name&search_term=Kcnc2-Cre	Enriched in piriform cortex, thalamus, and in restricted populations within the hippocampus, hypothalamus, cerebellum, and pons
Kiss1-Cre	Carol Elias	Transgenic	BAC				http://connectivity.brain-map.org/transgenic/search?search_type=line-name&search_term=Kiss1-Cre	Expression is enriched in specific nuclei of the hypothalamus (e.g. arcuate nucleus).
Lepr-IRES-Cre	Jeffrey Friedman	Knock-in	IRES	The Jackson Laboratory	008320	B6.129-Leprtm2(cre)Rck/J	http://connectivity.brain-map.org/transgenic/search?search_type=line-name&search_term=Lepr-IRES-Cre	Expressed in restricted populations within the hypothalamus.
Lhx6-CreERT2	Z. Josh Huang	Knock-in	Direct	The Jackson Laboratory	010776	B6(Cg)-Lhx6tm1(cre/ERT2)Zjh/J	http://connectivity.brain-map.org/transgenic/search?search_type=line-name&search_term=Lhx6-CreERT2	Sparse, scattered expression throughout brain. Enriched in restricted populations within the cortical subplate (amygdala), and pallidum
Lypd6-Cre_KL156	Nathaniel Heintz and Charles Gerfen	Transgenic	BAC				http://connectivity.brain-map.org/transgenic/search?search_type=line-name&search_term=Lypd6-Cre_KL156	Expressed in restricted populations within the hippocampus, thalamus, hypothalamus, midbrain, pons, and medulla.
Mybpc1-Cre	Allen Institute for Brain Science	Transgenic	BAC	The Jackson Laboratory	008848	B6;C3-Tg(Mybpc1-cre)2Aibs/J	http://connectivity.brain-map.org/transgenic/search?search_type=line-name&search_term=Mybpc1-Cre	Widespread, scattered expression in most brain areas. Enriched expression of reporter gene within restricted populations of olfactory areas (piriform cortex), isocortex, hippocampal formation, cerebellum, cortical subplate, and thalamus.
Nefh-Cre	Ashok Kulkarni	Transgenic	Conventional	The Jackson Laboratory	009102	STOCK Tg(Nefh-cre)12Kul/J	http://connectivity.brain-map.org/transgenic/search?search_type=line-name&search_term=Nefh-Cre	Widespread expression throughout the brain.
Nefl-IRES-CreER	Jeremy Nathans	Knock-in	IRES	The Jackson Laboratory	008363	B6;129-Nefltm1(cre/Esr1)Nat/J	http://connectivity.brain-map.org/transgenic/search?search_type=line-name&search_term=Nefl-IRES-CreER	Sparse, scattered expression in cortex and other areas. Enriched in specific populations within the medulla and pons.
Nes-Cre	Rüdiger Klein	Transgenic	Conventional	The Jackson Laboratory	003771	B6.Cg-Tg(Nes-cre)1Kln/J	http://connectivity.brain-map.org/transgenic/search?search_type=line-name&search_term=Nes-Cre	Widespread expression throughout the brain.
Nkx2-1-CreERT2	Z. Josh Huang	Knock-in	Direct	The Jackson Laboratory	014552	STOCK Nkx2-1tm1.1(cre/ERT2)Zjh/J	http://connectivity.brain-map.org/transgenic/search?search_type=line-name&search_term=Nkx2-1-CreERT2	Strong scattered cells in restricted populations throughout the brain including striatum, cortical subplate (amygdala), hippocampus, and hypothalamus. Expressed in choroid plexus.
Nos1-CreERT2	Z. Josh Huang	Knock-in	Direct	The Jackson Laboratory	014541	B6;129S-Nos1tm1.1(cre/ERT2)Zjh/J	http://connectivity.brain-map.org/transgenic/search?search_type=line-name&search_term=Nos1-CreERT2	Expressed in the molecular and granular layer in the cerebellum. Strong expression in the amygdala and olfactory bulb, particularly the accessory olfactory bulb, granular layer. Expressed in scattered cell populations in other brain regions.
Nr5a1-Cre	Brad Lowell	Transgenic	BAC	The Jackson Laboratory	006364	FVB-Tg(Nr5a1-cre)2Lowl/J	http://connectivity.brain-map.org/transgenic/search?search_type=line-name&search_term=Nr5a1-Cre	Expressed in restricted populations within the hypothalamus (ventromedial hypothalamus), and in cortical layer 4.
Ntsr1-Cre_GN220	Nathaniel Heintz and Charles Gerfen	Transgenic	BAC	MMRRC	030648	B6.FVB(Cg)-Tg(Ntsr1-cre)GN220Gsat/Mmucd	http://connectivity.brain-map.org/transgenic/search?search_type=line-name&search_term=Ntsr1-Cre_GN220	Specific to cortical layer 6 neurons.
Ntrk1-IRES-Cre	Louis F Reichardt	Knock-in	IRES	MMRRC	015500	B6;129S4-Ntrk1tm1(cre)Lfr/Mmucd	http://connectivity.brain-map.org/transgenic/search?search_type=line-name&search_term=Ntrk1-IRES-Cre	Sparse, scattered expression throughout subcortical brain regions. Enriched in restricted populations in the thalamus, hypothalamus, midbrain, pons, and medulla.
Nxph4-2A-CreERT2	Allen Institute for Brain Science	Knock-in	T2A	The Jackson Laboratory	022861	B6.Cg-Nxph4tm1.1(cre/ERT2)Hze/J	http://connectivity.brain-map.org/transgenic/search?search_type=line-name&search_term=Nxph4-2A-CreERT2	Strong expression in locus coeruleus and dorsal medial hypothalamus. Very sparse in other regions of hypothalamus, and layer 6b of cortex and other brain regions.
Otof-Cre	Ulrich Mueller	Knock-in	Direct	MMRRC	032781	B6(Cg)-Otoftm1.1(cre)Mull/Mmmh	http://connectivity.brain-map.org/transgenic/search?search_type=line-name&search_term=Otof-Cre	Sparse, scattered expression throughout the brain. Enriched in neocortical layer 6 and cingulate cortex, also in restricted populations within hippocampus, cortical subplate (amygdala)
Otof-CreERT2	Ulrich Mueller	Knock-in	Direct	MMRRC	032782	B6(Cg)-Otof<tm2.1(cre/ERT2)Mull>/Mmmh	http://connectivity.brain-map.org/transgenic/search?search_type=line-name&search_term=Otof-CreERT2	Low level scattered expression throughout the brain.
Oxt-IRES-Cre	Brad Lowell	Knock-in	IRES				http://connectivity.brain-map.org/transgenic/search?search_type=line-name&search_term=Oxt-IRES-Cre	Expressed in restricted populations within the hypothalamus (paraventricular and supraoptic nuclei).
Oxtr-Cre_ON66	Nathaniel Heintz and Charles Gerfen	Transgenic	BAC	MMRRC	036545	STOCK Tg(Oxtr-cre)ON66Gsat/Mmucd	http://connectivity.brain-map.org/transgenic/search?search_type=line-name&search_term=Oxtr-Cre_ON66	Widespread expression throughout most of the brain, except very sparse expression in the striatum and restricted populations within thalamus and cerebellum.
Pcdh9-Cre_NP276	Nathaniel Heintz and Charles Gerfen	Transgenic	BAC	MMRRC	036084	STOCK Tg(Pcdh9-cre)NP276Gsat/Mmcd	http://connectivity.brain-map.org/transgenic/search?search_type=line-name&search_term=Pcdh9-Cre_NP276	Strong expression in olfactory bulb, olfactory tubercle and striatum. Sparse cells in cortex, hypothalamus, and subregions of cerebellum, midbrain and hindbrain.
Pcp2-Cre (AM)	Andrew McMahon	Transgenic	Conventional	The Jackson Laboratory	006207	STOCK Tg(Pcp2-cre)1Amc/J	http://connectivity.brain-map.org/transgenic/search?search_type=line-name&search_term=Pcp2-Cre (AM)	Cre expression restricted to Purkinje cells in the cerebellum. Reporter expression also prominent in cerebellar Purkinje cells, and widely scattered throughout the brain (possibly glial cells) and enriched in the cortex and hippocampus.
Pcp2-Cre_GN135	Nathaniel Heintz and Charles Gerfen	Transgenic	BAC	MMRRC	030868	B6.Cg-Tg(Pcp2-cre)GN135Gsat/Mmucd	http://connectivity.brain-map.org/transgenic/search?search_type=line-name&search_term=Pcp2-Cre_GN135	Expressed in Purkinje cells within the cerebellum.
Pdzk1ip1-Cre_KD31	Nathaniel Heintz and Charles Gerfen	Transgenic	BAC	MMRRC	030851	STOCK Tg(Pdzk1ip1-cre)KD31Gsat/Mmucd	http://connectivity.brain-map.org/transgenic/search?search_type=line-name&search_term=Pdzk1ip1-Cre_KD31	In restricted populations within the thalamus, midbrain, pons, and medulla.
Penk-2A-CreERT2	Allen Institute for Brain Science	Knock-in	F2A	The Jackson Laboratory	022862	B6.Cg-Penktm1.1(cre/ERT2)Hze/J	http://connectivity.brain-map.org/transgenic/search?search_type=line-name&search_term=Penk-2A-CreERT2	Weak widespread expression throughout the brain. Strong expression in striatum, olfactory tubercle, and very sparsely in dentate gyrus and cortex.
Plxnd1-Cre_OG1	Nathaniel Heintz and Charles Gerfen	Transgenic	BAC	MMRRC	036631	STOCK Tg(Plxnd1-cre)OG1Gsat/Mmucd	http://connectivity.brain-map.org/transgenic/search?search_type=line-name&search_term=Plxnd1-Cre_OG1	Widespread, scattered expression throughout the brain. Enriched in the cortex and in restricted populations within the striatum, olfactory areas, and hippocampal formation.
Pmch-Cre	Brad Lowell	Transgenic	BAC	The Jackson Laboratory	014099	STOCK Tg(Pmch-cre)1Lowl/J	http://connectivity.brain-map.org/transgenic/search?search_type=line-name&search_term=Pmch-Cre	Enriched in restricted populations within the hypothalamus.
Pnmt-Cre	Steven Ebert	Knock-in	Direct				http://connectivity.brain-map.org/transgenic/search?search_type=line-name&search_term=Pnmt-Cre	In restricted populations within the medulla, and enriched in layers 2/3, 5a and 6 of cortex as well as hippocampus.
Pomc-Cre (BL)	Brad Lowell	Transgenic	Conventional	The Jackson Laboratory	005965	STOCK Tg(Pomc1-cre)16Lowl/J	http://connectivity.brain-map.org/transgenic/search?search_type=line-name&search_term=Pomc-Cre (BL)	Enriched in arcuate nuclei and sparsely in the dentate gyrus of the hippocampus.
Pomc-Cre (ST)	Susumu Tonegawa	Transgenic	BAC	The Jackson Laboratory	010714	B6.FVB-Tg(Pomc-cre)1Stl/J	http://connectivity.brain-map.org/transgenic/search?search_type=line-name&search_term=Pomc-Cre (ST)	Enriched in arcuate nuclei and dentate gyrus of the hippocampus. Also scattered in medulla and midbrain.
Ppp1r17-Cre_NL146	Nathaniel Heintz and Charles Gerfen	Transgenic	BAC	MMRRC	036205	STOCK Tg(Ppp1r17-cre)NL146Gsat/Mmucd	http://connectivity.brain-map.org/transgenic/search?search_type=line-name&search_term=Ppp1r17-Cre_NL146	Cre expression is enriched in restricted populations in the hippocampus, cortical subplate, pallidum, thalamus, hypothalamus, midbrain, medulla, and cerebellum.
Prkcd-GluCla-CFP-IRES-Cre	David Anderson	Transgenic	BAC				http://connectivity.brain-map.org/transgenic/search?search_type=line-name&search_term=Prkcd-GluCla-CFP-IRES-Cre	Scattered expression throughout the brain. Enriched in layer 6a of cortex and restricted populations in thalamus, septal complexes, pons, and cerebellum.
Pvalb-2A-Cre	Allen Institute for Brain Science	Knock-in	T2A*	The Jackson Laboratory	012358	B6.Cg-Pvalbtm1.1(cre)Aibs/J	http://connectivity.brain-map.org/transgenic/search?search_type=line-name&search_term=Pvalb-2A-Cre	Expressed in scattered populations within the cerebellum, medulla, pons, midbrain, cortex, hippocampus, thalamus, and striatum.
Pvalb-2A-CreERT2	Allen Institute for Brain Science	Knock-in	T2A	The Jackson Laboratory	021189	B6.Cg-Pvalbtm1.1(cre/ERT2)Hze/J	http://connectivity.brain-map.org/transgenic/search?search_type=line-name&search_term=Pvalb-2A-CreERT2	Scattered expression throughout the cortex. Enriched in restricted populations in the cerebellum, medulla, pons, pallidum, and thalamus.
Pvalb-2A-dCre	Allen Institute for Brain Science	Knock-in	T2A	The Jackson Laboratory	022863	B6.Cg-Pvalbtm5.1(cre/folA)Hze/J	http://connectivity.brain-map.org/transgenic/search?search_type=line-name&search_term=Pvalb-2A-dCre	Scattered expression throughout the cortex. Enriched in restricted populations in the cerebellum, medulla, pons, pallidum, and thalamus.
Pvalb-CreERT2	Z. Josh Huang	Knock-in	Direct	The Jackson Laboratory	010777	B6(Cg)-Pvalbtm1(cre/ERT2)Zjh/J	http://connectivity.brain-map.org/transgenic/search?search_type=line-name&search_term=Pvalb-CreERT2	Very sparse, scattered expression. Enriched in restricted populations within the cerebellum.
Pvalb-IRES-Cre	Silvia Arber	Knock-in	IRES	The Jackson Laboratory	008069	B6;129P2-Pvalbtm1(cre)Arbr/J	http://connectivity.brain-map.org/transgenic/search?search_type=line-name&search_term=Pvalb-IRES-Cre	Expressed in restricted and/or sparse populations within the cerebellum, medulla, pons, midbrain, cortex, hippocampus, thalamus, and striatum.
Rasgrf2-2A-dCre	Allen Institute for Brain Science	Knock-in	T2A	The Jackson Laboratory	022864	B6;129S-Rasgrf2tm1.1(cre/folA)Hze/J	http://connectivity.brain-map.org/transgenic/search?search_type=line-name&search_term=Rasgrf2-2A-dCre	Scattered expression throughout the cortex with enriched expression in layers 2/3. Scattered expression in striatum, amygdala and hypothalamus. Enriched expression in the ventromedial hypothalamic nucleus and the paraventricular nucleus of the thalamus.
Rbp4-Cre_KL100	Nathaniel Heintz and Charles Gerfen	Transgenic	BAC	MMRRC	031125	STOCK Tg(Rbp4-cre)KL100Gsat/Mmucd	http://connectivity.brain-map.org/transgenic/search?search_type=line-name&search_term=Rbp4-Cre_KL100	Enriched in cortical layer 5 and the dentate gyrus.
Rorb-IRES2-Cre	Allen Institute for Brain Science	Knock-in	IRES2	The Jackson Laboratory	023526	B6;129S-Rorbtm1.1(cre)Hze/J	http://connectivity.brain-map.org/transgenic/search?search_type=line-name&search_term=Rorb-IRES2-Cre	Strong expression in the zonal layer of the superior colliculus and subregions of thalamus. Dense, patchy expression in layer 4 and sparse experssion in layer 5 and 6 in cortex. Also expressed in trigeminal nucleus and small patches of cells in cerebellum.
Satb2-Cre_MO23	Nathaniel Heintz and Charles Gerfen	Transgenic	BAC	MMRRC	032908	STOCK Tg(Satb2-cre)MO23Gsat/Mmucd	http://connectivity.brain-map.org/transgenic/search?search_type=line-name&search_term=Satb2-Cre_MO23	Highly enriched in cortex. Sparse expression in many other structures, including midbrain, hindbrain and olfactory bulb.
Scnn1a-Tg1-Cre	Allen Institute for Brain Science	Transgenic	BAC	The Jackson Laboratory	009111	B6;C3-Tg(Scnn1a-cre)1Aibs/J	http://connectivity.brain-map.org/transgenic/search?search_type=line-name&search_term=Scnn1a-Tg1-Cre	Scattered expression throughout cortex, striatum, hippocampus and cerebellum. In the cortex, reporter expression is enriched in layer 4.
Scnn1a-Tg2-Cre	Allen Institute for Brain Science	Transgenic	BAC	The Jackson Laboratory	009112	B6;C3-Tg(Scnn1a-cre)2Aibs/J	http://connectivity.brain-map.org/transgenic/search?search_type=line-name&search_term=Scnn1a-Tg2-Cre	Reporter expression in sparse and/or restricted regions of cortex (layer 4), thalamus, midbrain, medulla, pons, and cerebellum.
Scnn1a-Tg3-Cre	Allen Institute for Brain Science	Transgenic	BAC	The Jackson Laboratory	009613	B6;C3-Tg(Scnn1a-cre)3Aibs/J	http://connectivity.brain-map.org/transgenic/search?search_type=line-name&search_term=Scnn1a-Tg3-Cre	Enriched in cortical layer 4 and in restricted populations within cortex, thalamus, and in cerebellum.
Sim1-Cre	Brad Lowell	Transgenic	BAC	The Jackson Laboratory	006451	B6.FVB(129X1)-Tg(Sim1-cre)1Lowl/J	http://connectivity.brain-map.org/transgenic/search?search_type=line-name&search_term=Sim1-Cre	Enriched in restricted populations within the cerebellum, midbrain, hypothalamus, hippocampus (CA1), cortical subplate (amygdala), thalamus, and area-dependent enrichment in layers 2/3, 4, and 6b of cortex.
Sim1-Cre_KJ18	Nathaniel Heintz and Charles Gerfen	Transgenic	BAC	MMRRC	031742	STOCK Tg(Sim1-cre)KJ18Gsat/Mmucd	http://connectivity.brain-map.org/transgenic/search?search_type=line-name&search_term=Sim1-Cre_KJ18	Enriched in restricted populations within layer 5 of cortex, striatum (amygdala), and hypothalamus. Sparse, scattered expression elsewhere in the brain.
Six3-Cre	Guillermo Oliver	Transgenic	Conventional				http://connectivity.brain-map.org/transgenic/search?search_type=line-name&search_term=Six3-Cre	Enriched in cortical layer 4 and the striatum. In scattered cells in the cortex and throughout the brain.
Slc6a3-Cre	Xiaoxi Zhuang	Knock-in	Direct				http://connectivity.brain-map.org/transgenic/search?search_type=line-name&search_term=Slc6a3-Cre	Relatively specific to dopaminergic neurons in midbrain, hypothalamus and olfactory bulb. Scattered populations of reporter positive cells in basal forebrain, corticoamygdala area and brainstem.
Slc6a4-Cre_ET33	Nathaniel Heintz and Charles Gerfen	Transgenic	BAC	MMRRC	031028	B6.Cg-Tg(Slc6a4-cre)ET33Gsat/Mmcd	http://connectivity.brain-map.org/transgenic/search?search_type=line-name&search_term=Slc6a4-Cre_ET33	Both Cre and reporter expression are observed in restricted populations (serotonergic neurons) within the medulla, pons, and midbrain. Additional reporter expression was noted in thalamus.
Slc6a4-CreERT2_EZ13	Nathaniel Heintz and Charles Gerfen	Transgenic	BAC	MMRRC	030071	STOCK Tg(Slc6a4-cre/ERT2)EZ13Gsat/Mmcd	http://connectivity.brain-map.org/transgenic/search?search_type=line-name&search_term=Slc6a4-CreERT2_EZ13	Both Cre and reporter expression are observed in restricted populations (serotonergic neurons) within the medulla, pons, and midbrain. Additional reporter expression was noted in sparse cells of the hypothalamus.
Slc6a5-Cre_KF109	Nathaniel Heintz and Charles Gerfen	Transgenic	BAC	MMRRC	030730	STOCK Tg(Slc6a5-cre)KF109Gsat/Mmucd	http://connectivity.brain-map.org/transgenic/search?search_type=line-name&search_term=Slc6a5-Cre_KF109	Enriched in populations within the medulla and pons, and in a very restricted area of thalamus.
Slc17a6-IRES-Cre	Brad Lowell	Knock-in	IRES				http://connectivity.brain-map.org/transgenic/search?search_type=line-name&search_term=Slc17a6-IRES-Cre	Widespread expression throughout most of the brain, except very sparse expression in the striatum and restricted populations within cerebellum, medulla, and pons.
Slc17a8-iCre	Robert Edwards	Transgenic	BAC				http://connectivity.brain-map.org/transgenic/search?search_type=line-name&search_term=Slc17a8-iCre	Very sparse expression throughout the brain.
Slc17a7-IRES2-Cre	Allen Institute for Brain Science	Knock-in	IRES2	The Jackson Laboratory	023527	B6;129S-Slc17a7tm1.1(cre)Hze/J	http://connectivity.brain-map.org/transgenic/search?search_type=line-name&search_term=Slc17a7-IRES2-Cre	Strong expression throughout the cortex, olfactory bulb and anterior olfactory nuclei. Scattered expression in striatum, hippocampus, Enriched in restricted populations in pons, superior colliculus and anterodorsal nucleus of thalamus.
Slc18a2-Cre_OZ14	Nathaniel Heintz and Charles Gerfen	Transgenic	BAC	MMRRC	034814	STOCK Tg(Slc18a2-cre)OZ14Gsat/Mmcd	http://connectivity.brain-map.org/transgenic/search?search_type=line-name&search_term=Slc18a2-Cre_OZ14	Enriched in primary somatosensory area, layer 4 in cortex. Expression in restricted populations in striatum, thalamus, midbrain, pons, and cerebellum.
Slc32a1-IRES-Cre	Brad Lowell	Knock-in	IRES				http://connectivity.brain-map.org/transgenic/search?search_type=line-name&search_term=Slc32a1-IRES-Cre	Specific to GABAergic neurons. Enriched in the striatum and in restricted populations within the thalamus, hypothalamus, cerebellum, olfactory areas, and GABAergic interneurons of the cortex.
Snap25-IRES2-Cre	Allen Institute for Brain Science	Knock-in	IRES2	The Jackson Laboratory	023525	B6;129S-Snap25tm2.1(cre)Hze/J	http://connectivity.brain-map.org/transgenic/search?search_type=line-name&search_term=Snap25-IRES2-Cre	Strong widespread expression throughout the brain.
Sst-Cre	Allen Institute for Brain Science	Knock-in	Direct				http://connectivity.brain-map.org/transgenic/search?search_type=line-name&search_term=Sst-Cre	Sparse, scattered cells throughout most of the brain.
Sst-CreERT2	Z. Josh Huang	Knock-in	Direct	The Jackson Laboratory	010708	B6(Cg)-Ssttm1(cre/ERT2)Zjh/J	http://connectivity.brain-map.org/transgenic/search?search_type=line-name&search_term=Sst-CreERT2	Very sparse, scattered expression.
Sst-IRES-Cre	Z. Josh Huang	Knock-in	IRES	The Jackson Laboratory	013044	STOCK Ssttm2.1(cre)Zjh/J	http://connectivity.brain-map.org/transgenic/search?search_type=line-name&search_term=Sst-IRES-Cre	Strong scattered expression throughout the brain. Localized areas of enrichment include restricted populations in thalamus, amygdala, midbrain, hindbrain, cortical subplate, and Purkinje cell layer.
Syn1-Cre	Jamey Marth	Transgenic	Conventional	The Jackson Laboratory	003966	B6.Cg-Tg(Syn1-cre)671Jxm/J	http://connectivity.brain-map.org/transgenic/search?search_type=line-name&search_term=Syn1-Cre	Widespread expression throughout the brain. Relatively sparser expression in the striatum/pallidum. Enriched in cortex, particularly layer 4.
Syn1-icre/mRFP1	Ronald L. Davis and Paul A. Overbeek	Transgenic	Conventional	The Jackson Laboratory	012687	B6(129S4)-Tg(SYN1-icre/mRFP1)9934Rdav/J	http://connectivity.brain-map.org/transgenic/search?search_type=line-name&search_term=Syn1-icre/mRFP1	Expressed in restricted populations throughout the brain, including cortex, hippocampus, midbrain, hindbrain, cerebellum and olfactory bulb. Widespread expression in striatum.
Syt6-Cre_KI148	Nathaniel Heintz and Charles Gerfen	Transgenic	BAC	MMRRC	032012	STOCK Tg(Syt6-cre)KI148Gsat/Mmucd	http://connectivity.brain-map.org/transgenic/search?search_type=line-name&search_term=Syt6-Cre_KI148	Sparse, scattered expression in brain areas including the medulla, pons, and midbrain. Enriched in specific areas within thalamus, layer 6a cortex, and olfactory areas.
Syt17-Cre_NO14	Nathaniel Heintz and Charles Gerfen	Transgenic	BAC	MMRRC	034355	STOCK Tg(Syt17-cre)NO14Gsat/Mmucd	http://connectivity.brain-map.org/transgenic/search?search_type=line-name&search_term=Syt17-Cre_NO14	Enriched in layer 1 of frontal cortex; and in restricted populations in olfactory areas, hippocampal formation, piriform area, thalamus, midbrain, and medulla.
Tac1-IRES2-Cre	Allen Institute for Brain Science	Knock-in	IRES2	The Jackson Laboratory	021877	B6;129S-Tac1tm1.1(cre)Hze/J	http://connectivity.brain-map.org/transgenic/search?search_type=line-name&search_term=Tac1-IRES2-Cre	Scattered expression in caudate, septum, hypothalamus, midbrain, hindbrain and cerebellum. Dense expression in accessory olfactory bulb and anterior olfactory nucleus, thalamus, VMH and midbrain structures such as superior colliculus. Cre expression pattern is similar but more sparse.
Tac2-IRES2-Cre	Allen Institute for Brain Science	Knock-in	IRES2	The Jackson Laboratory	021878	B6;129S-Tac2tm1.1(cre)Hze/J	http://connectivity.brain-map.org/transgenic/search?search_type=line-name&search_term=Tac2-IRES2-Cre	Cre expression is enriched in habenula and restricted populations of the hypothalamus. Sparse expression in cortex, hippocampus and cerebellum.
Th-IRES-CreER	Jeremy Nathans	Knock-in	IRES	The Jackson Laboratory	008532	B6;129-Thtm1(cre/Esr1)Nat/J	http://connectivity.brain-map.org/transgenic/search?search_type=line-name&search_term=Th-IRES-CreER	Expressed in restricted and/or very sparse populations within the medulla, pons and midbrain, and hypothalamus.
Th-Cre_FI172	Nathaniel Heintz and Charles Gerfen	Transgenic	BAC	MMRRC	031029	B6.FVB(Cg)-Tg(Th-cre)FI172Gsat/Mmucd	http://connectivity.brain-map.org/transgenic/search?search_type=line-name&search_term=Th-Cre_FI172	Enriched in restricted populations in olfactory areas, cortical amygdalar area, hypothalamus, thalamus, midbrain, pons, medulla, and cerebellum. Sparse, scattered expression in cerebral nuclei.
Tlx3-Cre	Nathaniel Heintz and Charles Gerfen	Transgenic	BAC	MMRRC	036547	STOCK Tg(Tlx3-cre)PL56Gsat/Mmucd	http://connectivity.brain-map.org/transgenic/search?search_type=line-name&search_term=Tlx3-Cre	Widespread expression throughout the brain.
Trib2-2A-CreERT2	Allen Institute for Brain Science	Knock-in	F2A	The Jackson Laboratory	022865	B6.Cg-Trib2tm1.1(cre/ERT2)Hze/J	http://connectivity.brain-map.org/transgenic/search?search_type=line-name&search_term=Trib2-2A-CreERT2	Enriched in superficial layer 5 neurons of cortex. In scattered cells in the cortex and throughout the brain. Also widespread in vasculature.
Ucn3-Cre_KF43	Nathaniel Heintz and Charles Gerfen	Transgenic	BAC	MMRRC	032078	STOCK Tg(Ucn3-cre)KF43Gsat/Mmucd	http://connectivity.brain-map.org/transgenic/search?search_type=line-name&search_term=Ucn3-Cre_KF43	Enriched in restricted and/or sparse populations within the cerebellum, medulla, pons, midbrain, hypothalamus, thalamus, cortical subplate (amygdala), and striatum.
Vamp2-IRES-CreER	Jeremy Nathans	Knock-in	IRES	The Jackson Laboratory	008531	B6;129-Vamp2tm1(cre/Esr1)Nat/J	http://connectivity.brain-map.org/transgenic/search?search_type=line-name&search_term=Vamp2-IRES-CreER	Scattered, widespread expression throughout the brain.
Vip-IRES-Cre	Z. Josh Huang	Knock-in	IRES	The Jackson Laboratory	010908	STOCK Viptm1(cre)Zjh/J	http://connectivity.brain-map.org/transgenic/search?search_type=line-name&search_term=Vip-IRES-Cre	Strong scattered cells throughout the brain. Enriched expression in superficial cortical layers and restricted populations in hindbrain and midbrain.
Vipr2-Cre_KE2	Nathaniel Heintz and Charles Gerfen	Transgenic	BAC	MMRRC	034281	STOCK Tg(Vipr2-cre)KE2Gsat/Mmucd	http://connectivity.brain-map.org/transgenic/search?search_type=line-name&search_term=Vipr2-Cre_KE2	Widespread reporter expression. Cre expression is restricted to sparse populations in thalamus.
Wfs1-Tg2-CreERT2	Allen Institute for Brain Science	Transgenic	BAC	The Jackson Laboratory	009614	B6.Cg-Tg(Wfs1-cre/ERT2)2Aibs/J	http://connectivity.brain-map.org/transgenic/search?search_type=line-name&search_term=Wfs1-Tg2-CreERT2	Enriched in superficial layer neurons of the cortex and restricted populations within piriform cortex, hippocampal formation, cerebellum, pallidum, and olfactory areas.
Wfs1-Tg3-CreERT2	Allen Institute for Brain Science	Transgenic	BAC	The Jackson Laboratory	009103	B6;C3-Tg(Wfs1-cre/ERT2)3Aibs/J	http://connectivity.brain-map.org/transgenic/search?search_type=line-name&search_term=Wfs1-Tg3-CreERT2	Enriched in the piriform cortex and layer 2/3 of cortex; and in restricted populations within the hippocampus, striatum, thalamus, cerebellum, and olfactory areas. Without tamoxifen induction, reporter expression is restricted to entorhinal cortex.
Wnt3a-IRES-Cre	Ulrich Mueller	Knock-in	IRES	MMRRC	031748	B6(Cg)-Wnt3atm1.1(cre)Mull/Mmmh	http://connectivity.brain-map.org/transgenic/search?search_type=line-name&search_term=Wnt3a-IRES-Cre	Enriched in the thalamus and midbrain; and in restricted populations within the hippocampus, pons, and cerebellum.
			*T2A sequence for this line was 5'-gagggcagaggaagtcttctaacatgcggtgacgtggaggagaatcccggccct-3'
