# Supplementary material for: Anatomical characterization of Cre driver mice for neural circuit mapping and manipulation
Source: Front Neural Circuits. 2014 Jul 10;8:76. doi: 10.3389/fncir.2014.00076 (PMC4091307; doi:10.3389/fncir.2014.00076)
Supplement: Supplementary file 2 [file DataSheet2.XLSX]

## Sheet: Suppl. Table 2
* indicates that expression pattern may not qualitatively match endogenous		Image id	100095135			81578100			100095108			175707330			157077827			81658003	81658003	81658003	81658011			81578102			114374081			127171870	127171870	127171870	112609477	112609477	112609477	81034299			100134129	100134129	100134129	293794945			286680569			148055030
		Cre Line	A930038C07Rik-Tg1-Cre			A930038C07Rik-Tg4-Cre			Agrp-IRES-Cre			Calb2-CreERT2			Calb2-IRES-Cre			Camk2a-Cre	Camk2a-Cre	Camk2a-Cre	Camk2a-CreERT2			Cart-Tg1-Cre			Cck-CreERT2			Cck-IRES-Cre	Cck-IRES-Cre	Cck-IRES-Cre	Cdhr1-Cre_KG66	Cdhr1-Cre_KG66	Cdhr1-Cre_KG66	Chat-IRES-Cre			Chat-IRES-CreER	Chat-IRES-CreER	Chat-IRES-CreER	Chrna2-Cre_OE25			Chrnb4-Cre_OL57			Cnnm2-Cre_KD18
		Orientation	sagittal			sagittal			coronal			sagittal			coronal			sagittal	sagittal	sagittal	sagittal			sagittal			sagittal			coronal	coronal	coronal	sagittal	sagittal	sagittal	coronal			coronal	coronal	coronal	coronal			coronal			coronal
Major Division	Ontology order	Structure	Expression Energy	Expression Pattern	Matches Endogenous	Expression Energy	Expression Pattern	Matches Endogenous	Expression Energy	Expression Pattern	Matches Endogenous	Expression Energy	Expression Pattern	Matches Endogenous	Expression Energy	Expression Pattern	Matches Endogenous	Expression Energy	Expression Pattern	Matches Endogenous	Expression Energy	Expression Pattern	Matches Endogenous	Expression Energy	Expression Pattern	Matches Endogenous	Expression Energy	Expression Pattern	Matches Endogenous	Expression Energy	Expression Pattern	Matches Endogenous	Expression Energy	Expression Pattern	Matches Endogenous	Expression Energy	Expression Pattern	Matches Endogenous	Expression Energy	Expression Pattern	Matches Endogenous	Expression Energy	Expression Pattern	Matches Endogenous	Expression Energy	Expression Pattern	Matches Endogenous	Expression Energy	Expression Pattern
Isocortex	0.5	AVERAGE	21.4607	widespread	yes*	5.16023	laminar, sparse	yes*	2.93082	not expressed	yes	3.01033	sparse		8.99645	enriched	yes*	28.8501	widespread	yes	24.3344	widespread	yes	18.4454	widespread	yes*	8.20418	enriched	yes*	30.6278	widespread	yes	1.01012	sparse	no*	2.22277	not expressed	yes	0.386331	not expressed	yes	9.19852	laminar		15.7518	widespread		24.8136	widespread
Isocortex	1	FRP	14.2322	widespread	yes*	5.15204	not expressed	yes*		not expressed	yes	5.16021	sparse		4.5262	sparse	yes	13.4255	widespread	yes	11.8068	widespread	yes	11.1711	widespread	yes*	1.69248	enriched	yes*	15.9739	widespread	yes	1.45388	not expressed	yes		not expressed	yes	0.333598	not expressed	yes		laminar			widespread		9.75778	widespread
Isocortex	2	MOp	15.6774	widespread	yes*	4.09717	laminar, sparse	yes*	2.21427	not expressed	yes	1.21406	sparse		7.5769	sparse	yes	21.5621	widespread	yes	17.724	widespread	yes	18.912	widespread	yes*	7.81084	enriched	yes*	23.9015	widespread	yes	1.83888	sparse	no*	1.38678	not expressed	yes	0.271362	not expressed	yes	6.75426	laminar		16.9985	widespread		27.7111	widespread
Isocortex	3	Mos (sagittal - na)	13.5171	na	na	4.28448	na	na	2.86536	not expressed	yes	1.35996	na		7.09275	sparse	yes	19.7061	na	na	17.2388	na	na	15.7962	na	na	7.92982	na	na	20.0881	widespread	yes	1.4639	na	na	1.94009	not expressed	yes	0.312083	not expressed	yes	8.18956	laminar		18.4384	widespread		26.6451	widespread
Isocortex	4	SSp-n (sagittal - na)	23.8853	na	na	5.48379	na	na	2.22909	not expressed	yes	1.87575	na		5.1962	sparse	yes	35.615	na	na	29.294	na	na	33.7484	na	na	9.87897	na	na	32.4283	widespread	yes	0.117633	na	na	1.53817	not expressed	yes	0.189048	not expressed	yes	6.73127	laminar		14.0747	widespread		33.0149	widespread
Isocortex	5	SSp-bfd	17.4894	widespread	yes*	5.40283	laminar, sparse	yes*	2.40197	not expressed	yes	1.96532	sparse		8.92344	enriched	no	31.1224	widespread	yes	26.5407	widespread	yes	19.3121	widespread	yes*	9.15998	enriched	yes*	37.6184	widespread	yes	0.1457	sparse	no*	1.30484	not expressed	yes	0.239059	not expressed	yes	6.82951	laminar		21.3108	widespread		32.9562	widespread
Isocortex	6	SSp-ll (sagittal - na)	14.568	na	na	4.95229	na	na	2.84718	not expressed	yes	1.49702	na		12.0767	enriched	no	25.3725	na	na	20.6118	na	na	16.9415	na	na	8.93256	na	na	39.1851	widespread	yes	1.5119	na	na	2.05769	not expressed	yes	0.351563	not expressed	yes	8.92319	laminar		23.2237	widespread		31.888	widespread
Isocortex	7	SSp-m (sagittal - na)	19.8777	na	na	4.07315	na	na	1.91363	not expressed	yes	1.29308	na		5.00198	sparse	yes	27.0618	na	na	24.0309	na	na	25.333	na	na	9.63594	na	na	26.11	widespread	yes	0.148041	na	na	1.50359	not expressed	yes	0.226925	not expressed	yes	6.52316	laminar		12.314	widespread		30.5487	widespread
Isocortex	8	SSp-ul (sagittal - na)	14.9746	na	na	4.00489	na	na	2.19455	not expressed	yes	1.23255	na		9.48259	enriched	no	23.3752	na	na	22.1242	na	na	17.6695	na	na	9.13902	na	na	34.4535	widespread	yes	0.263144	na	na	1.66005	not expressed	yes	0.297015	not expressed	yes	7.54202	laminar		18.355	widespread		31.6952	widespread
Isocortex	9	SSp-tr (sagittal - na)	14.5194	na	na	4.45335	na	na	2.89588	not expressed	yes	1.68955	na		11.3697	enriched	no	23.9969	na	na	22.7418	na	na	13.6603	na	na	9.79034	na	na	38.9612	widespread	yes	0.824404	na	na	1.37893	not expressed	yes	0.305224	not expressed	yes	10.1031	laminar		24.4714	widespread		29.2841	widespread
Isocortex	10	SSp-un (sagittal - na)		na	na		na	na		not expressed	yes		na		6.07036	sparse	yes		na	na		na	na		na	na		na	na		widespread	yes		na	na		not expressed	yes		not expressed	yes	5.50795	laminar		13.419	widespread		25.9624	widespread
Isocortex	11	SSs (sagittal - na)	20.1976	na	na	5.5626	na	na	2.91458	not expressed	yes	3.02404	na		7.37774	sparse	yes	35.1958	na	na	26.854	na	na	29.1911	na	na	9.69698	na	na	34.3817	widespread	yes	0.232704	na	na	1.39109	not expressed	yes	0.188222	not expressed	yes	6.87688	laminar		18.6556	widespread		30.4182	widespread
Isocortex	12	GU	26.6831	widespread	yes*	4.94416	laminar, sparse	yes*	2.53284	not expressed	yes	1.98951	sparse		6.97136	sparse	yes	32.1921	widespread	yes	27.4244	widespread	yes	33.7794	widespread	yes*	12.2826	enriched	yes*	32.0044	widespread	yes	0.199188	not expressed	yes	1.65296	not expressed	yes	0.158935	not expressed	yes	5.68066	laminar		9.21868	widespread		30.8917	widespread
Isocortex	13	VISC	25.427	widespread	yes*	5.59852	laminar, sparse	yes*	3.23109	not expressed	yes	2.38232	sparse		10.7085	sparse	yes	35.6987	widespread	yes	30.0012	widespread	yes	28.268	widespread	yes*		enriched	yes*	33.5649	widespread	yes	0.327434	sparse	no*	1.44446	not expressed	yes	0.130122	not expressed	yes	8.246	laminar		15.7489	widespread		32.7667	widespread
Isocortex	14	AUDd (sagittal - na)	25.4664	na	na	4.55292	na	na	2.72078	not expressed	yes	4.50807	na		7.28113	sparse	yes	33.1502	na	na	27.9645	na	na	18.3444	na	na		na	na	38.0889	widespread	yes	0.196889	na	na	2.09625	not expressed	yes	0.361993	not expressed	yes	8.64743	laminar		21.5379	widespread		29.207	widespread
Isocortex	15	AUDp (sagittal - na)	27.976	na	na	3.89162	na	na	3.15652	not expressed	yes	6.15758	na		7.7353	sparse	yes		na	na	25.4824	na	na	14.2345	na	na		na	na	35.7106	widespread	yes		na	na	2.41534	not expressed	yes	0.34108	not expressed	yes	10.6725	laminar		21.8542	widespread		31.0347	widespread
Isocortex	16	AUDpo (sagittal - na)		na	na	3.71163	na	na	3.377	not expressed	yes		na		6.80261	sparse	yes		na	na	25.5008	na	na	14.7955	na	na		na	na	33.148	widespread	yes		na	na	2.74508	not expressed	yes	0.58371	not expressed	yes	11.6037	laminar		13.1897	widespread		20.0797	widespread
Isocortex	17	AUDv (sagittal - na)	23.5094	na	na	5.0387	na	na	3.28641	not expressed	yes	5.66508	na		10.6387	enriched	no		na	na	26.6131	na	na	17.8266	na	na		na	na	33.9289	widespread	yes		na	na	2.32313	not expressed	yes	0.274795	not expressed	yes	9.90581	laminar		23.5989	widespread		29.0551	widespread
Isocortex	18	VISal (sagittal - na)	23.6316	na	na	6.69809	na	na	2.74802	not expressed	yes	3.06212	na		7.58537	enriched	yes	37.9119	na	na	27.5857	na	na	15.29	na	na	5.07825	na	na	37.2765	widespread	yes	0.318968	na	na	2.31981	not expressed	yes	0.362324	not expressed	yes	8.09808	laminar		17.7754	widespread		26.5371	widespread
Isocortex	19	VISam (sagittal - na)	18.4228	na	na	5.0142	na	na	2.34616	not expressed	yes	2.58171	na		9.16681	enriched	yes	26.6069	na	na	22.6814	na	na	17.7864	na	na	7.29854	na	na	41.1385	widespread	yes	1.86834	na	na	2.14684	not expressed	yes	0.3469	not expressed	yes	10.2445	laminar		14.1101	widespread		27.8167	widespread
Isocortex	20	VISl (sagittal - na)	24.9225	na	na	6.59516	na	na	2.61295	not expressed	yes	4.49299	na		8.64876	sparse	yes	39.2821	na	na	28.7714	na	na	15.7905	na	na	3.28538	na	na	32.6516	widespread	yes	0.330297	na	na	2.81995	not expressed	yes	0.417694	not expressed	yes	8.31654	laminar		2.46806	widespread		21.5942	widespread
Isocortex	21	VISp	20.145	widespread	yes*	5.69034	laminar, sparse	yes*	2.27569	not expressed	yes	2.96229	sparse		8.19413	enriched	yes	27.6059	widespread	yes	25.7493	widespread	yes	13.695	widespread	yes*	6.7412	enriched	yes*	32.1172	widespread	yes	0.33039	sparse	no*	2.27009	not expressed	yes	0.461292	not expressed	yes	7.82069	laminar		8.57882	widespread		21.165	widespread
Isocortex	22	VISpl (sagittal - na)	22.6764	na	na	6.33936	na	na	0.839577	not expressed	yes	3.60487	na		7.24671	sparse	yes	35.7318	na	na	29.563	na	na	11.8358	na	na	7.60344	na	na	28.2632	widespread	yes	0.315606	na	na	3.03678	not expressed	yes	0.367332	not expressed	yes	7.76617	laminar		8.32352	widespread		10.7383	widespread
Isocortex	23	VISpm (sagittal - na)	19.7857	na	na	4.52352	na	na	0.98611	not expressed	yes	4.65386	na		5.37837	enriched	no	21.4915	na	na	21.9363	na	na	11.9836	na	na	7.39064	na	na	22.8551	widespread	yes	0.790948	na	na	2.20792	not expressed	yes	0.33664	not expressed	yes	7.91374	laminar		10.568	widespread		7.93473	widespread
Isocortex	24	ACAd	17.2035	widespread	yes*	5.17984	laminar, sparse	yes*	3.81393	not expressed	yes	2.26501	sparse		9.72144	sparse	yes	25.4701	widespread	yes	25.1679	widespread	yes	20.035	widespread	yes*	10.6097	enriched	yes*	27.0495	widespread	yes	1.34702	not expressed	yes	2.51492	not expressed	yes	0.490173	not expressed	yes	9.52668	laminar		22.3155	widespread		26.7328	widespread
Isocortex	25	ACAv (sagittal - na)	18.7793	na	na	4.55615	na	na	3.10332	not expressed	yes	2.18691	na		18.1935	sparse	yes	24.4228	na	na	20.5809	na	na	20.9408	na	na	10.9385	na	na	37.1222	widespread	yes	1.56142	na	na	2.50426	not expressed	yes	0.415135	not expressed	yes	8.60132	laminar		26.3129	widespread		25.8743	widespread
Isocortex	26	PL	23.9842	widespread	yes*	4.8151	not expressed	yes*	4.92524	not expressed	yes	1.88451	sparse		10.7634	sparse	yes	25.3562	widespread	yes	24.3908	widespread	yes	16.678	widespread	yes*	12.2172	enriched	yes*	13.4253	widespread	yes	1.14634	not expressed	yes	4.45062	not expressed	yes	0.462668	not expressed	yes	11.3039	laminar		19.2493	widespread		22.8479	widespread
Isocortex	27	ILA	25.846	widespread	yes*	5.0485	not expressed	yes*	5.10062	not expressed	yes	2.21872	sparse		14.8847	enriched	yes	29.5065	widespread	yes	22.9224	widespread	yes	15.5337	widespread	yes*	6.99592	enriched	yes*	28.8429	widespread	yes	1.22708	not expressed	yes	3.5827	not expressed	yes	1.05998	not expressed	yes	14.6595	laminar		22.0116	widespread		25.5358	widespread
Isocortex	28	ORBl (sagittal - na)	28.921	na	na	6.6004	na	na	4.51798	not expressed	yes	1.93559	sparse		6.05683	sparse	yes	35.8718	na	na	24.987	na	na	23.6613	na	na	11.2344	na	na	16.6103	widespread	yes	1.81687	na	na	2.78295	not expressed	yes	0.748552	not expressed	yes	16.2493	laminar		7.03694	widespread		26.739	widespread
Isocortex	29	ORBm	23.7531	widespread	yes*	5.83611	laminar, sparse	yes*	6.87604	not expressed	yes	3.6977	sparse		9.77055	sparse	yes	22.6288	widespread	yes	24.168	widespread	yes	14.9319	widespread	yes*	9.81504	enriched	yes*	22.4779	widespread	yes	1.29312	not expressed	yes	4.52622	not expressed	yes	0.987975	not expressed	yes	17.3387	laminar			widespread		17.6865	widespread
Isocortex	30	ORBvl (sagittal - na)	25.6486	na	na	6.50289	na	na	6.42464	not expressed	yes	6.29437	sparse		10.2027	enriched	yes	28.7155	na	na	21.1475	na	na	17.2299	na	na	8.41581	na	na	30.6509	widespread	yes	2.44941	na	na	3.88783	not expressed	yes	1.2634	not expressed	yes	15.9108	laminar		15.3395	widespread		20.2873	widespread
Isocortex	31	AId	29.4372	widespread	yes*	5.54405	sparse	yes*	2.3174	not expressed	yes	1.7075	sparse		7.06384	enriched	yes	28.1975	widespread	yes	24.5715	widespread	yes	26.6103	widespread	yes*	9.3408	enriched	yes*	15.4498	widespread	yes	0.427944	not expressed	yes	1.01092	not expressed	yes	0.226597	not expressed	yes	4.03746	laminar		4.81917	widespread		24.342	widespread
Isocortex	32	AIp	28.2326	widespread	yes*	6.40552	sparse	yes*	3.27385	not expressed	yes	3.05281	sparse		15.8696	enriched	yes	40.6523	widespread	yes	29.0259	widespread	yes	23.9699	widespread	yes*	7.19825	enriched	yes*	36.344	widespread	yes	0.222748	not expressed	yes	1.40109	not expressed	yes	0.136992	not expressed	yes	7.9535	laminar		15.2594	widespread		24.2072	widespread
Isocortex	33	AIv	29.3483	widespread	yes*	5.6071	sparse	yes*	2.96359	not expressed	yes	2.08882	sparse		9.12789	enriched	yes	30.3719	widespread	yes	25.7501	widespread	yes	26.0623	widespread	yes*	6.56766	enriched	yes*	24.552	widespread	yes	0.21919	not expressed	yes	1.49173	not expressed	yes	0.187719	not expressed	yes	5.22631	laminar		2.27745	widespread		26.2963	widespread
Isocortex	34	RSPagl (sagittal - na)	14.7788	na	na	4.36839	na	na	1.74543	not expressed	yes	3.80213	na		6.88378	sparse	yes	25.1392	na	na	19.4217	na	na	14.1226	na	na	7.66833	na	na	37.568	widespread	yes	4.77371	na	na	1.90546	not expressed	yes	0.340294	not expressed	yes	9.77173	laminar		7.63211	widespread		21.2974	widespread
Isocortex	35	RSPd	15.6767	widespread	yes*	4.26567	not expressed	yes*	1.55134	not expressed	yes	2.77598	sparse		6.72274	sparse	yes	22.5544	widespread	yes	21.2118	widespread	yes	12.2851	scattered	yes*	7.87149	enriched	yes*	31.4127	widespread	yes	1.91326	sparse	no*	1.75059	not expressed	yes	0.319434	not expressed	yes	9.68225	laminar		14.7465	widespread		19.6619	widespread
Isocortex	36	RSPv	18.2313	widespread	yes*	4.7444	not expressed	yes*	2.88849	not expressed	yes	2.1838	sparse		11.4936	sparse	yes	27.1908	widespread	yes	20.9307	widespread	yes	15.9318	scattered	yes*	7.86876	enriched	yes*	35.9456	widespread	yes	1.82834	sparse	no*	1.58636	not expressed	yes	0.390675	not expressed	yes	8.80684	laminar		16.5249	widespread		17.1507	widespread
Isocortex	37	PTLp	17.2205	widespread	yes*	4.9486	laminar, sparse	yes*	2.12517	not expressed	yes	2.72121	sparse		9.04539	enriched	no	26.1794	widespread	yes	23.1044	widespread	yes	18.5877	widespread	yes*	9.43105	enriched	yes*	38.3311	widespread	yes	1.85461	sparse	no*	1.96528	not expressed	yes	0.345677	not expressed	yes	11.2811	laminar		23.6545	widespread		29.1212	widespread
Isocortex	38	TEa (sagittal - na)	23.9269	na	na	6.46341	na	na	2.57798	not expressed	yes	5.06433	na		11.6039	sparse	yes	40.323	na	na	28.2709	na	na	14.2284	na	na	5.84419	na	na	32.479	widespread	yes	0.340064	na	na	2.63015	not expressed	yes	0.312894	not expressed	yes	10.2586	laminar		16.0237	widespread		21.2982	widespread
Isocortex	39	PERI (sagittal - na)	24.3736	na	na	4.92497	na	na	2.73542	not expressed	yes		na		10.4255	enriched	no		na	na	29.0569	na	na	10.0195	na	na		na	na	35.3034	widespread	yes		na	na	2.45321	not expressed	yes	0.271005	not expressed	yes	10.301	laminar		22.3954	widespread		24.7936	widespread
Isocortex	40	ECT	22.5616	widespread	yes*	5.37315	laminar, sparse	yes*	1.84112	not expressed	yes	5.13073	sparse		10.9765	enriched	no	31.0681	widespread	yes	26.0926	widespread	yes	13.1781	widespread	yes*	5.37401	enriched	yes*	27.0703	widespread	yes	0.254826	not expressed	yes	2.38118	not expressed	yes	0.250821	not expressed	yes	8.93675	laminar		14.7377	widespread		19.9707	widespread
Olfactory Areas	40.5	AVERAGE	19.1895	widespread	yes*	4.34266	sparse	no	3.243	not expressed	yes	5.91008	enriched		21.4461	enriched		23.3768	widespread	yes	16.9442	widespread	yes	10.4492	enriched	yes*	2.24261	restricted, sparse	yes*	22.0053	widespread	yes	2.40808	restricted	yes	2.26773	not expressed	yes	0.510618	not expressed	yes	10.8017	enriched		18.1368	widespread		13.3326	enriched
Olfactory Areas	41	MOB	18.9409	widespread	yes*	3.51026	not expressed	no	3.80151	not expressed	yes	8.84674	scattered		29.1833	widespread		13.5589	widespread	yes	14.1532	widespread	yes	11.4699	scattered	yes*	2.60509	not expressed	no	19.1599	widespread	yes*	8.64128	restricted	yes	1.97926	not expressed	yes	0.637354	not expressed	yes	2.86611	scattered			widespread		6.66714	restricted, scattered
Olfactory Areas	42	AOB	24.3976	widespread	yes*	6.52115	not expressed	no	3.34589	not expressed	yes	19.3549	restricted		24.0452	widespread		36.9314	widespread	yes	19.4783	widespread	yes	14.3165	scattered	yes	5.44898	not expressed	no	10.5618	widespread	yes	9.91406	restricted	yes		not expressed	yes	0.562592	not expressed	yes		restricted			widespread		4.77936	restricted, scattered
Olfactory Areas	43	AON	22.2161	widespread	yes*	5.26254	sparse	no	3.36431	not expressed	yes	3.26782	not expressed		14.5491	widespread		21.5022	widespread	yes	17.8985	widespread	yes	10.9339	scattered	yes	3.38422	scattered	yes	16.5783	widespread	yes	3.11451	not expressed	yes	1.60491	not expressed	yes	0.581865	not expressed	yes	6.28271	restricted		7.85875	widespread		9.33172	restricted, scattered
Olfactory Areas	44	TT	23.6493	widespread	yes*	4.4496	not expressed	no	5.00376	not expressed	yes	2.72892	not expressed		26.1807	enriched		26.9999	widespread	yes	24.0651	widespread	yes	14.0366	scattered	no	2.86626	sparse	yes*	22.6533	widespread	yes	1.38437	not expressed	no	2.31237	not expressed	yes	1.05146	not expressed	yes	11.0551			16.7942	scattered		12.0525	enriched
Olfactory Areas	45	DP (sagittal - na)	26.2743	na	na	4.65727	na	na	4.71791	not expressed	yes	2.20128	na		17.3265	scattered		31.479	widespread	yes	25.1792	widespread	yes	13.818	na	na	1.99419	na	na	26.3243	widespread	yes	1.20018	na	na	4.08617	not expressed	yes	1.24336	not expressed	yes	13.1229			17.1422	widespread		18.5787	enriched
Olfactory Areas	46	PIR	26.6916	widespread	yes*	5.59267	restricted, sparse	yes	2.75361	not expressed	yes	2.72902	sparse		8.93925	scattered		27.9642	widespread	yes	23.6431	widespread	yes	13.9353	enriched	yes	2.32969	sparse	yes*	26.6593	widespread	yes	0.53797	not expressed	yes	1.36204	not expressed	yes	0.214257	not expressed	yes	8.63888			13.396	widespread		21.5069	widespread
Olfactory Areas	47	NLOT	14.6278	widespread	yes*	4.97836	sparse	yes	3.67762	not expressed	yes	7.46959	scattered		20.0487	scattered		24.3878	widespread	yes	17.8841	widespread	yes	8.69301	scattered	yes	1.6104	sparse	yes*	5.01196	widespread	yes	0.97213	sparse	no*	3.08472	not expressed	yes	0.524767	not expressed	yes	12.6048			14.1835	scattered		10.2619	scattered
Olfactory Areas	48	COAa	11.7178	widespread	yes*	3.66042	sparse	yes	2.21447	not expressed	yes	7.38173	enriched		28.0972	scattered		17.7202	widespread	yes	10.7089	widespread	yes	5.82565	scattered	yes	1.48037	restricted, sparse	yes*	13.0882	widespread	yes	0.355355	not expressed	yes	2.71361	not expressed	yes	0.268666	not expressed	yes	15.3283	enriched		19.2297	widespread		15.1448	scattered
Olfactory Areas	49	COAp	10.9158	widespread	yes*	3.52521	sparse	yes	2.35754	not expressed	yes	3.40278	sparse		27.4794	sparse		18.6942	widespread	yes	9.71143	widespread	yes	6.64668	scattered	yes*	0.855116	restricted, sparse	yes*	32.004	widespread	yes	0.0835675	not expressed	yes	2.0361	not expressed	yes	0.146327	not expressed	yes	12.0358	enriched		27.1069	widespread		11.3227	scattered
Olfactory Areas	50	PAA	12.4401	widespread	yes	2.05606	sparse	yes	2.27556	not expressed	yes	2.97886	sparse		17.5923	scattered		15.2116	widespread	yes	7.2254	widespread	yes	5.53033	scattered	yes*	0.472237	sparse	yes*	33.9089	widespread	yes	0.0706426	not expressed	yes	1.69566	not expressed	yes	0.102227	not expressed	yes	12.9911			26.1155	widespread		19.0268	scattered
Olfactory Areas	51	TR	19.213	widespread	yes*	3.55571	sparse	yes	2.16079	not expressed	yes	4.64928	sparse		22.465	scattered		22.6958	widespread	yes	16.439	widespread	yes	9.73515	scattered	yes*	1.62214	sparse	yes*	36.1086	widespread	yes	0.214771	not expressed	yes	1.80242	not expressed	yes	0.283926	not expressed	yes	13.0909			21.404	widespread		17.9858	scattered
Hippocampus	51.5	AVERAGE	18.2052	widespread	yes*	3.43234	sparse	yes*	2.44573	not expressed	yes	3.22976	restricted, sparse		17.2898	enriched		21.1945	enriched	yes	19.7505	enriched	yes	13.66	enriched	no	3.05312	enriched	yes*	30.6667	widespread	yes	1.19699	not expressed	yes	1.65871	not expressed	yes	0.328041	not expressed	yes	5.83193	scattered		16.9667	widespread		12.4602	enriched
Hippocampus	52	CA1	15.4397	widespread	yes*	2.80581	not expressed	no*	2.6208	not expressed	yes	2.35819	not expressed		11.3705	enriched		19.1758	enriched	yes	19.0934	enriched	yes	9.4191	restricted	yes*	1.24294	sparse	yes*	24.4432	widespread	yes	0.598148	not expressed	yes	1.06188	not expressed	yes	0.228634	not expressed	yes	3.42724	scattered		17.8061	restricted		7.08431	scattered
Hippocampus	53	CA2	15.1603	widespread	yes*	2.36886	not expressed	no*	1.9592	not expressed	yes	1.80177	not expressed		17.8316	enriched		17.405	enriched	yes	19.522	enriched	yes	7.49781	not expressed	yes	1.80275	sparse	yes*	21.9986	widespread	yes	0.890263	not expressed	yes	0.79131	not expressed	yes	0.159073	not expressed	yes	3.9148	scattered		12.8428	restricted		5.47198	scattered
Hippocampus	54	CA3	18.4937	widespread	yes*	2.49783	not expressed	no*	2.02383	not expressed	yes	2.13118	not expressed		29.5513	enriched		17.7822	enriched	yes	21.7851	enriched	yes	8.27192	not expressed	yes	0.854184	sparse	yes*	24.5455	widespread	yes	0.52361	not expressed	yes	1.01377	not expressed	yes	0.239008	not expressed	yes	5.32427	scattered		19.4432	restricted		11.7003	enriched
Hippocampus	55	DG	22.9143	widespread	yes*	2.74937	not expressed	no	2.3919	not expressed	yes	3.21064	restricted, sparse		24.52	enriched		21.1265	enriched	yes	22.0296	enriched	yes	13.3714	restricted	yes*	1.442	sparse	yes*	31.6322	widespread	yes	0.867431	sparse	no*	1.28866	not expressed	yes	0.243477	not expressed	yes	5.61806	scattered		20.3408	enriched		6.98196	scattered
Hippocampus	56	FC	14.9047	widespread	no		sparse	no*	3.7986	not expressed	yes	4.1109	not expressed		16.399	restricted		10.7424	widespread	yes	14.7716	widespread	yes	13.6774	sparse	yes	3.8973	sparse	yes*	30.0581	widespread	yes	6.39481	not expressed	yes	1.3942	not expressed	yes	0.69568	not expressed	yes	10.0223			16.0119	restricted		9.3645	scattered
Hippocampus	57	IG	19.8519	widespread	yes*	3.35785	not expressed	no	2.48752	not expressed	yes	2.13732	sparse		16.1276	restricted		17.738	widespread	yes	17.7375	widespread	yes	16.3356	widespread	no	3.82602	sparse	yes*	33.985	widespread	yes	0.792111	not expressed	yes	2.29738	not expressed	yes	0.458314	not expressed	yes	7.71266			22.5942	widespread		16.9566	widespread
Hippocampus	58	ENTl	21.864	widespread	yes*	3.39637	sparse	yes	1.61657	not expressed	yes	4.69834	restricted, sparse		9.82079	restricted, sparse		23.3899	widespread	yes	22.078	widespread	yes	14.7322	enriched	no	1.00942	sparse	yes*	31.2283	widespread	yes	0.151592	not expressed	yes	2.27416	not expressed	yes	0.29193	not expressed	yes	6.43891			14.7998	widespread		23.8657	enriched
Hippocampus	59	ENTm	18.7649	widespread	yes*	2.86546	sparse	yes	1.33086	not expressed	yes	4.73187	restricted, sparse		15.6736	enriched		20.8654	widespread	yes	13.8893	widespread	yes	15.4492	enriched	no	2.32831	sparse	yes*	33.7287	widespread	yes	1.36402	not expressed	yes	1.66125	not expressed	yes	0.189905	not expressed	yes	5.63576			11.7377	widespread		17.3004	enriched
Hippocampus	60	ENTmv	13.1116	widespread	yes*	3.59252	sparse	yes	1.57525	not expressed	yes	4.11115	restricted, sparse		22.8649	enriched		17.4288	widespread	yes	9.00055	widespread	yes	8.79681	sparse	no	1.78145	sparse	yes*	41.7324	widespread	yes	0.108189	not expressed	yes	2.12092	not expressed	yes	0.595057	not expressed	yes	7.22906			17.615	widespread		10.9709	enriched
Hippocampus	61	PAR	19.3919	widespread	yes*	3.6637	not expressed	no	1.35025	not expressed	yes	3.90055	sparse		20.5332	enriched		24.3416	widespread	yes	19.0765	widespread	yes	14.88	sparse	no	8.8692	enriched	yes*	32.6238	widespread	yes	1.78586	not expressed	yes	1.97944	not expressed	yes	0.212182	not expressed	yes	4.05709			11.3207	widespread		9.96839	scattered
Hippocampus	62	POST	20.7136	widespread	no	5.74729	sparse	no*	3.74145	not expressed	yes	3.46957	sparse		14.6343	enriched		25.9397	widespread	yes	25.9133	widespread	yes	19.2017	enriched	no	6.75224	enriched	yes*	33.1151	widespread	yes	1.5125	not expressed	yes	2.57069	not expressed	yes	0.379157	not expressed	yes	8.68643			14.3655	widespread		14.5154	scattered
Hippocampus	63	PRE	20.5037	widespread	no	4.12075	not expressed	yes	2.56973	not expressed	yes	2.55085	sparse		21.8976	enriched		28.4761	widespread	yes	23.9256	widespread	yes	15.9604	enriched	no	6.21913	enriched	yes*	33.5736	widespread	yes	0.56983	not expressed	yes	1.97434	not expressed	yes	0.349876	not expressed	yes	4.68992			13.9024	widespread		12.7932	scattered
Hippocampus	64	SUBd	16.5383	widespread	no	3.50214	sparse	no*	3.97496	not expressed	yes	2.20888	sparse		9.18432	sparse		24.6509	widespread	yes	21.6954	widespread	yes	17.1458	enriched	no	1.44724	sparse	yes*	27.9901	widespread	yes	1.00524	not expressed	yes	1.34037	not expressed	yes	0.262906	not expressed	yes	5.3975	scattered		25.002	widespread		17.5211	scattered
Hippocampus	65	SUBv (sagittal - na)	17.2201	na	na	3.95248	na	na	2.79931	not expressed	yes	3.79542	na		11.6481	sparse		27.6605	na	na	25.9896	na	na	16.5007	na	na	1.27151	na	na	28.6788	widespread	yes	0.194303	na	na	1.45356	not expressed	yes	0.287381	not expressed	yes	3.49305	scattered		19.751	widespread		9.94804	scattered
Cortical Subplate	65.5	AVERAGE	20.7803	widespread	yes*	4.66964	restricted, sparse	yes	2.79557	not expressed	yes	4.59036	enriched		18.9763	enriched		29.7675	widespread	yes	25.7462	widespread	yes	15.0139	scattered	no	3.32587	enriched	yes*	27.29	widespread	yes	0.392827	not expressed	yes	1.99506	not expressed	yes	0.223067	not expressed	yes	9.87845	enriched		22.1651	widespread		14.9777	enriched
Cortical Subplate	66	CLA	24.3701	widespread	yes*	4.72398	sparse	yes	2.77462	not expressed	yes	2.20803	sparse		3.76659	sparse		36.3689	widespread	yes	29.9623	widespread	yes	21.2707	widespread	no	9.17373	enriched	yes*	35.1741	widespread	yes	0.410695	not expressed	yes	2.16437	not expressed	yes	0.234117	not expressed	yes	8.68588			18.5325	widespread		24.9544	scattered
Cortical Subplate	67	EPd	23.6481	widespread	yes*	5.13346	sparse	yes	3.53447	not expressed	yes	2.44022	sparse		6.69685	sparse		35.7034	widespread	yes	25.9414	widespread	yes	13.3544	sparse	no	4.33997	restricted, sparse	yes*	32.0368	widespread	yes	0.659782	not expressed	yes	2.17754	not expressed	yes	0.347751	not expressed	yes	13.2149	scattered		16.5828	widespread		19.1036	scattered
Cortical Subplate	68	EPv	19.3318	widespread	yes*	4.10751	sparse	yes	2.95811	not expressed	yes	3.48377	sparse		17.046	scattered		26.9203	widespread	yes	23.3159	widespread	yes	14.1044	sparse	no	1.55461	sparse	yes*	23.321	widespread	yes	0.472247	not expressed	yes	1.79978	not expressed	yes	0.203082	not expressed	yes	11.0388	enriched		19.5002	widespread		13.7148	scattered
Cortical Subplate	69	LA	20.0902	widespread	yes*	4.41532	restricted, sparse	yes	2.23015	not expressed	yes	3.93767	sparse		14.768	sparse		30.7695	widespread	yes	23.053	widespread	yes	13.6046	scattered	no	1.71219	not expressed	no	25.7944	widespread	yes	0.23288	not expressed	yes	1.96369	not expressed	yes	0.197983	not expressed	yes	8.04836			23.186	widespread		10.1047	enriched
Cortical Subplate	70	BLA	19.215	widespread	yes*	4.29169	not expressed	no*	2.54375	not expressed	yes	4.55019	sparse		27.2707	enriched		28.4029	widespread	yes	24.7334	widespread	yes	15.4017	scattered	no	3.68725	restricted	yes*	27.0738	widespread	yes	0.317817	not expressed	yes	1.76493	not expressed	yes	0.173062	not expressed	yes	8.827	enriched		23.4407	widespread		17.4324	enriched
Cortical Subplate	71	BMA	21.1206	widespread	yes*	4.96951	not expressed	no*	2.86153	not expressed	yes	8.39913	enriched		30.5749	enriched		28.6507	widespread	yes	28.0463	widespread	yes	14.1831	scattered	no	1.79926	sparse	yes	21.568	scattered	yes	0.31627	not expressed	yes	1.8558	not expressed	yes	0.210574	not expressed	yes	12.6331	enriched		22.9903	widespread		14.0441	scattered
Cortical Subplate	72	PA	17.686	widespread	yes*	5.04599	sparse	yes	2.66639	not expressed	yes	7.11353	enriched		32.7108	enriched		21.5571	widespread	yes	25.1712	widespread	yes	13.1782	scattered	yes*	1.01405	not expressed	no	26.0622	widespread	yes	0.340096	not expressed	yes	2.2393	not expressed	yes	0.1949	not expressed	yes	6.70111			30.9229	widespread		5.49023	scattered
Striatum	72.5	AVERAGE	18.2466	widespread	no	4.0817	not expressed	no	2.6718	not expressed	yes	5.06052	enriched		17.1702	enriched		22.0661	widespread	yes	21.0507	widespread	yes	10.4607	enriched	yes*	1.34584	not expressed	yes	11.235	sparse	no*	1.07447	not expressed	yes	2.51621	scattered	yes*	0.548019	restricted, sparse	yes	12.7062	enriched		16.6773	scattered		10.1882	enriched
Striatum	73	CP	20.3894	widespread	yes*	2.93883	not expressed	no*	1.93559	not expressed	yes	1.25384	not expressed		4.12679	sparse		26.7953	widespread	yes	22.5144	widespread	yes	7.52103	sparse	no*	1.33997	not expressed	yes	13.1517	sparse	no*	0.712579	not expressed	yes	1.9538	scattered	yes	0.311218	restricted, sparse	yes	5.80056	sparse		14.3464	scattered		17.9843	scattered
Striatum	74	ACB	21.205	widespread	no	4.50764	not expressed	yes	3.51028	not expressed	yes	1.74605	not expressed		6.97068	sparse		30.1566	widespread	yes	21.5317	widespread	yes	9.22257	sparse	yes*	1.74269	not expressed	yes	21.0782	sparse	no*	2.11457	not expressed	yes	2.50558	scattered	yes	0.524126	not expressed	no*	11.6887			14.4792	scattered		16.4038	scattered
Striatum	75	FS	16.2488	widespread	no	4.25918	not expressed	yes	2.34404	not expressed	yes	1.92974	not expressed		8.93381	sparse		20.4503	widespread	yes	18.8863	widespread	yes	9.1474	sparse	no*	0.58649	not expressed	no	6.58019	scattered	yes	0.46896	not expressed	yes	2.28722	sparse	no*	0.239415	not expressed	yes	12.2052			16.0482	scattered		12.1379	sparse
Striatum	76	OT	14.8627	widespread	no	4.08106	not expressed	yes	1.46224	not expressed	yes	1.52298	not expressed		5.90747	sparse		19.9468	widespread	yes	19.3122	widespread	yes	5.35963	scattered	yes	1.01237	not expressed	yes	11.0588	sparse	no*	0.944544	not expressed	yes	1.37078	scattered	yes	0.133772	not expressed	no*	1.68317	restricted, sparse		3.58076	scattered		9.73691	sparse
Striatum	77	LSc	19.4386	widespread	yes*	2.79635	not expressed	no	2.80206	not expressed	yes	3.32734	not expressed		18.7884	enriched		19.396	widespread	yes	18.1192	widespread	yes	10.1478	sparse	yes	1.21648	not expressed	yes	14.4412	sparse	no*	1.46971	not expressed	yes	1.75384	not expressed	yes	0.333374	not expressed	yes	16.2621	enriched		16.0071	scattered		9.30366	enriched
Striatum	78	LSr	19.8975	widespread	yes*	3.39533	not expressed	no	3.47522	not expressed	yes	2.82033	not expressed		21.8309	enriched		22.585	widespread	yes	20.8666	widespread	yes	11.3502	sparse	yes	1.78566	not expressed	yes	17.5192	sparse	no*	1.52155	not expressed	yes	2.23823	not expressed	yes	0.729961	not expressed	yes	11.202	enriched		20.235	scattered		11.9145	sparse
Striatum	79	LSv	17.4655	widespread	yes*	3.80225	not expressed	no*	2.40537	not expressed	yes	7.45011	sparse		26.4035	enriched		21.1933	widespread	yes	21.3891	widespread	yes	11.4523	sparse	yes	1.41837	not expressed	yes	3.82744	sparse	no*	1.76997	not expressed	yes	2.62634	not expressed	yes	0.42155	not expressed	yes	15.197	enriched		17.8649	scattered		9.38998	sparse
Striatum	80	SF	19.1769	widespread	no	2.90189	not expressed	yes	2.40538	not expressed	yes	8.83245	sparse		19.3676	enriched		17.5054	widespread	yes	18.8897	widespread	yes	10.7798	sparse	yes	1.73869	not expressed	yes	3.77979	sparse	no*	2.04226	not expressed	yes	2.35149	not expressed	yes	0.341068	not expressed	yes	26.902	enriched		16.7852	scattered		10.5818	sparse
Striatum	81	SH	24.0824	widespread	yes*		not expressed	no	4.42303	not expressed	yes	2.07405	not expressed		18.4777	enriched		19.873	widespread	yes	19.9558	widespread	yes	17.3259	sparse	yes	1.65313	not expressed	yes	33.2219	sparse	no*	1.17235	not expressed	yes	2.26771	not expressed	yes	1.32924	not expressed	yes	7.06072	enriched		25.774	scattered		8.66858	restricted
Striatum	82	AAA	16.5944	widespread	yes*	5.28992	not expressed	no*	3.15314	not expressed	yes	4.58193	sparse		17.0344	scattered		20.3743	widespread	yes	22.6498	widespread	yes	10.452	scattered	yes	1.01265	not expressed	no*	5.25534	sparse	yes	0.654547	not expressed	yes	2.61611	scattered	yes	0.41184	restricted, sparse	yes	15.1083			12.4266	scattered		5.79936	scattered
Striatum	83	BA (sagittal - na)	12.7247	na	na	5.32809	na	na	1.85823	not expressed	yes	13.8178	na		27.3332	scattered		21.642	na	na	12.6868	na	na	8.68911	na	na	1.80628	na	na	3.64788	scattered	yes	0.486732	na	na	5.99502	not expressed	no	1.53073	restricted, sparse	yes	16.7938			19.0381	scattered		9.07665	scattered
Striatum	84	CEA	18.5374	widespread	no	4.35256	not expressed	yes	2.83243	not expressed	yes	3.82637	scattered		18.7618	scattered		23.6627	widespread	yes	27.5343	widespread	yes	10.3461	scattered	yes*	1.04875	not expressed	yes	5.92006	sparse	no*	0.413268	not expressed	yes	2.45964	sparse	yes	0.508063	restricted, sparse	yes	12.6791	enriched		16.7381	scattered		7.76696	scattered
Striatum	85	IA	20.2717	widespread	no	3.93914	not expressed	yes	2.5133	not expressed	yes	6.41005	scattered		17.8032	scattered		24.5128	widespread	yes	27.1744	widespread	yes	12.5022	scattered	no	1.37082	not expressed	no*	11.0782	sparse	yes	0.580857	not expressed	yes	1.89557	sparse	no*	0.22731	not expressed	yes	12.3504			18.5376	scattered		7.57146	sparse
Striatum	86	MEA	14.5575	widespread	yes*	5.4699	not expressed	no*	2.28495	not expressed	yes	11.2543	enriched		28.6427	enriched		20.8313	widespread	yes	23.1994	widespread	yes	12.1543	enriched	yes	1.1094	not expressed	no*	6.73032	sparse	yes	0.690712	sparse	yes	2.90558	not expressed	yes	0.630606	not expressed	yes	12.9543	enriched		21.6212	scattered		6.29857	scattered
Pallidum	86.5	AVERAGE	15.4444	widespread	no	3.40865	not expressed	yes	2.24815	not expressed	yes	4.75382	enriched		13.592	enriched		15.1659	scattered	yes	17.687	scattered	yes	8.92277	enriched	yes*	1.2401	not expressed	yes*	7.47291	restricted	yes	1.09451	not expressed	yes	2.59964	restricted, sparse	yes	0.604059	restricted, sparse	yes	9.85373	enriched		13.9707	scattered		7.40836	scattered
Pallidum	87	GPe	14.1927	widespread	no	2.21861	not expressed	yes	1.34838	not expressed	yes	1.06754	not expressed		2.58156	scattered		13.2271	widespread	yes	12.2433	scattered	yes	5.88088	sparse	no*	0.57914	not expressed	yes	5.93015	not expressed	yes	0.238634	not expressed	yes	2.05283	sparse	yes	0.54294	sparse	yes	4.6103			7.97807	scattered		11.4374	scattered
Pallidum	88	GPi	12.1653	widespread	no	2.28462	not expressed	yes	1.12407	not expressed	yes	0.941814	not expressed		3.71123	scattered		8.39278	widespread	yes	9.93801	scattered	yes	7.77681	sparse	no*	0.323861	not expressed	yes	2.8953	not expressed	yes	0.272025	not expressed	yes	2.30953	sparse	yes	0.861627	sparse	yes	4.42858			5.35626	scattered		6.23227	scattered
Pallidum	89	SI	15.8241	widespread	yes*	4.04134	not expressed	no*	2.33072	not expressed	yes	2.03256	scattered		9.29846	scattered		17.9065	scattered	yes	17.7655	scattered	yes	8.07317	sparse	yes	0.869589	not expressed	no*	9.34003	sparse	yes	0.920761	not expressed	yes	2.57297	restricted, sparse	yes	0.352128	sparse	yes	7.23784	scattered		9.42241	scattered		11.1386	sparse
Pallidum	90	MA	17.6836	widespread	yes*	5.54138	not expressed	no*	2.34713	not expressed	yes	3.40149	sparse		15.4973	scattered		17.6386	scattered	yes	17.499	scattered	yes	10.0953	sparse	yes	1.02305	not expressed	no	5.41636	scattered	yes	1.4483	not expressed	yes	2.9708	restricted, sparse	yes	0.432513	restricted, sparse	yes	13.0311	scattered		12.4121	scattered		3.51088	sparse
Pallidum	91	MS	13.7236	widespread	no		not expressed	yes	2.51287	not expressed	yes	3.42297	sparse		14.7675	scattered		14.5101	scattered	yes	18.848	scattered	yes	9.66679	sparse	yes	1.91413	not expressed	yes	13.6672	sparse	no*	1.06294	not expressed	yes	2.78259	restricted, sparse	yes	0.982999	restricted, sparse	yes	12.4054	enriched		24.6509	scattered		6.16321	scattered
Pallidum	92	NDB	16.0041	widespread	no	3.62528	not expressed	yes	3.27327	not expressed	yes	3.11195	scattered		12.5595	scattered		16.1526	scattered	yes	18.1875	scattered	yes	9.04226	scattered	yes	2.60054	not expressed	no*	17.6624	sparse	yes	1.17943	not expressed	yes	3.26881	restricted, sparse	yes	1.05558	restricted, sparse	yes	7.8528			16.5273	scattered		8.40635	sparse
Pallidum	93	TRS	17.6617	widespread	no	2.79016	not expressed	yes	2.05802	not expressed	yes	12.36	enriched		19.0957	enriched		15.9587	scattered	yes	22.068	scattered	yes	12.5121	enriched	no	1.33712	not expressed	yes	3.77781	sparse	no*	1.88476	not expressed	no*	2.37871	not expressed	yes	0.362362	not expressed	yes	23.5058	enriched		19.0902	scattered		9.71582	sparse
Pallidum	94	BST	17.1839	widespread	no	3.87647	not expressed	yes	2.39188	not expressed	yes	4.03619	restricted		23.2882	enriched		19.17	widespread	yes	19.1768	scattered	yes	7.55559	enriched	yes	1.48949	not expressed	no	4.67728	restricted	yes	1.92445	not expressed	yes	2.59038	sparse	yes	0.424774	sparse	yes	8.1532	scattered		11.2365	scattered		6.30871	sparse
Pallidum	95	BAC	14.561	widespread	no	2.89131	not expressed	yes	2.84701	not expressed	yes	12.4099	enriched		21.5282	enriched		13.5366	widespread	yes	23.4568	scattered	yes	9.70204	enriched	no	1.02397	restricted	yes	3.88963	restricted	yes	0.919245	not expressed	yes	2.4701	not expressed	yes	0.421611	not expressed	yes	7.45852	enriched		19.0629	scattered		3.762	sparse
Thalamus	95.5	AVERAGE	17.2911	widespread	no	3.09037	restricted, sparse	yes*	1.75721	not expressed	yes	5.18322	enriched		19.6441	enriched		12.6819	enriched	yes	17.2971	scattered	yes	16.699	scattered	no	1.57224	sparse	yes*	22.2714	widespread	yes	0.624458	not expressed	yes	1.06838	restricted	yes	0.249916	not expressed	yes	5.53876	enriched		16.7393	enriched		15.6014	enriched
Thalamus	96	VAL	16.1812	widespread	no	3.7709	sparse	no*	1.05657	not expressed	yes	0.807403	not expressed		10.8106	not expressed		10.4111	scattered	yes	14.6568	scattered	yes	14.3199	scattered	no	1.30645	sparse	yes	23.8453	widespread	yes	0.688454	not expressed	yes	0.736676	not expressed	yes	0.132508	not expressed	yes	3.16077			12.4829	scattered		20.7117	scattered
Thalamus	97	VM	15.0953	widespread	no	3.3953	sparse	no*	1.46631	not expressed	yes	3.03498	not expressed		10.8638	not expressed		11.8644	scattered	yes	15.3968	scattered	yes	15.9303	scattered	no	1.55965	sparse	yes	25.1483	widespread	yes	1.0473	not expressed	yes	0.911403	not expressed	yes	0.135037	not expressed	yes	4.48462			15.9082	scattered		16.4679	scattered
Thalamus	98	VPL	17.7787	widespread	no	2.77535	sparse	no*	1.09223	not expressed	yes	1.72769	not expressed		4.47867	not expressed		7.88412	scattered	yes	15.3253	scattered	yes	11.2722	scattered	no	0.783828	sparse	yes	21.8501	widespread	yes	0.485045	not expressed	yes	0.787733	not expressed	yes	0.223814	not expressed	yes	2.04856			13.6362	scattered		24.2261	enriched
Thalamus	99	VPLpc (sagittal - na)	13.6261	na	na	3.26448	na	na	0.831509	not expressed	yes	2.28012	na		14.7391	sparse		7.5576	scattered	yes	12.1478	scattered	yes	12.4911	na	na	0.804785	na	na	34.0754	widespread	yes	0.47244	na	na	0.620302	not expressed	yes	0.0953688	not expressed	yes	2.60269			16.524	scattered		24.8247	scattered
Thalamus	100	VPM	19.1532	widespread	no	3.34532	sparse	no*	0.833223	not expressed	yes	1.42669	not expressed		9.41638	not expressed		9.80016	scattered	yes	16.105	scattered	yes	12.7714	scattered	no	1.16583	sparse	yes*	30.1352	widespread	yes	0.437287	not expressed	yes	0.603315	not expressed	yes	0.105785	not expressed	yes	2.32527			16.3063	scattered		26.4352	enriched
Thalamus	101	VPMpc	14.8222	widespread	no	3.76094	not expressed	yes	1.03403	not expressed	yes	2.73305	not expressed		21.7326	enriched		10.9147	scattered	yes	11.756	scattered	yes	12.8139	scattered	no	2.20868	sparse	yes*	32.8896	widespread	yes	0.805821	not expressed	yes	0.623725	not expressed	yes	0.0662872	not expressed	yes	4.41551			18.1259	scattered		18.7461	scattered
Thalamus	102	SPFm (sagittal - na)	15.545	na	na	3.46384	na	na	1.88372	not expressed	yes	13.5401	na		26.8083	scattered		16.3227	na	na	15.3219	na	na	15.9896	na	na	1.76949	na	na	30.1329	widespread	yes	1.01931	na	na	0.687377	not expressed	yes	0.106354	not expressed	yes	5.43386			23.5444	scattered		15.2045	scattered
Thalamus	103	SPFp	15.0258	widespread	no	3.38261	sparse	no*	1.40272	not expressed	yes	7.44338	restricted		17.8886	enriched		10.8515	scattered	yes	13.7867	scattered	yes	13.5146	scattered	yes*	0.69389	not expressed	no*	22.9083	sparse	yes	0.883902	sparse	no*	0.77545	not expressed	yes	0.126184	not expressed	yes	3.98801			14.5804	scattered		15.0709	scattered
Thalamus	104	SPA	14.6677	widespread	yes*				2.26379	not expressed	yes	9.93843	scattered		25.1659	scattered		13.0981	scattered	yes	15.182	scattered	yes	14.889	scattered	no	1.76693	sparse	yes*	23.3665	widespread	yes	0.698615	not expressed	yes	0.611948	not expressed	yes	0.0579645	not expressed	yes	5.04247	sparse		17.2563	scattered		10.2898	scattered
Thalamus	105	PP	17.4195	widespread	no	3.15784	sparse	no*	3.47073	not expressed	yes	6.79119	restricted		22.5942	scattered		12.8071	scattered	yes	15.7162	scattered	yes	10.7016	scattered	no	0.582367	not expressed	yes	12.0955	not expressed	yes	0.465202	not expressed	yes	1.10607	not expressed	yes	0.22176	not expressed	yes	3.6868			12.1639	scattered		10.3912	scattered
Thalamus	106	MGd	22.8624	widespread	no	2.62029	sparse	no*	2.39524	not expressed	yes	3.99965	restricted		21.732	sparse		13.5691	na	na	19.4974	na	na	15.9295	scattered	yes*	1.21122	sparse	yes*	28.3068	widespread	yes	0.480713	not expressed	yes	0.79657	not expressed	yes	0.13792	not expressed	yes	3.54273			18.0502	scattered		17.4476	scattered
Thalamus	107	MGv (sagittal - na)	23.0166	na	na	2.36563	na	na	2.67712	not expressed	yes	3.78202	na		19.5713	sparse		15.5718	na	na	19.0829	na	na	14.7338	na	na	1.08197	na	na	25.2948	widespread	yes	0.500904	na	na	0.949922	not expressed	yes	0.210573	not expressed	yes	2.90871			21.1653	scattered		16.373	scattered
Thalamus	108	MGm (sagittal - na)	18.5672	na	na	2.64325	na	na	1.89418	not expressed	yes	4.11165	na		13.7142	sparse		13.5268	na	na	17.528	na	na	14.3088	na	na	0.766602	na	na	25.3176	widespread	yes	0.786893	na	na	0.69473	not expressed	yes	0.129822	not expressed	yes	3.01499			16.8144	scattered		17.2266	scattered
Thalamus	109	LGd	20.1219	widespread	no	2.42225	sparse	no*	1.63897	not expressed	yes	1.91047	not expressed		25.9356	scattered		13.2575	scattered	yes	19.8551	scattered	yes	12.8768	scattered	no	0.853265	sparse	yes*	27.758	widespread	yes	0.376002	not expressed	yes	0.89273	not expressed	yes	0.126702	not expressed	yes	2.57112	not expressed		19.0025	scattered		24.4582	scattered
Thalamus	110	LP	23.2572	widespread	no	3.291	sparse	no*	1.70328	not expressed	yes	4.2205	restricted, sparse		18.7107	enriched		13.9415	scattered	yes	17.3251	scattered	yes	17.0482	scattered	no	2.14249	sparse	yes*	27.5014	widespread	yes	0.905329	not expressed	yes	0.724746	not expressed	yes	0.121732	not expressed	yes	4.96384			16.0548	scattered		12.4621	scattered
Thalamus	111	PO	19.9158	widespread	no	3.39967	not expressed	yes	0.84046	not expressed	yes	1.3839	not expressed		15.6605	scattered		10.107	scattered	yes	16.118	scattered	yes	15.3947	scattered	no	2.02136	sparse	yes*	27.9263	widespread	yes	0.784657	not expressed	yes	0.619545	not expressed	yes	0.112257	not expressed	yes	5.14453			14.2582	scattered		16.1453	scattered
Thalamus	112	POL (sagittal - na)	18.0022	na	na	3.42963	na	na	1.69604	not expressed	yes	5.69196	na		16.8569	scattered		14.2744	na	na	17.355	na	na	16.1812	na	na	1.06668	na	na	25.0611	widespread	yes	0.608827	na	na	0.628058	not expressed	yes	0.12767	not expressed	yes	4.01447			14.1866	scattered		15.0768	scattered
Thalamus	113	SGN (sagittal - na)	20.8528	na	na	2.85001	na	na	2.46032	not expressed	yes	7.5105	na		19.0065	scattered		15.649	na	na	19.7807	na	na	16.6614	na	na	1.15501	na	na	27.7131	widespread	yes	0.560568	na	na	0.678447	not expressed	yes	0.145299	not expressed	yes	3.71869			16.1849	scattered		16.5696	scattered
Thalamus	114	AV	19.622	widespread	no	3.62254	sparse	no*	1.76752	not expressed	yes	2.47877	not expressed		19.4732	widespread		15.595	enriched	yes*	14.7048	scattered	yes	14.4389	scattered	no	2.22538	sparse	yes*	11.0735	widespread	yes	1.57448	not expressed	yes	1.94383	not expressed	yes	0.570798	not expressed	yes	8.12588			15.5436	scattered		11.832	scattered
Thalamus	115	AMd	16.6913	widespread	no	3.76598	not expressed	yes	1.95246	not expressed	yes	5.15148	not expressed		14.6616	sparse		15.5487	scattered	yes	16.9389	scattered	yes	20.9243	scattered	no	2.5566	sparse	yes*	24.4787	widespread	yes	0.437388	not expressed	yes	1.59543	not expressed	yes	0.294361	not expressed	yes	5.43243			16.3656	scattered		12.8772	scattered
Thalamus	116	AMv (sagittal - na)	15.1242	na	na	3.46824	na	na	1.92471	not expressed	yes	6.02927	na		14.2389	sparse		14.1012	scattered	yes	16.9641	scattered	yes	18.5477	na	na	1.9931	na	na	28.2156	widespread	yes	0.539321	na	na	2.08326	not expressed	yes	0.278161	not expressed	yes	8.30957			19.0818	scattered		6.8008	scattered
Thalamus	117	AD	18.4144	widespread	no	3.72523	restricted, sparse	no	2.04812	not expressed	yes	1.29651	not expressed		28.81	enriched		11.8224	scattered	yes	16.1157	scattered	yes	14.451	scattered	no	1.81376	sparse	yes*	4.93431	widespread	yes	1.23528	not expressed	yes	1.65714	not expressed	yes	0.542454	not expressed	yes	13.1398			15.1851	scattered		11.5229	scattered
Thalamus	118	IAM	16.4312	widespread	no				2.55721	not expressed	yes	7.28496	not expressed		28.8766	enriched		15.8582	scattered	yes	20.4952	scattered	yes	21.6419	scattered	no	3.01022	sparse	yes*	16.2092	widespread	yes	0.328946	not expressed	yes	1.0265	not expressed	yes	0.455482	not expressed	yes	3.74462			18.1061	scattered		10.4621	scattered
Thalamus	119	IAD	17.672	widespread	no	3.94287	restricted, sparse	no	1.78207	not expressed	yes	4.8458	restricted		24.9816	sparse		15.4073	scattered	yes	19.1769	scattered	yes	24.5394	scattered	no	2.95558	not expressed	no	14.3519	widespread	yes	0.355918	not expressed	yes	1.43725	not expressed	yes	0.673721	not expressed	yes	4.09779			16.7308	scattered		11.4295	scattered
Thalamus	120	LD	18.146	widespread	no	3.30634	sparse	no*	1.48094	not expressed	yes	1.95448	restricted, sparse		25.8259	enriched		16.6197	scattered	yes	16.3582	scattered	yes	11.4834	scattered	no	1.26886	sparse	yes*	22.209	widespread	yes	0.976242	not expressed	yes	0.790083	not expressed	yes	0.18529	not expressed	yes	3.76914			13.0474	scattered		14.2977	sparse
Thalamus	121	IMD	15.455	widespread	no				1.53659	not expressed	yes	4.99072	sparse		30.6893	widespread		12.701	scattered	yes	18.9286	scattered	yes	20.8746	scattered	no	1.7543	not expressed	no	27.0106	widespread	yes	0.331103	not expressed	yes	0.785915	not expressed	yes	0.163117	not expressed	yes	5.49108	sparse		17.2153	scattered		14.1512	scattered
Thalamus	122	MD	16.0288	widespread	no	3.46134	sparse	no*	1.51882	not expressed	yes	4.52948	not expressed		21.8016	enriched		11.6974	scattered	yes	19.9306	scattered	yes	22.9996	scattered	no	1.89181	sparse	yes*	23.0362	widespread	yes	0.350292	not expressed	yes	0.782654	not expressed	yes	0.264864	not expressed	yes	7.37601	restricted, sparse		15.0846	scattered		16.3252	scattered
Thalamus	123	SMT	14.4534	widespread	no	2.34947	not expressed	yes	1.64616	not expressed	yes	3.29616	not expressed		10.1141	not expressed		12.0403	scattered	yes	19.2245	scattered	yes	18.7394	scattered	no	1.65868	sparse	yes*	29.5854	widespread	yes	0.47475	not expressed	yes	0.789587	not expressed	yes	0.108715	not expressed	yes	9.20227			14.2004	scattered		16.7955	scattered
Thalamus	124	PR	15.1372	widespread	no	2.89286	not expressed	yes	1.67804	not expressed	yes	3.88125	sparse		13.3333	scattered		16.203	scattered	yes	19.9431	scattered	yes	21.1885	scattered	no	1.52816	sparse	yes*	28.9507	widespread	yes	1.24332	not expressed	yes	0.852496	not expressed	yes	0.167317	not expressed	yes	11.1068			17.4747	scattered		10.9239	scattered
Thalamus	125	PVT	15.7228	widespread	no	2.67446			1.75034	not expressed	yes	17.0573	enriched		32.9707	enriched		13.4306	scattered	yes	22.5085	scattered	yes	21.9535	scattered	no	1.34468	not expressed	no	7.66941	widespread	yes	0.456557	not expressed	yes	2.10859	not expressed	yes	0.539178	not expressed	yes	5.92354			17.9735	scattered		9.44651	sparse
Thalamus	126	PT	16.914	widespread	no	3.0702	restricted, sparse	no	1.09482	not expressed	yes	14.5879	restricted		33.3803	widespread		13.5151	scattered	yes	20.6249	scattered	yes	20.1935	scattered	no	1.83293	not expressed	no	2.74258	widespread	yes	0.370195	not expressed	yes	2.24279	not expressed	yes	0.523448	not expressed	yes	6.67715			18.2063	scattered		2.20163	scattered
Thalamus	127	RE	16.8167	widespread	no	3.08061	not expressed	yes	2.77258	not expressed	yes	13.8893	scattered		30.1788	enriched		14.0721	scattered	yes	20.4595	scattered	yes	17.825	scattered	no	1.89742	sparse	yes*	21.0838	widespread	yes	0.722819	not expressed	yes	1.2719	not expressed	yes	0.214525	not expressed	yes	11.7858	enriched		18.7851	scattered		6.81244	scattered
Thalamus	128	RH	16.4199	widespread	no	1.93718	not expressed	yes	2.03274	not expressed	yes	6.18263	sparse		22.4382	scattered		14.0622	scattered	yes	19.7043	scattered	yes	16.3865	scattered	no	2.56435	sparse	yes*	29.9834	widespread	yes	0.331953	not expressed	yes	0.716156	not expressed	yes	0.126477	not expressed	yes	15.4577	enriched		18.8076	scattered		17.3871	scattered
Thalamus	129	CM	16.0807	widespread	no	2.75009	sparse	no*	1.6006	not expressed	yes	7.82181	not expressed		26.7659	enriched		14.1315	scattered	yes	19.8183	scattered	yes	17.9517	scattered	no	2.65219	sparse	yes*	26.4726	widespread	yes	0.42855	not expressed	yes	0.837878	not expressed	yes	0.276662	not expressed	yes	5.50164			17.8565	scattered		15.5413	scattered
Thalamus	130	PCN	16.7026	widespread	no	3.71498	sparse	no*	1.35874	not expressed	yes	0.654279	not expressed		16.7966	enriched		12.1039	scattered	yes	16.9168	scattered	yes	19.2754	scattered	no	3.09256	sparse	yes*	30.5138	widespread	yes	0.442449	not expressed	yes	0.525365	not expressed	yes	0.109284	not expressed	yes	4.71581			13.1018	scattered		19.4363	scattered
Thalamus	131	CL	19.5535	widespread	no	4.066	restricted, sparse	no	1.01729	not expressed	yes	2.40925	scattered		21.9087	enriched		13.4954	scattered	yes	16.9547	scattered	yes	18.7326	scattered	no	2.10754	sparse	yes*	28.9595	widespread	yes	0.724611	not expressed	yes	0.61289	not expressed	yes	0.137779	not expressed	yes	6.68296			13.5733	scattered		15.6602	scattered
Thalamus	132	PF	17.8048	widespread	no	3.52401	restricted, sparse	no	1.15375	not expressed	yes	5.98198	scattered		18.4578	sparse		11.7782	scattered	yes	16.1688	scattered	yes	19.058	scattered	no	1.31588	not expressed	no	26.6776	widespread	yes	0.590107	not expressed	yes	0.797424	not expressed	yes	0.0865365	not expressed	yes	10.9894	restricted		15.0069	scattered		14.8248	scattered
Thalamus	133	RT	14.6535	widespread	no	2.82816	not expressed	yes	1.38319	not expressed	yes	1.4803	not expressed		7.0845	not expressed		6.51876	scattered	yes	12.5587	scattered	yes	8.37719	scattered	no	0.8029	not expressed	no	5.93119	widespread	yes	0.53599	not expressed	yes	1.33753	not expressed	yes	0.391585	not expressed	yes	3.64724			10.2778	scattered		11.8549	scattered
Thalamus	134	IGL	17.556	widespread	no	2.43558	not expressed	yes	1.44801	not expressed	yes	1.73588	sparse		18.6053	scattered		10.3545	scattered	yes	17.3101	scattered	yes	15.1208	scattered	no	0.767157	sparse	no*	21.0169	sparse	no*	0.174805	not expressed	yes	1.08212	not expressed	yes	0.149909	not expressed	yes	1.97373	not expressed		19.5372	scattered		17.2858	sparse
Thalamus	135	LGv	16.7596	widespread	yes*	2.35918	not expressed	no	1.49853	not expressed	yes	1.89881	not expressed		17.7719	scattered		11.6456	scattered	yes	16.0129	scattered	yes	14.4243	scattered	no	0.843926	sparse	no*	10.9532	sparse	no*	0.204923	not expressed	yes	1.04488	not expressed	yes	0.177539	not expressed	yes	2.43432	not expressed		20.5138	scattered		13.9245	scattered
Thalamus	136	SubG	15.4335	widespread	no	2.46269	not expressed	yes	2.05831	not expressed	yes	1.6903	sparse		10.3246	sparse		8.62759	scattered	yes	14.1803	scattered	yes	14.1704	scattered	no	0.521635	sparse	yes	7.84297	widespread	yes	0.266408	not expressed	yes	0.996655	not expressed	yes	0.186589	not expressed	yes	3.53463			13.7287	scattered		15.8739	scattered
Thalamus	137	MH	16.9387	widespread	no	2.50885			3.86578	not expressed	yes	10.4285	enriched		20.2563	enriched		11.2426	sparse	no*	20.4766	sparse	no*	24.0903	scattered	no	1.17409	not expressed	no	18.6091	widespread	yes	0.928765	not expressed	yes	2.98321	restricted	yes	1.28783	not expressed	no	6.38079	not expressed		29.6457	enriched		35.4319	enriched
Thalamus	138	LH	17.0751	widespread	no	2.32968	not expressed	yes	1.99225	not expressed	yes	8.98759	scattered		19.2655	scattered		11.3393	scattered	yes	19.3615	scattered	yes	22.8422	scattered	no	1.0922	not expressed	yes	17.8313	not expressed	yes	0.819236	not expressed	yes	2.19015	not expressed	yes	0.451741	not expressed	yes	5.59881	restricted, sparse		18.4932	scattered		19.6343	sparse
Hypothalamus	138.5	AVERAGE	16.0232	widespread	no	3.56946	sparse	no	2.8886	restricted	yes	8.37376	enriched		23.68	enriched		12.8492	scattered	yes	15.0188	widespread	yes	12.3148	enriched	yes*	1.60281	not expressed	no	6.75014	enriched	yes	1.53399	not expressed	yes	2.70526	restricted, sparse	no	0.530784	not expressed	yes	8.41386	enriched		18.1823	enriched		6.60978	sparse
Hypothalamus	139	SO	11.9368	widespread	no	2.71373	not expressed	yes	2.26582	not expressed	yes	5.97088	scattered		14.6696	widespread		11.8483	scattered	yes	5.7204	widespread	yes	7.86489	enriched	no	0.629842	not expressed	no*	2.76619	sparse	yes	2.03081	not expressed	yes	4.84315	not expressed	yes	2.03392	not expressed	yes	8.06275			15.063	scattered		8.84379	sparse
Hypothalamus	140	ASO (NC) (sagittal - na)		na	na		na	na		not expressed	yes		na			widespread			na	na		na	na		na	na		na	na		not expressed	yes		na	na		not expressed	yes		not expressed	yes					scattered			scattered
Hypothalamus	141	PVH	16.6794	widespread	no		not expressed	yes	3.87425	restricted, sparse	no	14.6471	scattered		29.2266	widespread		15.2689	scattered	yes	21.9614	widespread	yes	19.3116	enriched	no	1.48507	not expressed	no*	9.43613	sparse	yes	1.15122	not expressed	yes	1.77728	not expressed	yes	0.402019	not expressed	yes	8.83245			16.3044	scattered		3.20015	sparse
Hypothalamus	142	PVa (sagittal - na)	18.7432	na	na		na	na	4.64261	not expressed	yes	15.3983	na		33.0015	widespread		13.2185	na	na	22.1505	na	na	15.2802	na	na	1.24568	na	na	6.24472	not expressed	yes	1.83244	na	na	2.13218	not expressed	yes	0.426593	not expressed	yes	7.70551			25.6509	scattered		5.6651	not expressed
Hypothalamus	143	PVi (sagittal - na)	19.0519	na	na		na	na	4.40934	sparse	yes	17.4413	na		22.4215	widespread		18.0429	na	na	22.0661	na	na	13.746	na	na	1.86367	na	na	11.1804	not expressed	yes	1.83019	na	na	1.79733	not expressed	yes	0.28758	not expressed	yes	7.54319			19.1702	scattered		5.87191	not expressed
Hypothalamus	144	ARH	7.75407	widespread	no				11.2946	restricted	yes	11.855	enriched		30.4461	enriched		7.99101	enriched	yes	0.867083	enriched	yes	7.41363	enriched	yes	1.5749	not expressed	no*	4.52422	sparse	yes	1.02556	not expressed	yes	1.05781	not expressed	yes	0.176179	not expressed	yes	9.66279			17.9735	scattered		4.81071	sparse
Hypothalamus	145	ADP (sagittal - na)	16.2309	na	na		na	na	2.69805	not expressed	yes	6.26574	na		27.0096	widespread		15.0675	na	na	26.2373	na	na	9.08721	na	na	1.95112	na	na	3.81145	sparse	yes	0.961863	na	na	3.93452	not expressed	yes	0.804769	not expressed	yes	9.88123			15.1297	scattered		4.84267	not expressed
Hypothalamus	146	AVP (sagittal - na)	14.2594	na	na	3.34217	na	na	1.20999	not expressed	yes	4.97996	na		18.5105	widespread		10.9694	na	na	13.3637	na	na	9.85112	na	na	1.19607	na	na	5.07948	sparse	yes	1.5615	na	na	4.21179	restricted, sparse	no	0.620453	not expressed	yes	7.81019			14.8806	scattered		4.06297	sparse
Hypothalamus	147	AVPV	15.4537	widespread	no	3.5981			1.44346	not expressed	yes	8.12117	sparse		24.2514	widespread		13.4509	na	na	16.8159	na	na	11.1519	scattered	yes	1.82763	not expressed	no*	4.29622	sparse	yes	1.73523	not expressed	yes	6.00342	restricted, sparse	no	0.992026	not expressed	yes	5.44762			14.9853	scattered		7.52574	not expressed
Hypothalamus	148	DMH	19.8739	widespread	no	5.90723	scattered	no	2.87717	not expressed	yes	13.9329	scattered		22.2247	widespread		21.1468	scattered	yes	21.5391	widespread	yes	15.468	enriched	no	3.34342	not expressed	no*	15.5629	enriched	yes	2.40233	not expressed	yes	1.62238	not expressed	yes	0.267156	not expressed	yes	10.5123			22.5469	enriched		7.92704	sparse
Hypothalamus	149	MEPO	14.5541	widespread	no				2.49668	not expressed	yes	9.19087	scattered		23.4257	widespread		14.0595	scattered	yes	24.5515	widespread	yes	11.8077	scattered	yes	1.8801	not expressed	no*	3.75641	sparse	yes	1.06862	not expressed	yes	4.3281	restricted, sparse	no	1.16522	not expressed	yes	13.4659			16.3968	scattered		8.21467	sparse
Hypothalamus	150	MPO	15.3297	widespread	no	2.96466	not expressed	yes	2.39418	not expressed	yes	6.65499	not expressed		25.3349	widespread		13.6073	scattered	yes	18.6971	widespread	yes	10.2878	scattered	yes	1.87368	not expressed	no*	4.51661	sparse	yes	1.46961	not expressed	yes	4.2145	restricted, sparse	no	0.807279	not expressed	yes	10.2167			14.3303	scattered		4.33945	sparse
Hypothalamus	151	OV (sagittal - na)	16.9034	na	na		na	na	3.33811	not expressed	yes	8.31258	na			widespread		16.6206	na	na	25.5327	na	na	13.2047	na	na	1.55577	na	na	3.98043	sparse	yes	1.23845	na	na	6.22401	restricted, sparse	no	1.77615	not expressed	yes					scattered			scattered
Hypothalamus	152	PD (sagittal - na)		na	na		na	na	3.31872	not expressed	yes		na		35.835	widespread			na	na		na	na		na	na		na	na	4.84803	sparse	yes		na	na	2.852	not expressed	yes	0.440947	not expressed	yes	6.98548			14.1228	scattered		1.59967	sparse
Hypothalamus	153	PS (sagittal - na)	17.3869	na	na	3.00052	na	na	2.25652	not expressed	yes	4.46332	na		23.5439	widespread		13.5807	na	na	25.079	na	na	7.65761	na	na	1.28425	na	na	5.50184	sparse	yes	1.21069	na	na	3.37716	not expressed	yes	0.487628	not expressed	yes	6.9013			10.7082	scattered		2.71906	not expressed
Hypothalamus	154	PVp	12.7253	widespread	no	2.37736			2.97588	not expressed	yes	6.66724	scattered		28.1074	enriched		7.93363	na	na	0.527576	na	na	15.7093	sparse	yes	1.37416	not expressed	yes	9.82107	not expressed	yes	1.56391	not expressed	yes	1.66583	not expressed	yes	0.543898	not expressed	yes	10.8587			26.506	enriched		4.53921	sparse
Hypothalamus	155	Pvpo (sagittal - na)	18.3777	na	na		na	na	3.496	not expressed	yes	9.79842	na		23.9274	widespread		11.2614	na	na	22.8371	na	na	13.5547	na	na	1.24712	na	na	3.73024	sparse	yes	1.74403	na	na	5.0068	not expressed	yes	1.14152	not expressed	yes	8.25366			15.7276	scattered		5.38807	not expressed
Hypothalamus	156	SBPV (sagittal - na)	18.4657	na	na		na	na	3.60789	not expressed	yes	10.6233	na		28.2598	widespread		14.4406	na	na	24.8901	na	na	15.008	na	na	1.76367	na	na	7.2163	not expressed	yes	1.68498	na	na	1.90578	not expressed	yes	0.285834	not expressed	yes	9.22782			22.3328	scattered		6.82989	sparse
Hypothalamus	157	SCH	13.3499	widespread	no				2.55021	restricted, sparse	no	9.0865	sparse		29.555	enriched		9.51599	scattered	yes	22.8762	widespread	yes	9.57505	scattered	no	1.35556	not expressed	no	5.19044	restricted, sparse	yes	1.54372	not expressed	yes	3.52059	not expressed	yes	0.514519	not expressed	yes	8.4929			25.8511	scattered		4.30553	not expressed
Hypothalamus	158	SFO	19.3485	widespread	no				3.86795	not expressed	yes	17.0671	enriched			widespread		14.8557	scattered	yes	25.0012	widespread	yes	22.6118	scattered	no	1.34251	not expressed	yes	1.54358	not expressed	yes	1.70346	not expressed	yes	1.56646	not expressed	yes	0.473547	not expressed	yes					scattered			not expressed
Hypothalamus	159	VLPO (sagittal - na)	8.64906	na	na	2.52678	na	na	0.826963	not expressed	yes	2.93826	na		13.9545	widespread		9.4296	na	na	4.77522	na	na	5.07775	na	na	0.325829	na	na	4.90787	sparse	yes	1.13634	na	na	3.64246	sparse	no*	0.385238	not expressed	yes	4.46525			12.2807	scattered		3.80207	sparse
Hypothalamus	160	AHN	18.474	widespread	no	3.2419	sparse	no*	2.62851	not expressed	yes	7.86946	scattered		27.3766	widespread		14.6479	scattered	yes	21.8093	widespread	yes	17.2636	scattered	yes	1.97748	not expressed	yes	8.65676	not expressed	yes	2.07631	not expressed	yes	2.0317	not expressed	yes	0.343892	not expressed	yes	10.1416			19.2767	scattered		6.2113	scattered
Hypothalamus	161	LM	13.6542	widespread	no	3.21847	sparse	no*	2.37096	not expressed	yes	4.56933	scattered		19.5387	widespread		9.51335	scattered	yes	2.76564	widespread	yes	8.00382	enriched	no	0.300202	not expressed	no*	5.00803	sparse	yes	1.2986	not expressed	yes	1.95558	not expressed	yes	0.278013	not expressed	yes	7.59309	enriched		13.021	scattered		7.72111	scattered
Hypothalamus	162	MM	15.7258	widespread	no	4.33347	scattered	no	3.69295	not expressed	yes	2.9138	not expressed		18.939	sparse		8.08514	scattered	yes	8.30742	widespread	yes	20.6056	enriched	yes	0.567525	not expressed	no	9.30727	widespread	yes	0.929913	not expressed	yes	2.13233	not expressed	yes	0.513159	not expressed	yes	11.961	enriched		21.2031	enriched		5.34857	sparse
Hypothalamus	163	SUM	19.2382	widespread	no	4.70543	scattered	no	2.2374	not expressed	yes	8.71107	scattered		24.8329	enriched		10.7028	scattered	yes	10.2301	widespread	yes	14.8661	sparse	no*	1.88115	not expressed	no	6.20289	scattered	yes	1.85021	not expressed	yes	1.87119	not expressed	yes	0.332209	not expressed	yes	8.51611			21.4183	scattered		8.83797	sparse
Hypothalamus	164	TMd	20.2317	widespread	no				4.10694	not expressed	yes	7.81253	scattered		20.0683	widespread		14.1323	scattered	yes		widespread	yes	23.3294	scattered	yes	1.99814	not expressed	no	5.29045	enriched	yes	2.45614	not expressed	yes	1.26704	not expressed	yes	0.195928	not expressed	yes	12.4812			11.7645	scattered		1.73795	not expressed
Hypothalamus	165	TMv (sagittal - na)	10.0056	na	na	1.8849	na	na	2.17402	not expressed	yes	3.04709	na		13.3591	widespread		9.83171	na	na	1.72297	na	na	5.35407	na	na	0.184899	na	na	5.60084	sparse	yes	0.4796	na	na	1.86707	not expressed	yes	0.232323	not expressed	yes	10.9972			18.3084	scattered		7.18718	not expressed
Hypothalamus	166	MPN	17.5613	widespread	no	3.19014	not expressed	yes	2.46938	not expressed	yes	7.64307	scattered		31.2537	widespread		14.6066	scattered	yes	17.1107	widespread	yes	13.0549	scattered	no	3.12337	not expressed	no*	4.8444	sparse	yes	4.52533	not expressed	yes	5.76981	not expressed	yes	1.12493	not expressed	yes	10.2805			14.2499	scattered		3.73067	sparse
Hypothalamus	167	PMd	20.8684	widespread	no	5.44757	sparse	no*	3.57659	not expressed	yes	9.29752	scattered		20.5809	scattered		19.7721	scattered	yes	8.1747	widespread	yes	14.8727	scattered	no	1.75708	not expressed	no	8.90454	restricted	yes	1.86099	not expressed	yes	2.02015	not expressed	yes	0.251746	not expressed	yes	8.1008			21.606	scattered		8.07345	not expressed
Hypothalamus	168	PMv	19.096	widespread	no	3.63507	sparse	no*	2.03376	not expressed	yes	9.75136	enriched		25.4625	enriched		18.0362	scattered	yes	1.48548	widespread	yes	11.1003	scattered	yes	1.016	not expressed	no*	7.73204	sparse	yes	1.07046	not expressed	yes	1.51537	not expressed	yes	0.197617	not expressed	yes	8.20265			24.6355	enriched		6.32529	not expressed
Hypothalamus	169	PVHd (sagittal - na)	17.0536	na	na	5.13631	na	na	2.64539	not expressed	yes	14.1644	na		25.1224	widespread		12.1429	na	na	20.751	na	na	13.9622	na	na	1.33462	na	na	15.0979	sparse	yes	1.67661	na	na	1.60124	not expressed	yes	0.200305	not expressed	yes	7.31708			21.4784	scattered		7.25423	sparse
Hypothalamus	170	VMH	16.2541	widespread	no	2.5839	sparse	no*	4.4254	not expressed	yes	11.5639	scattered		33.936	enriched		15.6469	scattered	yes	13.8692	widespread	yes	10.446	scattered	no	7.00879	not expressed	yes	3.7032	not expressed	yes	2.12446	not expressed	yes	1.88863	not expressed	yes	0.197322	not expressed	yes	5.57544			25.5843	scattered		8.55669	scattered
Hypothalamus	171	PH	17.1256	widespread	no	5.04081	scattered	no	2.48131	not expressed	yes	15.9073	scattered		26.0001	widespread		15.9597	scattered	yes	15.0799	widespread	yes	11.8907	sparse	yes	1.70132	not expressed	no*	19.8489	sparse	yes	1.33037	not expressed	yes	1.23358	sparse	no*	0.234116	not expressed	yes	8.66215	enriched		23.2837	scattered		10.0811	scattered
Hypothalamus	172	LHA	16.7453	widespread	no	4.43464	not expressed	yes	1.9793	not expressed	yes	6.07075	scattered		20.136	widespread		13.3394	scattered	yes	15.4099	widespread	yes	12.2443	scattered	yes*	1.35355	not expressed	no*	6.03106	sparse	yes	1.43983	not expressed	yes	2.09555	not expressed	yes	0.493194	not expressed	yes	9.14861			17.0078	scattered		7.54463	scattered
Hypothalamus	173	LPO	16.0955	widespread	no	3.66943	sparse	no*	2.47301	not expressed	yes	3.44265	scattered		18.522	widespread		13.0348	scattered	yes	17.1746	widespread	yes	9.00799	sparse	yes	1.43001	not expressed	no*	4.21916	sparse	yes	1.56757	not expressed	yes	3.26984	sparse	no*	0.564689	not expressed	yes	11.5337			12.9553	scattered		3.70155	sparse
Hypothalamus	174	PST (sagittal - na)		na	na		na	na		not expressed	yes		na			widespread			na	na		na	na		na	na		na	na		sparse	yes		na	na		not expressed	yes		not expressed	yes					scattered			scattered
Hypothalamus	175	PSTN	21.1824	widespread	yes*	5.30203	restricted, sparse	no	1.46623	not expressed	yes	8.1615	scattered		26.3414	widespread		14.088	scattered	yes	13.365	widespread	yes	12.4354	scattered	no	1.20243	not expressed	no*	5.09001	sparse	yes	1.20729	not expressed	yes	1.31594	not expressed	yes	0.293873	not expressed	yes	6.39123			19.7739	scattered		10.8702	scattered
Hypothalamus	176	RCH	10.3301	widespread	no	1.29393	not expressed	yes	1.66465	not expressed	yes	4.41281	scattered		17.6594	widespread		6.22319	scattered	yes	10.8698	widespread	yes	7.55693	scattered	yes	2.40606	not expressed	yes	5.62666	not expressed	yes	0.697194	not expressed	yes	3.5116	not expressed	yes	0.464982	not expressed	yes	3.37273			20.6681	scattered		8.61928	sparse
Hypothalamus	177	STN	19.2057	widespread	yes*	3.736	restricted, sparse	yes*	1.04948	not expressed	yes	2.8667	sparse		21.9983	enriched		8.79355	scattered	yes	12.4034	widespread	yes	10.706	sparse	no*	0.987691	not expressed	no*	5.95835	sparse	yes	0.938369	not expressed	yes	1.04093	not expressed	yes	0.244758	not expressed	yes	5.71857			13.8185	scattered		14.3863	scattered
Hypothalamus	178	TU	9.39724	widespread	no	1.83835	sparse	no*	1.98413	not expressed	yes	3.3268	scattered		20.7828	widespread		7.98596	scattered	yes	5.80022	widespread	yes	3.19789	sparse	yes	0.642369	not expressed	yes	3.22074	not expressed	yes	0.658456	not expressed	yes	2.38613	restricted, sparse	no	0.294121	not expressed	yes	6.43369			15.5753	scattered		8.17756	sparse
Hypothalamus	179	ZI	15.5636	widespread	no	3.683	not expressed	yes	1.35172	not expressed	yes	3.25574	not expressed		10.5462	sparse		9.41631	scattered	yes	13.8759	widespread	yes	14.3941	enriched	no	0.914102	not expressed	yes	14.9978	not expressed	yes	1.20894	not expressed	yes	1.04808	not expressed	yes	0.210917	not expressed	yes	4.55986	enriched		17.1539	scattered		15.7092	scattered
Midbrain	179.5	AVERAGE	18.2406	widespread	no	3.74817	sparse	no	1.75379	not expressed	yes	4.50054	enriched		15.826	scattered		10.7687	scattered	yes	14.5456	scattered	yes	13.6661	scattered	no	1.3185	restricted, sparse	no	9.93147	enriched	yes*	1.29534	not expressed	no	2.00029	restricted	yes	0.311431	not expressed	no	7.54378	enriched		15.6476	enriched		12.1934	enriched
Midbrain	180	SCs	16.7009	widespread	no	4.41798	sparse	no*	2.92832	not expressed	yes	3.47736	sparse		14.6202	sparse		15.5368	scattered	yes	17.0671	scattered	yes	17.0174	widespread	yes*	3.92331	sparse	yes	14.8078	enriched	yes*	1.9278	not expressed	no	2.22835	not expressed	yes	0.530325	not expressed	yes	7.17445			19.7123	scattered		13.0328	scattered
Midbrain	181	ICc	18.7683	widespread	no	4.54913	sparse	no*	1.03559	not expressed	yes	3.43318	sparse		11.3629	scattered		16.7616	scattered	yes	17.618	scattered	yes	13.2479	sparse	no*	2.28501	sparse	yes	20.6087	scattered	yes	2.71636	not expressed	yes	1.10535	not expressed	yes	0.318328	not expressed	yes	19.4017	enriched		15.6433	scattered		17.2419	scattered
Midbrain	182	ICd (sagittal - na)	12.6759	na	na	3.56251	na	na	0.899702	not expressed	yes	3.91145	na		14.4357	scattered		13.0094	na	na	15.2914	na	na	13.2006	na	na	2.03882	na	na	14.0395	scattered	yes	2.04976	na	na	1.16958	not expressed	yes	0.330644	not expressed	yes	14.6022	enriched		14.0236	scattered		8.68505	scattered
Midbrain	183	ICe (sagittal - na)	17.5132	na	na	3.76483	na	na	1.10069	not expressed	yes	3.80186	na		9.60492	scattered		12.5324	na	na	14.4754	na	na	11.4029	na	na	1.80918	na	na	16.168	scattered	yes	3.57817	na	na	1.53731	not expressed	yes	0.369687	not expressed	yes	11.5964	enriched		14.0351	scattered		14.0833	scattered
Midbrain	184	NB	20.453	widespread	no	3.3256	not expressed	yes	3.12811	not expressed	yes	10.8211	scattered		15.5222	scattered		13.1492	scattered	yes	16.8434	scattered	yes	14.3932	scattered	no	1.0192	not expressed	no	19.938	scattered	yes	1.02629	not expressed	yes	1.49846	not expressed	yes	0.304851	not expressed	yes	3.82151	restricted, sparse		16.0652	scattered		13.3009	scattered
Midbrain	185	SAG	18.9661	widespread	yes*	2.21559	not expressed	no	1.49712	not expressed	yes	3.0976	not expressed		7.56024	not expressed		8.88971	scattered	yes	13.0906	scattered	yes	9.27635	scattered	no	0.691576	not expressed	yes	7.8441	scattered	no	0.589771	not expressed	yes	2.24193	not expressed	yes	0.200702	not expressed	yes	5.26301			13.8377	scattered		8.27757	scattered
Midbrain	186	PBG	19.713	widespread	yes*	2.60525	not expressed	no	1.57556	not expressed	yes	3.71142	not expressed		9.94306	not expressed		7.03532	scattered	yes	11.2417	scattered	yes	9.2777	scattered	no	0.797824	not expressed	yes	13.2204	scattered	no	1.3563	not expressed	yes	3.13789	restricted	yes	0.377653	not expressed	no	5.47905			10.2896	scattered		7.97539	scattered
Midbrain	187	MEV	21.0477	widespread	no	5.69242	sparse	no*	0.74309	not expressed	yes	4.57031	scattered		20.2245	scattered		14.5848	scattered	yes	16.6643	scattered	yes	16.573	scattered	no	2.08682	not expressed	no	8.58476	scattered	yes	3.02311	not expressed	yes	1.99029	not expressed	yes	0.346162	not expressed	yes	7.31746			14.8709	scattered		13.741	scattered
Midbrain	188	SNr	16.7388	widespread	no	2.71342	not expressed	yes	1.87123	not expressed	yes	2.76406	not expressed		12.7143	scattered		7.24072	scattered	yes	9.16024	scattered	yes	8.70619	scattered	no	0.637465	not expressed	yes	4.79947	not expressed	yes	1.05222	not expressed	yes	1.03021	not expressed	yes	0.216762	not expressed	yes	6.85081	scattered		8.79943	sparse		9.998	scattered
Midbrain	189	VTA	16.9572	widespread	yes*	3.3254	not expressed	no	1.30311	not expressed	yes	4.9759	sparse		15.4761	scattered		11.3537	scattered	yes	13.8176	scattered	yes	10.478	scattered	no	1.37886	restricted, sparse	yes*	6.96948	restricted, sparse	yes*	1.11343	not expressed	yes	1.25202	not expressed	yes	0.28067	not expressed	yes	6.37714	enriched		15.6937	scattered		12.0747	scattered
Midbrain	190	RR	18.1388	widespread	no	3.45357	not expressed	yes	1.03775	not expressed	yes	2.5483	sparse		10.0983	scattered		7.82799	scattered	yes	11.5436	scattered	yes	9.53008	scattered	no	0.575305	not expressed	no	4.72086	scattered	yes	0.581002	not expressed	yes	1.41908	sparse	yes	0.185449	sparse	yes	3.85746			14.1118	scattered		12.4649	scattered
Midbrain	191	MRN	16.4	widespread	no	3.45625	sparse	no*	1.4378	not expressed	yes	3.16773	scattered		12.9106	scattered		8.4778	scattered	yes	12.7218	scattered	yes	12.8328	scattered	no	0.775144	sparse	yes	8.51151	sparse	yes	0.604597	not expressed	yes	1.23093	not expressed	yes	0.193114	not expressed	yes	5.75865			14.5616	scattered		13.1287	scattered
Midbrain	192	SCm	17.4422	widespread	no	5.00433	sparse	no*	2.02188	not expressed	yes	3.94848	sparse		17.7096	sparse		12.6269	scattered	yes	16.1626	scattered	yes	20.2294	widespread	yes*	1.69505	sparse	yes	10.6453	scattered	yes	1.47509	not expressed	yes	1.5972	not expressed	yes	0.388664	not expressed	yes	5.17387			15.7901	scattered		17.2207	scattered
Midbrain	193	PAG	17.1284	widespread	no	4.20439	sparse	no*	1.71795	not expressed	yes	5.80099	scattered		20.4112	scattered		11.5405	scattered	yes	15.6662	scattered	yes	15.7928	scattered	yes*	1.45114	sparse	yes	7.939	scattered	yes	1.34263	not expressed	yes	1.6717	not expressed	yes	0.327097	not expressed	yes	6.4041	enriched		15.2117	scattered		12.0628	scattered
Midbrain	194	APN	19.5557	widespread	no	4.20003	sparse	no*	1.57686	not expressed	yes	4.81419	restricted, sparse		12.9103	sparse		10.5654	scattered	yes	14.0907	scattered	yes	19.5375	widespread	no	1.1618	not expressed	no*	19.7507	sparse	yes	1.34281	not expressed	yes	0.827847	not expressed	yes	0.171769	not expressed	yes	6.33954			14.574	scattered		12.2421	scattered
Midbrain	195	MPT	16.5863	widespread	no	3.32099	sparse	no*	2.69074	not expressed	yes	9.38709	enriched		23.1097	scattered		11.6734	scattered	yes	16.9168	scattered	yes	25.1286	widespread	no	1.34026	not expressed	yes	13.4902	scattered	no	0.771235	not expressed	yes	3.46244	not expressed	yes	0.51222	not expressed	yes	5.59406			19.4061	scattered		7.38861	scattered
Midbrain	196	NOT	20.2725	widespread	no	4.71785	sparse	no*	2.48382	not expressed	yes	3.6689	sparse		23.2349	scattered		13.0493	scattered	yes	14.8588	scattered	yes	17.9166	widespread	no	1.454	not expressed	yes	14.4186	sparse	no*	1.72766	not expressed	yes	1.35539	not expressed	yes	0.280885	not expressed	yes	4.37397			15.8528	scattered		14.2488	scattered
Midbrain	197	NPC	17.346	widespread	no	4.02927	sparse	no*	1.85564	not expressed	yes	5.96711	sparse		12.5477	sparse		11.2777	scattered	yes	14.3364	scattered	yes	20.2924	widespread	no	1.13823	not expressed	yes	13.7202	scattered	no	0.766447	not expressed	yes	1.63821	not expressed	yes	0.231635	not expressed	yes	10.0299			14.7412	scattered		14.9092	scattered
Midbrain	198	OP	17.284	widespread	no	3.30221	sparse	no*	2.70496	not expressed	yes	5.31375	restricted, sparse		25.6437	sparse		13.2262	scattered	yes	15.7865	scattered	yes	23.5541	widespread	no	1.51821	not expressed	no	18.0725	enriched	yes	1.05238	not expressed	yes	2.83992	not expressed	yes	0.564584	not expressed	yes	6.11682			19.2991	scattered		10.4666	scattered
Midbrain	199	PPT	17.2626	widespread	no	3.84693	sparse	no*	2.1388	not expressed	yes	4.25848	sparse		23.3119	scattered		10.8641	scattered	yes	14.7508	scattered	yes	21.3329	widespread	no	1.13679	not expressed	no	8.9713	scattered	yes*	0.842529	not expressed	yes	1.95738	not expressed	yes	0.328863	not expressed	yes	4.83957			18.0674	scattered		11.414	scattered
Midbrain	200	CUN	18.1528	widespread	no	4.09851	not expressed	yes	0.947232	not expressed	yes	3.70773	scattered		12.9934	scattered		11.1969	scattered	yes	14.1489	scattered	yes	10.1737	scattered	no	0.869296	not expressed	no	8.26332	scattered	yes	4.25133	not expressed	yes	1.24695	not expressed	yes	0.203306	not expressed	yes	6.58419			9.79961	scattered		10.9086	scattered
Midbrain	201	RN	15.4009	widespread	no	2.5376	not expressed	yes	1.54838	not expressed	yes	1.82874	sparse		7.68924	scattered		8.03329	scattered	yes	11.7673	scattered	yes	11.3229	scattered	no	0.614637	not expressed	yes	3.62604	sparse	no*	0.369691	not expressed	yes	1.13104	not expressed	yes	0.208523	not expressed	yes	6.54719			13.7935	scattered		14.6439	enriched
Midbrain	202	III	19.2341	widespread	no		not expressed	yes	2.64893	not expressed	yes	5.85741	sparse		24.7435	scattered		6.9005	scattered	yes	13.2016	scattered	yes	15.1958	scattered	yes	1.16424	restricted, sparse	yes	6.69215	enriched	yes	0.527588	not expressed	yes	2.83723	restricted	yes	0.509975	not expressed	no	9.96666			19.3683	scattered		21.302	enriched
Midbrain	203	EW	19.9561	widespread	no				3.45475	not expressed	yes	4.77982	scattered		20.7235	scattered		9.30396	scattered	yes	13.2035	scattered	yes	17.8139	enriched	yes	1.03904	not expressed	no	5.44059	enriched	yes	1.13693	not expressed	yes	1.90191	sparse	yes*	0.500564	not expressed	no	8.15955	enriched		26.1307	enriched		22.327	enriched
Midbrain	204	IV	19.0678	widespread	no		not expressed	yes	2.23086	not expressed	yes	2.77181	sparse		23.3274	scattered		6.87382	scattered	yes	15.7611	scattered	yes	10.3011	enriched	yes	1.37358	not expressed	no	6.29768	scattered	yes	0.39964	not expressed	yes	5.88229	restricted, sparse	yes	0.212421	not expressed	no	6.96625	restricted, sparse		20.2222	scattered		12.1819	scattered
Midbrain	205	VTN	19.666	widespread	no		not expressed	yes	1.27815	not expressed	yes	2.15993	not expressed		10.8271	scattered		8.52546	scattered	yes	15.5383	scattered	yes	5.16957	sparse	no*	1.31224	not expressed	no	1.34811	scattered	yes	0.61545	not expressed	yes	1.90139	not expressed	yes	0.155753	not expressed	yes	12.3287			19.5029	scattered		8.03173	scattered
Midbrain	206	AT (sagittal - na)	19.3305	na	na	3.64565	na	na	1.81817	not expressed	yes	2.99356	na		17.1771	scattered		5.99827	na	na	16.6137	na	na	8.03621	na	na	1.87769	na	na	4.77437	scattered	yes	0.460965	na	na	2.93366	not expressed	yes	0.220765	not expressed	yes	6.67087	restricted		25.7052	scattered		10.8337	scattered
Midbrain	207	LT (sagittal - na)		na	na		na	na		not expressed	yes		na		16.6212	scattered			na	na		na	na		na	na		na	na		scattered	yes		na	na		not expressed	yes		not expressed	yes	4.20749			8.14996	scattered		12.6152	scattered
Midbrain	208	SNc	18.2094	widespread	yes*	3.33624	not expressed	no	1.60005	not expressed	yes	2.83679	sparse		14.8942	scattered		8.82403	scattered	yes	11.6902	scattered	yes	10.1431	scattered	no	0.989191	not expressed	no*	4.31787	sparse	yes	0.856224	not expressed	yes	0.988754	not expressed	yes	0.191187	not expressed	yes	5.96001	enriched		13.6987	enriched		11.7167	scattered
Midbrain	209	PPN	18.3803	widespread	no	4.19078	not expressed	yes	0.955881	not expressed	yes	3.1666	sparse		10.6892	scattered		9.17506	scattered	yes	13.6099	scattered	yes	10.559	sparse	no*	0.650178	not expressed	no	3.53763	enriched	yes*	0.822739	not expressed	yes	1.89886	restricted, sparse	yes	0.247815	sparse	yes	5.67152			14.7003	scattered		8.58639	scattered
Midbrain	210	IF	20.8549	widespread	no				1.24385	not expressed	yes	10.4235	sparse		13.8438	scattered		16.8829	scattered	yes	17.134	scattered	yes	11.1606	sparse	no*	1.13003	not expressed	no	11.6863	scattered	yes	1.00956	not expressed	yes	1.50668	not expressed	yes	0.282076	not expressed	yes	6.56968			15.4924	scattered		9.01965	sparse
Midbrain	211	IPN	21.2166	widespread	no	3.93559	not expressed	yes	1.85629	not expressed	yes	5.39124	sparse		18.5841	scattered		12.049	scattered	yes	17.5696	scattered	yes	15.5491	sparse	no*	1.54058	not expressed	yes	8.61822	not expressed	yes	1.37168	not expressed	yes	1.95958	not expressed	yes	0.362234	not expressed	yes	9.24847	enriched		17.0497	scattered		5.54317	sparse
Midbrain	212	RL	15.8715	widespread	yes*				1.70659	not expressed	yes	3.82712	sparse		20.4052	scattered		10.6246	scattered	yes	13.5309	scattered	yes	11.6392	sparse	no*	1.00957	not expressed	no	8.57675	enriched	yes	0.947512	not expressed	yes	1.97003	not expressed	yes	0.397153	not expressed	yes	10.7	enriched		13.4146	scattered		14.6482	scattered
Midbrain	213	CLI	16.7524	widespread	no				1.15912	not expressed	yes	4.0771	sparse		10.413	scattered		10.3909	scattered	yes	14.2553	scattered	yes	7.17445	sparse	no*	0.955853	not expressed	no	9.09107	enriched	yes	0.708438	not expressed	yes	2.95891	not expressed	yes	0.241666	not expressed	yes	8.97613			9.91	scattered		9.83417	scattered
Midbrain	214	DR	21.1352	widespread	no		not expressed	yes	1.43182	not expressed	yes	5.75775	sparse		17.6268	enriched		10.1346	scattered	yes	14.4216	scattered	yes	10.6891	scattered	no	1.38898	not expressed	no	8.17958	enriched	yes	1.62432	not expressed	yes	3.70104	not expressed	yes	0.395159	not expressed	yes	9.10386	enriched		16.1417	scattered		10.6205	scattered
Pons	214.5	AVERAGE	18.4053	widespread	no	3.57743	sparse	yes	0.983013	not expressed	yes	4.04564	enriched		15.6502	enriched		7.81063	enriched	yes	12.228	enriched	yes	11.6375	scattered	no	0.915224	not expressed	no	5.04503	enriched	yes	1.91104	not expressed	yes	2.37213	restricted	yes*	0.342253	not expressed	no	6.9038	enriched		14.8073	enriched		10.6118	enriched
Pons	215	NLL	17.6045	widespread	yes*	2.92474	sparse	yes	0.809095	not expressed	yes	4.1001	sparse		8.54762	sparse		6.7763	scattered	yes	11.6469	scattered	yes	10.9944	scattered	no	0.588359	not expressed	yes	4.24694	sparse	no*	4.89069	not expressed	yes	1.99183	not expressed	yes	0.259868	not expressed	yes	5.0411			8.87606	scattered		7.69218	scattered
Pons	216	PSV	16.0535	widespread	no	2.45077	scattered	no	0.726426	not expressed	yes	1.77286	sparse		13.4625	enriched		3.56542	scattered	yes	11.4445	scattered	yes	12.8487	scattered	no	0.35945	not expressed	yes	5.68445	scattered	no	0.292805	not expressed	yes	1.33557	not expressed	yes	0.111	not expressed	yes	9.64225	enriched		6.02981	scattered		12.4338	scattered
Pons	217	PB	19.6035	widespread	yes*	4.44473	sparse	yes	0.653467	not expressed	yes	7.6258	enriched		18.8838	enriched		11.2165	enriched	yes	16.7497	enriched	yes	16.4764	enriched	yes*	1.14061	not expressed	no	8.39148	enriched	yes	5.30481	not expressed	yes	2.10446	restricted, sparse	no	0.363388	not expressed	yes	6.70869	enriched		9.53381	scattered		8.87821	scattered
Pons	218	SOC	12.6576	widespread	yes*	2.14408	not expressed	no*	0.587049	not expressed	yes	1.2236	not expressed		5.81986	sparse		5.03679	scattered	yes	7.82244	scattered	yes	10.2823	scattered	no	0.322975	not expressed	no	3.73484	enriched	yes	0.411341	not expressed	yes	1.75023	not expressed	yes	0.0936501	not expressed	yes	6.54023	scattered		7.04485	scattered		11.0594	scattered
Pons	219	B (sagittal - na)	22.298	na	na	4.21281	na	na	0.632179	not expressed	yes	5.80816	na		18.6308	scattered		13.0047	na	na	16.2456	na	na	12.405	na	na	1.34277	na	na	3.99621	not expressed	yes	5.45503	na	na	3.03957	restricted, sparse	yes	0.661621	not expressed	no	8.00185			17.7937	scattered		9.29481	scattered
Pons	220	DTN	19.0787	widespread	no				0.576506	not expressed	yes	5.40544	scattered		15.0197	not expressed		8.59002	scattered	yes	10.2195	scattered	yes	8.05907	scattered	no	1.40972	not expressed	yes	3.69883	not expressed	yes	3.99173	not expressed	yes	2.16845	not expressed	yes	0.563	not expressed	yes	6.91601			19.1396	scattered		5.62048	scattered
Pons	221	PCG	18.936	widespread	no	3.92267	not expressed	yes	1.3223	not expressed	yes	5.02155	scattered		17.0379	enriched		8.72177	scattered	yes	12.794	scattered	yes	10.5347	scattered	no	1.51666	not expressed	yes	4.66721	not expressed	no	4.4274	not expressed	yes	2.60115	restricted, sparse	no	0.546456	sparse	no*	7.65472			19.1143	scattered		9.01918	sparse
Pons	222	PG	14.4912	widespread	no	2.27308	not expressed	yes	0.691969	not expressed	yes	3.78658	sparse		27.171	enriched		7.09596	enriched	yes	11.0888	enriched	yes	6.86137	sparse	no*	0.780562	not expressed	yes	9.30824	restricted	no	0.318615	not expressed	yes	3.15917	restricted	no	0.183681	not expressed	yes	11.2812	enriched		15.0642	enriched		15.6886	enriched
Pons	223	PRNc	16.3925	widespread	no	2.7262	sparse	no*	0.918111	not expressed	yes	1.80601	sparse		9.11693	scattered		5.00343	scattered	yes	9.60252	scattered	yes	11.4056	scattered	no	0.533795	not expressed	no*	3.51112	scattered	yes	0.330005	not expressed	yes	1.76902	not expressed	yes	0.160686	not expressed	yes	4.97226			14.4887	scattered		12.772	scattered
Pons	224	SG (sagittal - na)	20.4775	na	na		na	na	1.91491	not expressed	yes	4.18998	na		21.745	scattered		6.27768	na	na		na	na	9.93796	na	na	1.15731	na	na	6.69595	restricted, sparse	yes	1.73654	na	na	1.11314	not expressed	yes	0.559003	not expressed	yes	5.7311			24.6549	scattered		6.927	scattered
Pons	225	SUT	19.6781	widespread	no	5.05509	not expressed	yes	0.8376	not expressed	yes	6.95161	scattered		18.9671	scattered		6.8616	scattered	yes	14.617	scattered	yes	16.4805	scattered	no	0.870927	not expressed	no*	6.98748	scattered	yes	1.61777	not expressed	yes	2.1603	not expressed	yes	0.261955	not expressed	yes	5.17925			10.9587	scattered		12.5915	scattered
Pons	226	TRN	17.3668	widespread	no	2.29491	not expressed	yes	0.659932	not expressed	yes	2.72772	sparse		20.3324	enriched		5.68711	scattered	yes	8.96317	enriched	yes	9.1956	scattered	yes*	0.770136	not expressed	no	4.30061	scattered	yes	0.232474	not expressed	yes	2.26722	restricted	no	0.287223	not expressed	yes	7.96868			11.9767	scattered		12.9668	enriched
Pons	227	V	18.4988	widespread	no	3.94771	sparse	no*	0.791975	not expressed	yes	2.87691	sparse		11.2953	sparse		5.33225	scattered	yes	11.8259	scattered	yes	16.7827	scattered	no	0.467378	not expressed	yes	5.4494	scattered	no	0.538076	not expressed	yes	4.16999	restricted	yes	0.143421	not expressed	no	5.88512			14.9392	enriched		16.079	enriched
Pons	228	CS	18.9598	widespread	no	2.16635			1.05064	not expressed	yes	2.96241	sparse		13.4781	enriched		9.21575	scattered	yes	11.839	scattered	yes	8.10399	sparse	no*	1.12725	not expressed	no	5.75633	enriched	yes	0.376672	not expressed	yes	1.58508	not expressed	yes	0.200159	not expressed	yes	4.55751			13.1711	scattered		5.95662	scattered
Pons	229	LC	23.1224	widespread	no	5.03275	not expressed	yes	0.967457	not expressed	yes	7.27331	enriched		19.9027	enriched		12.9065	enriched	yes	15.0061	scattered	yes	18.8668	scattered	no	1.50093	not expressed	yes	6.43041	not expressed	yes	1.9214	not expressed	yes	2.45098	restricted, sparse	no	0.541142	not expressed	yes	7.49263			14.5834	enriched		13.0894	scattered
Pons	230	LDT	20.2343	widespread	no	4.07808	not expressed	yes	0.479797	not expressed	yes	4.65411	sparse		15.5585	scattered		11.0936	scattered	yes	15.124	scattered	yes	11.3417	scattered	no	1.22372	not expressed	yes	4.47931	not expressed	yes	3.45711	not expressed	yes	3.26047	restricted, sparse	yes	0.586628	not expressed	no	7.41529			14.8323	scattered		8.03844	scattered
Pons	231	NI (sagittal - na)	17.8379	na	na	3.73327	na	na	2.00616	not expressed	yes	4.89797	na		17.7728	scattered		8.57435	na	na	11.3069	na	na	7.98398	na	na	0.943783	na	na	4.61182	not expressed	yes	1.85385	na	na	2.09769	not expressed	yes	0.423973	not expressed	yes	8.1138	enriched		24.2524	scattered		12.3312	scattered
Pons	232	PRNr	17.2832	widespread	no	2.5757	sparse	no*	0.761022	not expressed	yes	1.9101	scattered		9.47751	scattered		5.53712	scattered	yes	9.95092	scattered	yes	10.8279	scattered	yes	0.632547	not expressed	yes	3.4697	sparse	no*	0.350229	not expressed	yes	1.47172	not expressed	yes	0.152061	not expressed	yes	4.577			12.6014	scattered		12.1694	scattered
Pons	233	RPO (sagittal - na)	16.2855	na	na		na	na	2.09238	not expressed	yes	2.03508	na		11.0164	scattered		6.02246	na	na	7.16476	na	na	7.69721	na	na	0.366669	na	na	2.83552	not expressed	yes	0.360366	na	na	1.06028	not expressed	yes	0.259967	not expressed	yes	5.16687	restricted, sparse		13.3387	scattered		6.82453	scattered
Pons	234	SLC (sagittal - na)	18.2356	na	na	5.09474	na	na	1.37354	not expressed	yes	4.35982	na		16.1548	scattered		7.11309	na	na	12.6738	na	na	14.585	na	na	0.639513	na	na	4.01537	not expressed	yes	0.646862	na	na	3.76676	restricted, sparse	no	0.292905	not expressed	yes	6.35006			17.0631	scattered		11.2402	scattered
Pons	235	SLD (sagittal - na)	21.4159	na	na	5.31598	na	na	0.790751	not expressed	yes	3.56941	na		19.2626	scattered		10.3908	na	na	18.4744	na	na	12.7159	na	na	1.52465	na	na	3.67433	not expressed	yes	1.61804	na	na	4.49168	restricted, sparse	yes	0.535518	not expressed	no	9.78422			21.497	scattered		12.1757	scattered
Medulla	235.5	AVERAGE	16.4659	widespread	no	3.44337	sparse	no	1.18008	restricted, sparse	no	3.45886	enriched		10.2636	enriched		6.4294	enriched	yes	11.9778	enriched	yes	12.3788	scattered	no	1.1484	not expressed	no*	9.04732	scattered	no	1.16245	not expressed	yes	2.49134	restricted	yes*	0.417967	restricted, sparse	no	7.50551	enriched		11.0729	enriched		14.0763	enriched
Medulla	236	AP	21.8412	widespread	yes*		not expressed	no		not expressed	yes	8.94203	enriched		13.7603	scattered		10.0925	enriched	yes	15.6414	enriched	yes	20.1521	scattered	no	4.02853	not expressed	no	24.3481	scattered	yes	5.32367	not expressed	yes	4.06316	not expressed	yes	2.20837	not expressed	yes	11.0373				scattered		5.70698	not expressed
Medulla	237	DCO	15.4053	widespread	yes*	3.35817	not expressed	no	1.52332	not expressed	yes	6.26339	sparse		14.5589	enriched		5.26077	scattered	yes	13.2222	scattered	yes	14.9815	scattered	no	0.780693	not expressed	yes	8.30784	scattered	no	0.598511	not expressed	yes	0.540001	not expressed	yes	0.793057	not expressed	yes	7.04561			10.5839	scattered		7.77507	scattered
Medulla	238	VCO	15.0467	widespread	yes*	1.93185	not expressed	no	2.00611	restricted, sparse	no	2.7466	sparse		8.80992	sparse		5.1992	scattered	yes	12.7973	scattered	yes	14.3095	scattered	no	0.312654	not expressed	yes	10.483	scattered	no	0.34318	sparse	yes	0.522219	not expressed	yes	0.302307	not expressed	yes	8.45313			4.90536	scattered		7.11742	scattered
Medulla	239	CU	21.5788	widespread	yes*	6.406	not expressed	no	0.293551	not expressed	yes	6.24766	sparse		11.8838	scattered		10.8105	scattered	yes	18.3373	scattered	yes	18.8316	scattered	yes	2.41074	not expressed	no	17.6358	scattered	yes	2.18566	not expressed	yes	2.37931	restricted	no	0.636234	not expressed	yes	7.6063				scattered		9.9292	scattered
Medulla	240	GR	20.0136	widespread	yes*	6.77843	not expressed	no*		not expressed	yes	8.00677	sparse		14.5562	scattered		9.55648	enriched	yes	14.5124	enriched	yes	21.089	scattered	no	2.54108	not expressed	yes	16.5226	scattered	no	1.00047	not expressed	yes	3.22891	restricted	no	0.658131	not expressed	yes	8.81867				scattered		9.58416	scattered
Medulla	241	ECU	20.7524	widespread	yes*	4.82298	not expressed	no*	0.663059	not expressed	yes	4.80608	not expressed		12.8128	scattered		6.41423	scattered	yes	15.7108	scattered	yes	17.9415	scattered	no	1.32977	not expressed	no*	16.8451	scattered	yes	4.13906	not expressed	yes	1.84769	not expressed	yes	0.825828	not expressed	yes	8.59182			21.4144	scattered		13.733	scattered
Medulla	242	NTB (sagittal - na)	7.08523	na	na	1.24588	na	na	0.675869	not expressed	yes	0.738131	na		12.6644	scattered		1.92979	na	na	4.60165	na	na	7.40013	na	na	0.233431	na	na	5.84276	sparse	yes	0.184329	na	na	2.97428	not expressed	yes	0.0837264	not expressed	yes	6.43451			4.84079	scattered		14.3567	scattered
Medulla	243	NTS	22.5276	widespread	yes*	5.90023	not expressed	no	0.557058	not expressed	yes	8.19813	enriched		11.4134	scattered		11.6695	enriched	yes	15.9646	enriched	yes	16.2105	scattered	yes*	2.84544	not expressed	no*	14.4385	scattered	yes	2.33938	not expressed	yes	2.94202	restricted	yes	0.654358	restricted, sparse	yes*	8.87905	enriched		17.4654	enriched		11.5307	restricted, sparse
Medulla	244	SPVC	16.3304	widespread	yes*	2.80133	sparse	yes		not expressed	yes	3.59857	restricted, sparse		11.4144	restricted, sparse		6.93806	enriched	yes	16.8179	enriched	yes	14.2811	scattered	yes	1.5134	sparse	yes*	17.4186	scattered	yes*	0.646226	not expressed	yes	1.53142	not expressed	yes	0.263433	not expressed	yes	8.82012	enriched			scattered		17.4639	scattered
Medulla	245	SPVI	17.2751	widespread	yes*	2.42272	not expressed	no	0.50856	not expressed	yes	3.01692	sparse		9.2333	scattered		4.57337	scattered	yes	14.941	scattered	yes	12.667	scattered	no	1.23812	sparse	yes	11.9946	scattered	yes	0.562435	not expressed	yes	1.30933	not expressed	yes	0.315369	not expressed	yes	15.684	enriched		6.21519	scattered		17.3076	scattered
Medulla	246	SPVO	15.4156	widespread	no	2.96782	not expressed	yes	1.34278	not expressed	yes	2.24129	sparse		9.32829	sparse		3.66196	scattered	yes	12.0853	scattered	yes	13.1921	scattered	no	0.551836	not expressed	no*	5.54328	scattered	yes	0.262332	not expressed	yes	1.1218	not expressed	yes	0.2531	not expressed	yes	6.83782			9.24149	scattered		13.9253	scattered
Medulla	247	VI	15.176	widespread	no		not expressed	yes	2.75277	not expressed	yes	1.7528	sparse		16.7075	scattered			scattered	yes		scattered	yes		scattered	no		not expressed	yes	5.14633	sparse	no*	0.284966	not expressed	yes	1.23617	restricted	yes	0.256701	not expressed	no	6.4937			20.4121	scattered		8.95531	scattered
Medulla	248	VII	13.0786	widespread	no	2.24208	not expressed	yes	1.08234	not expressed	yes	1.01286	not expressed		3.68721	not expressed		4.29111	scattered	yes	8.62933	scattered	yes	10.0352	scattered	no	0.46973	not expressed	no*	3.94526	scattered	yes	0.26539	not expressed	yes	4.97863	restricted	yes	0.189955	not expressed	no	8.37631			9.00153	scattered		14.4079	scattered
Medulla	249	ACVII		widespread	no		not expressed	yes	1.08927	not expressed	yes		not expressed		7.31865	scattered									scattered	no		not expressed	yes	2.99698	scattered	no		not expressed	yes	2.45962	not expressed	yes	0.132318	not expressed	yes	4.24892			12.305	scattered		11.9596	scattered
Medulla	250	AMB	17.0345	widespread	yes*	2.79256	not expressed	no	0.577483	not expressed	yes	2.33755	sparse		7.99186	scattered		7.75163	scattered	yes	12.8947	scattered	yes	13.2705	scattered	yes*	0.591779	not expressed	no*	5.99172	scattered	yes	0.455684	not expressed	yes	4.42848	restricted	yes	0.344484	not expressed	no	9.46971			0.827455	enriched		16.5816	scattered
Medulla	251	DMX	22.0345	widespread	no	5.99257	not expressed	yes	0.513986	not expressed	yes	7.99795	sparse		10.3042	scattered		11.567	enriched	yes	15.1111	enriched	yes	17.8831	scattered	yes*	3.82128	not expressed	yes	13.351	scattered	no	3.0103	not expressed	yes	7.7304	restricted	no	0.553175	not expressed	yes	7.54948	enriched			enriched		18.5506	enriched
Medulla	252	GRN	17.9563	widespread	yes*	2.80681	not expressed	no	0.938697	not expressed	yes	1.62325	sparse		6.22215	scattered		4.56627	scattered	yes	10.4592	scattered	yes	10.4927	scattered	no	0.616213	not expressed	yes	3.46486	scattered	no	0.359718	not expressed	yes	1.61766	not expressed	yes	0.290429	not expressed	yes	7.72955			9.97622	scattered		13.5783	scattered
Medulla	253	ICB (sagittal - na)		na	na		na	na		not expressed	yes		na			widespread			na	na		na	na		na	na		na	na		sparse	yes		na	na		not expressed	yes		not expressed	yes					scattered			scattered
Medulla	254	IO	2.74808	widespread	yes*	0.0817839	not expressed	no	0.155379	not expressed	yes	1.56276	restricted, sparse		10.6882	enriched		3.41622	restricted, sparse	yes*	0.785674	scattered	yes	1.07088	not expressed	no	0.455866	not expressed	yes	4.90094	scattered	no	0.60359	not expressed	yes	1.45314	sparse	no*	0.209711	not expressed	yes	2.33833			0.00345743	scattered		18.1602	scattered
Medulla	255	IRN	18.4546	widespread	yes*	3.44569	not expressed	no*	1.00052	not expressed	yes	2.42875	scattered		8.84602	scattered		7.04968	scattered	yes	12.4315	scattered	yes	12.7933	scattered	no	0.856327	not expressed	no*	7.2577	scattered	yes	0.740356	not expressed	yes	2.60778	sparse	no*	0.314319	not expressed	yes	8.15233			12.7445	scattered		14.7122	scattered
Medulla	256	ISN (sagittal - na)	18.1561	na	na	4.65185	na	na	1.11239	not expressed	yes	4.39084	na		10.2905	sparse		7.2335	na	na	14.8035	na	na	14.6965	na	na	0.49475	na	na	3.82605	scattered	yes*	0.662593	na	na	5.00157	restricted	yes	0.191964	not expressed	no	6.82768			15.0006	scattered		16.0815	scattered
Medulla	257	LIN (sagittal - na)	20.2507	na	na	4.20822	na	na	0.314869	not expressed	yes	2.24852	na		10.7695	scattered		8.04104	na	na	13.3124	na	na	12.6643	na	na	0.936894	na	na	7.61913	scattered	yes	0.730322	na	na	1.76335	not expressed	yes	0.549879	not expressed	yes	7.41191			5.3749	scattered		18.9203	scattered
Medulla	258	LRN	9.37565	widespread	yes*	1.15581	not expressed	no*	0.162572	not expressed	yes	1.50934	sparse		12.2241	enriched		6.6935	scattered	yes	8.12078	scattered	yes	9.65756	scattered	no	0.799666	not expressed	no*	10.7488	scattered	yes	0.304595	not expressed	yes	2.23619	not expressed	yes	0.300685	not expressed	yes	8.62119	enriched			scattered		20.8252	enriched
Medulla	259	MARN	13.373	widespread	no	1.14132	not expressed	yes	0.686561	not expressed	yes	3.14759	sparse		7.01964	sparse		4.79116	scattered	yes	9.21432	scattered	yes	6.06377	scattered	no	0.826599	not expressed	yes	3.97789	scattered	no	0.319186	not expressed	yes	1.90551	not expressed	yes	0.239931	not expressed	yes	8.346			8.26792	scattered		15.3029	scattered
Medulla	260	MDRNd	20.4696	widespread	yes*	4.68632	not expressed	no*		not expressed	yes	3.65235	sparse		12.4711	scattered		11.0125	scattered	yes	14.8261	scattered	yes	16.386	scattered	no	1.32712	not expressed	no*	13.6252	scattered	yes	0.979148	not expressed	yes	2.62262	not expressed	yes	0.309731	not expressed	yes	7.64411				scattered		16.0214	scattered
Medulla	261	MDRNv (sagittal - na)	16.1896	na	na	2.52404	na	na		not expressed	yes	2.14097	na		8.28352	scattered		5.99674	na	na	7.94131	na	na	11.41	na	na	0.871756	na	na	5.79836	scattered	yes	0.5034	na	na	4.26092	not expressed	yes	0.211834	not expressed	yes	6.82778				scattered		17.0239	scattered
Medulla	262	PARN	19.1986	widespread	yes*	4.25786	sparse	yes	1.16236	not expressed	yes	3.66376	sparse		12.1483	enriched		7.33579	scattered	yes	13.7888	scattered	yes	14.0019	scattered	no	0.776658	not expressed	yes	7.59581	scattered	no	0.75313	not expressed	yes	2.28102	sparse	no*	0.28361	not expressed	yes	8.60907			13.7486	scattered		15.0149	scattered
Medulla	263	PAS (sagittal - na)	22.5615	na	na	6.79865	na	na		not expressed	yes	5.84282	na		11.3348	scattered		12.3112	na	na	18.1175	na	na	18.0061	na	na	2.23994	na	na	15.832	scattered	yes	2.47577	na	na	2.23092	not expressed	yes	0.486761	not expressed	yes	8.72154				scattered		7.70901	scattered
Medulla	264	PGRNd (sagittal - na)	16.3048	na	na	2.77061	na	na	3.03611	not expressed	yes	1.43722	na		4.85328	sparse		3.59533	na	na	8.53049	na	na	9.23849	na	na	0.546352	na	na	6.31886	scattered	yes	0.29682	na	na	1.71993	restricted	no	0.229683	not expressed	yes	7.76742			12.4138	scattered		10.7124	scattered
Medulla	265	PGRNl	11.5737	widespread	yes*	1.52333	not expressed	no	0.572176	not expressed	yes	2.43018	sparse		6.99418	sparse		5.43806	scattered	yes	9.68855	scattered	yes	7.5797	scattered	yes	0.578961	not expressed	no	4.80346	scattered	yes*	0.368995	not expressed	yes	4.90858	restricted	yes	0.297028	not expressed	no	9.84737			2.57419	scattered		15.8249	scattered
Medulla	266	NR (sagittal - na)	20.6291	na	na		na	na	2.91575	not expressed	yes	1.61939	na		9.48445	sparse		5.56507	na	na	7.32096	na	na	9.65358	na	na	0.691397	na	na	12.1532	scattered	yes	1.95219	na	na	2.23888	not expressed	yes	0.576754	not expressed	yes	10.9142			6.18526	scattered		16.1211	scattered
Medulla	267	PRP	21.3004	widespread	no	3.63721	not expressed	yes	3.34342	not expressed	yes	3.36261	sparse		10.065	sparse		6.34926	scattered	yes	10.245	scattered	yes	12.3094	scattered	no	2.05776	not expressed	no*	13.5217	scattered	yes	2.10592	not expressed	yes	1.51087	not expressed	yes	0.824219	not expressed	yes	11.5506	enriched		17.5004	enriched		13.5281	scattered
Medulla	268	PPY (sagittal - na)	2.72517	na	na	0.203786	na	na	0.69609	not expressed	yes	0.914341	na		1.7656	scattered		1.96381	na	na	3.62905	na	na	0.955451	na	na	0.0867376	na	na	4.10399	scattered	yes	0.25882	na	na	4.51193	restricted	no	0.0271709	not expressed	yes	7.55116			1.26588	scattered		12.7316	scattered
Medulla	269	LAV	17.3611	widespread	no	4.01732	not expressed	yes	2.20559	not expressed	yes	2.52807	not expressed		9.13002	scattered		5.86942	scattered	yes	11.4098	scattered	yes	14.7013	scattered	no	0.768386	not expressed	no*	7.71901	scattered	yes	1.08075	not expressed	yes	0.920615	not expressed	yes	0.363792	not expressed	yes	6.96625			15.6827	scattered		14.7916	scattered
Medulla	270	MV	20.3901	widespread	yes*	4.23176	not expressed	no	1.68545	not expressed	yes	5.00966	not expressed		14.4473	sparse		7.34236	scattered	yes	15.0949	scattered	yes	16.0679	scattered	yes*	2.13065	not expressed	no	11.8589	scattered	yes*	2.57157	not expressed	yes	1.3324	not expressed	yes	0.755621	not expressed	yes	9.49128			20.3924	scattered		13.2869	scattered
Medulla	271	SPIV	19.9535	widespread	no	4.67846	not expressed	yes	1.44071	not expressed	yes	3.88298	not expressed		9.39322	sparse		7.46153	scattered	yes	15.7728	scattered	yes	15.5907	scattered	no	1.10187	not expressed	no	12.1852	scattered	yes*	1.84212	not expressed	yes	0.946197	not expressed	yes	0.622049	not expressed	yes	7.00021			16.9478	scattered		13.6167	scattered
Medulla	272	SUV	17.0065	widespread	no	3.59924	not expressed	yes	1.90828	not expressed	yes	2.70275	sparse		11.8019	scattered		5.39437	scattered	yes	11.3679	scattered	yes	18.3062	scattered	no	0.752192	not expressed	no*	6.6861	scattered	yes	2.66595	not expressed	yes	0.906457	not expressed	yes	0.369358	not expressed	yes	4.97908			12.3413	scattered		11.6913	scattered
Medulla	273	x	19.3202	widespread	no	2.79785	not expressed	yes	1.55492	not expressed	yes	1.43431	not expressed		7.09469	sparse		3.75672	scattered	yes	12.7837	scattered	yes	12.3985	scattered	no	0.526767	not expressed	yes	6.06422	scattered	no	0.299752	not expressed	yes	0.57134	not expressed	yes	0.228368	not expressed	yes	6.73954			16.0923	scattered		12.9826	scattered
Medulla	274	XII	19.8578	widespread	no	4.19389	not expressed	yes	1.68658	not expressed	yes	3.38384	sparse		7.93139	not expressed		8.7959	scattered	yes	10.2897	scattered	yes	12.6472	scattered	yes*	1.48805	not expressed	no*	8.87836	scattered	yes	1.46408	not expressed	yes	9.97371	restricted	yes	0.32702	not expressed	no	5.97812	enriched		15.423	scattered		18.9387	enriched
Medulla	275	y (sagittal - na)		na	na		na	na	1.00183	not expressed	yes		na		7.76492	sparse			na	na		na	na		na	na		na	na	5.89022	scattered	no		na	na	0.625662	not expressed	yes	0.23103	not expressed	yes	3.68322			11.3909	scattered		11.2937	scattered
Medulla	276	RM	16.4916	widespread	no		not expressed	yes	0.587516	not expressed	yes	4.86068	sparse		14.7524	scattered		3.59587	scattered	yes		scattered	yes	7.61899	not expressed	yes	0.516465	not expressed	yes	3.71714	sparse	no*	0.27707	not expressed	yes	1.29733	not expressed	yes	0.186366	not expressed	yes	3.6892			12.7211	scattered		17.7163	scattered
Medulla	277	RPA	4.69088	widespread	yes*		not expressed	no	0.578904	not expressed	yes	3.11433	sparse		15.748	enriched		4.4967	scattered	yes		scattered	yes	2.41684	not expressed	yes	0.390458	not expressed	yes	4.3916	sparse	no*	0.697494	not expressed	yes	0.897756	not expressed	yes	0.297055	not expressed	yes	1.55553				scattered		20.7448	scattered
Medulla	278	RO	11.7003	widespread	yes*		not expressed	yes	0.149889	not expressed	yes	1.55645	sparse		13.1029	enriched		2.95843	scattered	yes		scattered	yes	3.80086	scattered	no	0.281401	not expressed	yes	6.23717	sparse	no*	0.58314	not expressed	yes	1.00042	not expressed	yes	0.359715	not expressed	yes	1.94227				scattered		14.9904	scattered
Cerebellum	278.5	AVERAGE	16.2164	widespread	yes*	2.92272	not expressed	no*	0.809753	not expressed	yes	10.9887	restricted		17.5941	widespread	no	3.87091	restricted	yes	11.5923	scattered	yes*	20.4642	widespread	no	1.01287	not expressed	no	10.0785	restricted	yes	7.57325	restricted	no	0.627221	not expressed	yes	0.764806	not expressed	yes	7.45193	restricted		12.3103	restricted		7.16083	restricted
Cerebellum	279	LING	16.2559	widespread	yes*	4.45142	not expressed	no*	1.09866	not expressed	yes	7.50333	restricted		20.9087	widespread	no	7.88601	restricted	yes	14.2782	scattered	yes*	23.2316	widespread	no	2.68381	not expressed	no	12.0849	restricted	yes	7.3348	not expressed	yes	0.441532	not expressed	yes	2.34302	not expressed	yes	7.50516	restricted		19.4411	restricted		6.83033	restricted
Cerebellum	280	CENT	14.9215	widespread	yes*	2.94168	not expressed	no*	1.1688	not expressed	yes	9.53261	restricted		17.023	widespread	no	4.42835	restricted, sparse	yes*	10.4322	scattered	yes*	17.6997	widespread	no	0.982512	not expressed	no	12.6446	restricted	yes	18.7612	restricted	no	0.647374	not expressed	yes	0.366085	not expressed	yes	6.88168	restricted		12.6902	restricted		6.88565	restricted
Cerebellum	281	CUL	15.7336	widespread	yes*	3.96007	not expressed	no*	1.18665	not expressed	yes	12.1273	restricted		17.4204	widespread	no	3.18872	restricted, sparse	yes*	11.4766	scattered	yes*	18.2356	widespread	no	0.851665	not expressed	no	12.5207	restricted	yes	21.6292	restricted	no	0.670974	not expressed	yes	0.340547	not expressed	yes	9.11706	restricted		14.2238	restricted		6.61032	restricted
Cerebellum	282	DEC	13.7688	widespread	yes*	2.69119	not expressed	no*	0.300409	not expressed	yes	13.0657	restricted		19.9176	widespread	no	2.31241	restricted, sparse	yes*	9.74149	scattered	yes*	19.4904	widespread	no	0.648021	not expressed	no	11.9271	restricted	yes	13.5134	restricted	no	0.461945	not expressed	yes	0.325825	not expressed	yes	9.05858	restricted			restricted		6.42655	restricted
Cerebellum	283	FOTU	15.9314	widespread	yes*	2.79606	not expressed	no*		not expressed	yes	17.8782	restricted		13.4751	widespread	no	2.71984	restricted	yes	11.6283	scattered	yes*	23.3941	widespread	no	0.624969	not expressed	no	9.14076	restricted	yes	10.265	restricted	no	0.733868	not expressed	yes	0.437814	not expressed	yes	8.72465	restricted			restricted		6.30752	restricted
Cerebellum	284	PYR	13.9813	widespread	yes*	2.73908	not expressed	no*	0.366926	not expressed	yes	11.2401	restricted		17.964	widespread	no	2.89452	restricted	yes	11.8419	scattered	yes*	20.0936	widespread	no	0.698316	not expressed	no	9.51563	restricted	yes	5.04042	not expressed	yes	0.763725	not expressed	yes	0.421774	not expressed	yes	7.1177	restricted			restricted		6.87452	restricted
Cerebellum	285	UVU	14.9684	widespread	yes*	3.66171	not expressed	no*	0.483505	not expressed	yes	8.96371	restricted		18.6727	widespread	no	6.11288	scattered	yes	13.4663	scattered	yes*	21.9692	widespread	no	0.99732	not expressed	no	13.3374	restricted	yes	2.26381	not expressed	yes	1.02522	not expressed	yes	1.14241	not expressed	yes	6.52153	restricted		19.2652	restricted		8.58166	restricted
Cerebellum	286	NOD	17.7057	widespread	yes*	4.2481	not expressed	no*	0.777992	not expressed	yes	7.42739	restricted		20.3606	widespread	no	8.00364	restricted	yes	16.0799	scattered	yes*	21.4622	widespread	no	2.04086	not expressed	no	14.7023	restricted	yes	3.01383	not expressed	yes	0.746535	not expressed	yes	2.75656	not expressed	yes	6.29992	restricted		26.5161	restricted		9.29675	restricted
Cerebellum	287	SIM	18.4039	widespread	yes*	2.92382	not expressed	no*	1.11489	not expressed	yes	15.4906	restricted		19.8803	widespread	no	1.90622	restricted	yes	13.4181	scattered	yes*	20.9484	widespread	no	0.814772	not expressed	no	13.0217	restricted	yes	20.5452	restricted	no	0.689804	not expressed	yes	0.418996	not expressed	yes	9.54783	restricted		12.8471	restricted		7.28075	restricted
Cerebellum	288	AN	18.9698	widespread	yes*	2.23969	not expressed	no*	0.738522	not expressed	yes	18.7159	restricted		20.8509	widespread	no	2.23273	restricted, sparse	yes*	12.7761	scattered	yes*	21.3366	widespread	no	0.516274	not expressed	no	11.0867	restricted	yes	6.45166	restricted	no	0.589966	not expressed	yes	0.44997	not expressed	yes	10.5409	restricted		8.09405	restricted		7.37285	restricted
Cerebellum	289	PRM	16.6559	widespread	yes*	2.18224	not expressed	no*	0.219647	not expressed	yes	18.2473	restricted		20.3776	widespread	no	2.27499	restricted	yes	11.6626	scattered	yes*	18.9606	widespread	no	0.463928	not expressed	no	10.0729	restricted	yes	2.81134	restricted, sparse	no	0.769708	not expressed	yes	0.528558	not expressed	yes	9.10763	restricted		0.0720663	restricted		7.12051	restricted
Cerebellum	290	COPY	16.5888	widespread	yes*	3.23141	not expressed	no*	0.348478	not expressed	yes	14.1099	restricted		18.3872	widespread	no	2.6951	restricted, sparse	yes*	11.2674	scattered	yes*	19.8619	widespread	no	0.977717	not expressed	no	11.54	restricted	yes	2.2734	not expressed	yes	1.04321	not expressed	yes	1.04705	not expressed	yes	8.78036	restricted		7.07022	restricted		7.89289	restricted
Cerebellum	291	PFL	14.2263	widespread	yes*	1.39472	not expressed	no*	0.61134	not expressed	yes	8.92932	restricted		18.601	widespread	no	3.57848	restricted	yes	7.83611	scattered	yes*	25.5749	widespread	no	1.05116	not expressed	no	5.00451	restricted	yes	1.10805	not expressed	yes	0.324436	not expressed	yes	0.543202	not expressed	yes	5.87988	restricted		6.41922	restricted		3.65721	restricted
Cerebellum	292	FL	20.4287	widespread	yes*	2.08104	not expressed	no*	1.04552	not expressed	yes	8.12297	restricted		20.5572	widespread	no	4.63029	restricted, sparse	yes*	10.1337	scattered	yes*	23.6041	widespread	no	1.19359	not expressed	no	12.9709	restricted	yes	1.78626	not expressed	yes	0.503365	not expressed	yes	0.385972	not expressed	yes	7.15128	restricted		10.035	restricted		4.12222	restricted
Cerebellum	293	FN	11.7939	widespread	yes*	2.71241	not expressed	no*	1.04918	not expressed	yes	2.68222	not expressed		17.1829	sparse	yes	3.44029	scattered	yes	9.35811	scattered	yes*	17.0312	widespread	no	0.977495	not expressed	yes	3.55784	scattered	no	8.37337	restricted	no	0.439907	not expressed	yes	0.667891	not expressed	yes	4.48701	scattered		12.235	scattered		7.80722	scattered
Cerebellum	294	IP	17.21	widespread	yes*	3.35509	not expressed	no*	1.20819	not expressed	yes	4.64865	not expressed		8.34764	sparse	yes	3.82989	scattered	yes	10.0026	scattered	yes*	17.2797	widespread	no	1.1755	not expressed	yes	4.2695	scattered	no	2.85877	restricted	no	0.437408	not expressed	yes	0.470514	not expressed	yes	4.36959	scattered		15.3622	scattered		8.74645	scattered
Cerebellum	295	DN	18.1349	widespread	yes*	2.07657	not expressed	no*	1.23734	not expressed	yes	8.12313	not expressed		9.17274	sparse	yes	3.67118	scattered	yes	11.6694	scattered	yes*	17.7179	widespread	no	0.520923	not expressed	yes	3.93632	scattered	no	0.715546	not expressed	yes	0.373776	not expressed	yes	0.355512	not expressed	yes	5.59208	scattered		8.07229	scattered		9.92065	scattered
[truncated: 343 more columns]

## Sheet: ARA ontology key
Major Region	Acronym	Name
Isocortex	FRP	Frontal pole, cerebral cortex
Isocortex	MOp	Primary motor area
Isocortex	MOs	Secondary motor area
Isocortex	SSp-n	Primary somatosensory area, nose
Isocortex	SSp-bfd	Primary somatosensory area, barrel field
Isocortex	SSp-ll	Primary somatosensory area, lower limb
Isocortex	SSp-m	Primary somatosensory area, mouth
Isocortex	SSp-ul	Primary somatosensory area, upper limb
Isocortex	SSp-tr	Primary somatosensory area, trunk
Isocortex	SSp-un	Primary somatosensory area, unassigned
Isocortex	SSs	Supplemental somatosensory area
Isocortex	GU	Gustatory areas
Isocortex	VISC	Visceral area
Isocortex	AUDd	Dorsal auditory area
Isocortex	AUDp	Primary auditory area
Isocortex	AUDpo	Posterior auditory area
Isocortex	AUDv	Ventral auditory area
Isocortex	VISal	Anterolateral visual area
Isocortex	VISam	Anteromedial visual area
Isocortex	VISl	Lateral visual area
Isocortex	VISp	Primary visual area
Isocortex	VISpl	Posterolateral visual area
Isocortex	VISpm	posteromedial visual area
Isocortex	ACAd	Anterior cingulate area, dorsal part
Isocortex	ACAv	Anterior cingulate area, ventral part
Isocortex	PL	Prelimbic area
Isocortex	ILA	Infralimbic area
Isocortex	ORBl	Orbital area, lateral part
Isocortex	ORBm	Orbital area, medial part
Isocortex	ORBvl	Orbital area, ventrolateral part
Isocortex	AId	Agranular insular area, dorsal part
Isocortex	AIp	Agranular insular area, posterior part
Isocortex	AIv	Agranular insular area, ventral part
Isocortex	RSPagl	Retrosplenial area, lateral agranular part
Isocortex	RSPd	Retrosplenial area, dorsal part
Isocortex	RSPv	Retrosplenial area, ventral part
Isocortex	PTLp	Posterior parietal association areas
Isocortex	TEa	Temporal association areas
Isocortex	PERI	Perirhinal area
Isocortex	ECT	Ectorhinal area
Olfactory Areas	MOB	Main olfactory bulb
Olfactory Areas	AOB	Accessory olfactory bulb
Olfactory Areas	AON	Anterior olfactory nucleus
Olfactory Areas	TT	Taenia tecta
Olfactory Areas	DP	Dorsal peduncular area
Olfactory Areas	PIR	Piriform area
Olfactory Areas	NLOT	Nucleus of the lateral olfactory tract
Olfactory Areas	COAa	Cortical amygdalar area, anterior part
Olfactory Areas	COAp	Cortical amygdalar area, posterior part
Olfactory Areas	PAA	Piriform-amygdalar area
Olfactory Areas	TR	Postpiriform transition area
Hippocampal Formation	CA1	Field CA1
Hippocampal Formation	CA2	Field CA2
Hippocampal Formation	CA3	Field CA3
Hippocampal Formation	DG	Dentate gyrus
Hippocampal Formation	FC	Fasciola cinerea
Hippocampal Formation	IG	Induseum griseum
Hippocampal Formation	ENTl	Entorhinal area, lateral part
Hippocampal Formation	ENTm	Entorhinal area, medial part, dorsal zone
Hippocampal Formation	ENTmv	Entorhinal area, medial part, ventral zone
Hippocampal Formation	PAR	Parasubiculum
Hippocampal Formation	POST	Postsubiculum
Hippocampal Formation	PRE	Presubiculum
Hippocampal Formation	SUBd	Subiculum, dorsal part
Hippocampal Formation	SUBv	Subiculum, ventral part
Cortical Subplate	CLA	Claustrum
Cortical Subplate	EPd	Endopiriform nucleus, dorsal part
Cortical Subplate	EPv	Endopiriform nucleus, ventral part
Cortical Subplate	LA	Lateral amygdalar nucleus
Cortical Subplate	BLA	Basolateral amygdalar nucleus
Cortical Subplate	BMA	Basomedial amygdalar nucleus
Cortical Subplate	PA	Posterior amygdalar nucleus
Striatum	CP	Caudoputamen
Striatum	ACB	Nucleus accumbens
Striatum	FS	Fundus of striatum
Striatum	OT	Olfactory tubercle
Striatum	LSc	Lateral septal nucleus, caudal (caudodorsal) part
Striatum	LSr	Lateral septal nucleus, rostral (rostroventral) part
Striatum	LSv	Lateral septal nucleus, ventral part
Striatum	SF	Septofimbrial nucleus
Striatum	SH	Septohippocampal nucleus
Striatum	AAA	Anterior amygdalar area
Striatum	BA	Bed nucleus of the accessory olfactory tract
Striatum	CEA	Central amygdalar nucleus
Striatum	IA	Intercalated amygdalar nucleus
Striatum	MEA	Medial amygdalar nucleus
Pallidum	GPe	Globus pallidus, external segment
Pallidum	GPi	Globus pallidus, internal segment
Pallidum	SI	Substantia innominata
Pallidum	MA	Magnocellular nucleus
Pallidum	MS	Medial septal nucleus
Pallidum	NDB	Diagonal band nucleus
Pallidum	TRS	Triangular nucleus of septum
Pallidum	BST	Bed nuclei of the stria terminalis
Pallidum	BAC	Bed nucleus of the anterior commissure
Thalamus	VAL	Ventral anterior-lateral complex of the thalamus
Thalamus	VM	Ventral medial nucleus of the thalamus
Thalamus	VPL	Ventral posterolateral nucleus of the thalamus
Thalamus	VPLpc	Ventral posterolateral nucleus of the thalamus, parvicellular part
Thalamus	VPM	Ventral posteromedial nucleus of the thalamus
Thalamus	VPMpc	Ventral posteromedial nucleus of the thalamus, parvicellular part
Thalamus	SPFm	Subparafascicular nucleus, magnocellular part
Thalamus	SPFp	Subparafascicular nucleus, parvicellular part
Thalamus	SPA	Subparafascicular area
Thalamus	PP	Peripeduncular nucleus
Thalamus	MGd	Medial geniculate complex, dorsal part
Thalamus	MGv	Medial geniculate complex, ventral part
Thalamus	MGm	Medial geniculate complex, medial part
Thalamus	LGd	Dorsal part of the lateral geniculate complex
Thalamus	LP	Lateral posterior nucleus of the thalamus
Thalamus	PO	Posterior complex of the thalamus
Thalamus	POL	Posterior limiting nucleus of the thalamus
Thalamus	SGN	Suprageniculate nucleus
Thalamus	AV	Anteroventral nucleus of thalamus
Thalamus	AMd	Anteromedial nucleus, dorsal part
Thalamus	AMv	Anteromedial nucleus, ventral part
Thalamus	AD	Anterodorsal nucleus
Thalamus	IAM	Interanteromedial nucleus of the thalamus
Thalamus	IAD	Interanterodorsal nucleus of the thalamus
Thalamus	LD	Lateral dorsal nucleus of thalamus
Thalamus	IMD	Intermediodorsal nucleus of the thalamus
Thalamus	MD	Mediodorsal nucleus of thalamus
Thalamus	SMT	Submedial nucleus of the thalamus
Thalamus	PR	Perireunensis nucleus
Thalamus	PVT	Paraventricular nucleus of the thalamus
Thalamus	PT	Parataenial nucleus
Thalamus	RE	Nucleus of reunions
Thalamus	RH	Rhomboid nucleus
Thalamus	CM	Central medial nucleus of the thalamus
Thalamus	PCN	Paracentral nucleus
Thalamus	CL	Central lateral nucleus of the thalamus
Thalamus	PF	Parafascicular nucleus
Thalamus	RT	Reticular nucleus of the thalamus
Thalamus	IGL	Intergeniculate leaflet of the lateral geniculate complex
Thalamus	LGv	Ventral part of the lateral geniculate complex
Thalamus	SubG	Subgeniculate nucleus
Thalamus	MH	Medial habenula
Thalamus	LH	Lateral habenula
Hypothalamus	SO	Supraoptic nucleus
Hypothalamus	ASO	Accessory supraoptic group
Hypothalamus	PVH	Paraventricular hypothalamic nucleus
Hypothalamus	PVa	Periventricular hypothalamic nucleus, anterior part
Hypothalamus	PVi	Periventricular hypothalamic nucleus, intermediate part
Hypothalamus	ARH	Arcuate hypothalamic nucleus
Hypothalamus	ADP	Anterodorsal preoptic nucleus
Hypothalamus	AVP	Anteroventral preoptic nucleus
Hypothalamus	AVPV	Anteroventral periventricular nucleus
Hypothalamus	DMH	Dorsomedial nucleus of the hypothalamus
Hypothalamus	MEPO	Median preoptic nucleus
Hypothalamus	MPO	Medial preoptic area
Hypothalamus	OV	Vascular organ of the lamina terminalis
Hypothalamus	PD	Posterodorsal preoptic nucleus
Hypothalamus	PS	Parastrial nucleus
Hypothalamus	PVp	Periventricular hypothalamic nucleus, posterior part
Hypothalamus	PVpo	Periventricular hypothalamic nucleus, preoptic part
Hypothalamus	SBPV	Subparaventricular zone
Hypothalamus	SCH	Suprachiasmatic nucleus
Hypothalamus	SFO	Subfornical organ
Hypothalamus	VLPO	Ventrolateral preoptic nucleus
Hypothalamus	AHN	Anterior hypothalamic nucleus
Hypothalamus	LM	Lateral mammillary nucleus
Hypothalamus	MM	Medial mammillary nucleus
Hypothalamus	SUM	Supramammillary nucleus
Hypothalamus	TMd	Tuberomammillary nucleus, dorsal part
Hypothalamus	TMv	Tuberomammillary nucleus, ventral part
Hypothalamus	MPN	Medial preoptic nucleus
Hypothalamus	PMd	Dorsal premammillary nucleus
Hypothalamus	PMv	Ventral premammillary nucleus
Hypothalamus	PVHd	Paraventricular hypothalamic nucleus, descending division
Hypothalamus	VMH	Ventromedial hypothalamic nucleus
Hypothalamus	PH	Posterior hypothalamic nucleus
Hypothalamus	LHA	Lateral hypothalamic area
Hypothalamus	LPO	Lateral preoptic area
Hypothalamus	PST	Preparasubthalamic nucleus
Hypothalamus	PSTN	Parasubthalamic nucleus
Hypothalamus	RCH	Retrochiasmatic area
Hypothalamus	STN	Subthalamic nucleus
Hypothalamus	TU	Tuberal nucleus
Hypothalamus	ZI	Zona incerta
Midbrain	SCs	Superior colliculus, sensory related
Midbrain	ICc	Inferior colliculus, central nucleus
Midbrain	ICd	Inferior colliculus, dorsal nucleus
Midbrain	ICe	Inferior colliculus, external nucleus
Midbrain	NB	Nucleus of the brachium of the inferior colliculus
Midbrain	SAG	Nucleus sagulum
Midbrain	PBG	Parabigeminal nucleus
Midbrain	MEV	Midbrain trigeminal nucleus
Midbrain	SNr	Substantia nigra, reticular part
Midbrain	VTA	Ventral tegmental area
Midbrain	RR	Midbrain reticular nucleus, retrorubral area
Midbrain	MRN	Midbrain reticular nucleus
Midbrain	SCm	Superior colliculus, motor related
Midbrain	PAG	Periaqueductal gray
Midbrain	APN	Anterior pretectal nucleus
Midbrain	MPT	Medial pretectal area
Midbrain	NOT	Nucleus of the optic tract
Midbrain	NPC	Nucleus of the posterior commissure
Midbrain	OP	Olivary pretectal nucleus
Midbrain	PPT	Posterior pretectal nucleus
Midbrain	CUN	Cuneiform nucleus
Midbrain	RN	Red nucleus
Midbrain	III	Oculomotor nucleus
Midbrain	EW	Edinger-Westphal nucleus
Midbrain	IV	Trochlear nucleus
Midbrain	VTN	Ventral tegmental nucleus
Midbrain	AT	Anterior tegmental nucleus
Midbrain	LT	Lateral terminal nucleus of the accessory optic tract
Midbrain	SNc	Substantia nigra, compact part
Midbrain	PPN	Pedunculopontine nucleus
Midbrain	IF	Interfascicular nucleus raphe
Midbrain	IPN	Interpeduncular nucleus
Midbrain	RL	Rostral linear nucleus raphe
Midbrain	CLI	Central linear nucleus raphe
Midbrain	DR	Dorsal nucleus raphe
Pons	NLL	Nucleus of the lateral lemniscus
Pons	PSV	Principal sensory nucleus of the trigeminal
Pons	PB	Parabrachial nucleus
Pons	SOC	Superior olivary complex
Pons	B	Barrington's nucleus
Pons	DTN	Dorsal tegmental nucleus
Pons	PCG	Pontine central gray
Pons	PG	Pontine gray
Pons	PRNc	Pontine reticular nucleus, caudal part
Pons	SG	Supragenual nucleus
Pons	SUT	Supratrigeminal nucleus
Pons	TRN	Tegmental reticular nucleus
Pons	V	Motor nucleus of trigeminal
Pons	CS	Superior central nucleus raphe
Pons	LC	Locus ceruleus
Pons	LDT	Laterodorsal tegmental nucleus
Pons	NI	Nucleus incertus
Pons	PRNr	Pontine reticular nucleus
Pons	RPO	Nucleus raphe pontis
Pons	SLC	Subceruleus nucleus
Pons	SLD	Sublaterodorsal nucleus
Medulla	AP	Area postrema
Medulla	DCO	Dorsal cochlear nucleus
Medulla	VCO	Ventral cochlear nucleus
Medulla	CU	Cuneate nucleus
Medulla	GR	Gracile nucleus
Medulla	ECU	External cuneate nucleus
Medulla	NTB	Nucleus of the trapezoid body
Medulla	NTS	Nucleus of the solitary tract
Medulla	SPVC	Spinal nucleus of the trigeminal, caudal part
Medulla	SPVI	Spinal nucleus of the trigeminal, interpolar part
Medulla	SPVO	Spinal nucleus of the trigeminal, oral part
Medulla	VI	Abducens nucleus
Medulla	VII	Facial motor nucleus
Medulla	ACVII	Accessory facial motor nucleus
Medulla	AMB	Nucleus ambiguus
Medulla	DMX	Dorsal motor nucleus of the vagus nerve
Medulla	GRN	Gigantocellular reticular nucleus
Medulla	ICB	Infracerebellar nucleus
Medulla	IO	Inferior olivary complex
Medulla	IRN	Intermediate reticular nucleus
Medulla	ISN	Inferior salivatory nucleus
Medulla	LIN	Linear nucleus of the medulla
Medulla	LRN	Lateral reticular nucleus
Medulla	MARN	Magnocellular reticular nucleus
Medulla	MDRNd	Medullary reticular nucleus, dorsal part
Medulla	MDRNv	Medullary reticular nucleus, ventral part
Medulla	PARN	Parvicellular reticular nucleus
Medulla	PAS	Parasolitary nucleus
Medulla	PGRNd	Paragigantocellular reticular nucleus, dorsal part
Medulla	PGRNl	Paragigantocellular reticular nucleus, lateral part
Medulla	NR	Nucleus of Roller
Medulla	PRP	Nucleus prepositus
Medulla	PPY	Parapyramidal nucleus
Medulla	LAV	Lateral vestibular nucleus
Medulla	MV	Medial vestibular nucleus
Medulla	SPIV	Spinal vestibular nucleus
Medulla	SUV	Superior vestibular nucleus
Medulla	x	Nucleus x
Medulla	XII	Hypoglossal nucleus
Medulla	y	Nucleus y
Medulla	RM	Nucleus raphe magnus
Medulla	RPA	Nucleus raphe pallidus
Medulla	RO	Nucleus raphe obscurus
Cerebellar Cortex	LING	Lingula (I)
Cerebellar Cortex	CENT	Central lobule
Cerebellar Cortex	CUL	Culmen
Cerebellar Cortex	DEC	Declive (VI)
Cerebellar Cortex	FOTU	Folium-tuber vermis (VII)
Cerebellar Cortex	PYR	Pyramus (VIII)
Cerebellar Cortex	UVU	Uvula (IX)
Cerebellar Cortex	NOD	Nodulus (X)
Cerebellar Cortex	SIM	Simple lobule
Cerebellar Cortex	AN	Ansiform lobule
Cerebellar Cortex	PRM	Paramedian lobule
Cerebellar Cortex	COPY	Copula pyramidis
Cerebellar Cortex	PFL	Paraflocculus
Cerebellar Cortex	FL	Flocculus
Cerebellar Nuclei	FN	Fastigial nucleus
Cerebellar Nuclei	IP	Interposed nucleus
Cerebellar Nuclei	DN	Dentate nucleus
