# Supplementary material for: Anatomical characterization of Cre driver mice for neural circuit mapping and manipulation
Source: Front Neural Circuits. 2014 Jul 10;8:76. doi: 10.3389/fncir.2014.00076 (PMC4091307; doi:10.3389/fncir.2014.00076)
Supplement: Supplementary file 3 [file DataSheet3.XLSX]

## Sheet: Suppl. Table 3
		Major Division	Isocortex
		Ontology order	0.5		1		2		3		4		5		6		7		8		9		10		11		12		13		14		15		16		17		18		19		20		21		22		23
		Structure	AVERAGE		FRP		MOp		Mos (sagittal - na)		SSp-n		SSp-bfd		SSp-ll		SSp-m		SSp-ul		SSp-tr		SSp-un		SSs (sagittal - na)		GU		VISC		AUDd (sagittal - na)		AUDp (sagittal - na)		AUDpo (sagittal - na)		AUDv (sagittal - na)		VISal (sagittal - na)		VISam (sagittal - na)		VISl (sagittal - na)		VISp		VISpl (sagittal - na)		VISpm (sagittal - na)
Image id	Cre Line	Orientation	Fold Change	Expression Pattern	Fold Change	Expression Pattern	Fold Change	Expression Pattern	Fold Change	Expression Pattern	Fold Change	Expression Pattern	Fold Change	Expression Pattern	Fold Change	Expression Pattern	Fold Change	Expression Pattern	Fold Change	Expression Pattern	Fold Change	Expression Pattern	Fold Change	Expression Pattern	Fold Change	Expression Pattern	Fold Change	Expression Pattern	Fold Change	Expression Pattern	Fold Change	Expression Pattern	Fold Change	Expression Pattern	Fold Change	Expression Pattern	Fold Change	Expression Pattern	Fold Change	Expression Pattern	Fold Change	Expression Pattern	Fold Change	Expression Pattern	Fold Change	Expression Pattern	Fold Change	Expression Pattern	Fold Change
100095135	A930038C07Rik-Tg1-Cre	sagittal	1.20001	widespread	0.795813	widespread	0.876623	widespread	0.755827	na	1.33558	na	0.977944	widespread	0.81459	na	1.11149	na	0.837325	na	0.811872	na		na	1.12938	na	1.49202	widespread	1.42179	widespread	1.42399	na	1.56432	na		na	1.31456	na	1.32139	na	1.03014	na	1.39358	na	1.12644	widespread	1.26798	na	1.10634
81578100	A930038C07Rik-Tg4-Cre	sagittal	1.3664	laminar, sparse	1.36423	not expressed	1.0849	laminar, sparse	1.1345	na	1.45207	na	1.43063	laminar, sparse	1.31133	na	1.07854	na	1.06047	na	1.17922	na		na	1.47294	na	1.30918	laminar, sparse	1.48245	laminar, sparse	1.20558	na	1.03048	na	0.982816	na	1.33422	na	1.77361	na	1.32773	na	1.74636	na	1.50677	laminar, sparse	1.67862	na	1.1978
100095108	Agrp-IRES-Cre	coronal	1.41907	not expressed		not expressed	1.07212	not expressed	1.38737	not expressed	1.0793	not expressed	1.16301	not expressed	1.37857	not expressed	0.926557	not expressed	1.06257	not expressed	1.40215	not expressed		not expressed	1.4112	not expressed	1.22637	not expressed	1.56445	not expressed	1.31737	not expressed	1.52835	not expressed	1.6351	not expressed	1.59124	not expressed	1.33056	not expressed	1.13598	not expressed	1.26516	not expressed	1.10186	not expressed	0.406513	not expressed	0.477463
175707330	Calb2-CreERT2	sagittal	0.583002	sparse	0.999365	sparse	0.235124	sparse	0.26338	na	0.363272	na	0.380619	sparse	0.289924	na	0.250428	na	0.238705	na	0.327211	na		na	0.585658	na	0.385303	sparse	0.461378	sparse	0.873066	na	1.19252	na		na	1.09714	na	0.593033	na	0.499993	na	0.870146	na	0.573699	sparse	0.698146	na	0.901301
157077827	Calb2-IRES-Cre	coronal	0.55903	enriched	0.281253	sparse	0.470821	sparse	0.440736	sparse	0.322886	sparse	0.554493	enriched	0.750434	enriched	0.310818	sparse	0.589238	enriched	0.706501	enriched	0.377206	sparse	0.458445	sparse	0.433193	sparse	0.665415	sparse	0.452442	sparse	0.480663	sparse	0.422707	sparse	0.661078	enriched	0.471347	enriched	0.569616	enriched	0.537425	sparse	0.509175	enriched	0.450303	sparse	0.334206
81658003	Camk2a-Cre	sagittal	1.98543	widespread	0.923928	widespread	1.48388	widespread	1.35615	na	2.45099	na	2.14181	widespread	1.74611	na	1.86236	na	1.60866	na	1.65144	na		na	2.42214	na	2.21543	widespread	2.45675	widespread	2.28136	na		na		na		na	2.60906	na	1.83106	na	2.70335	na	1.89981	widespread	2.45902	na	1.47902
81658011	Camk2a-CreERT2	sagittal	1.4509	widespread	0.703964	widespread	1.05677	widespread	1.02784	na	1.74661	na	1.58245	widespread	1.22895	na	1.43281	na	1.31912	na	1.35595	na		na	1.60113	na	1.63514	widespread	1.78878	widespread	1.66734	na	1.51935	na	1.52045	na	1.58677	na	1.64476	na	1.35235	na	1.71545	na	1.53527	widespread	1.76265	na	1.30792
81578102	Cart-Tg1-Cre	sagittal	1.292	widespread	0.782473	widespread	1.32468	widespread	1.10644	na	2.36389	na	1.3527	widespread	1.18666	na	1.77444	na	1.23765	na	0.956828	na		na	2.04467	na	2.36606	widespread	1.98002	widespread	1.28492	na	0.997047	na	1.03634	na	1.24865	na	1.07098	na	1.24584	na	1.10604	na	0.959258	widespread	0.829032	na	0.839384
114374081	Cck-CreERT2	sagittal	3.55598	enriched	0.73358	enriched	3.38549	enriched	3.43706	na	4.28189	na	3.97025	enriched	3.87168	na	4.17655	na	3.96117	na	4.24347	na		na	4.20301	na	5.3237	enriched		enriched		na		na		na		na	2.20109	na	3.16344	na	1.424	na	2.92187	enriched	3.29559	na	3.20336
127171870	Cck-IRES-Cre	coronal	1.97497	widespread	1.03004	widespread	1.54124	widespread	1.29534	widespread	2.09107	widespread	2.42574	widespread	2.52677	widespread	1.68365	widespread	2.22166	widespread	2.51233	widespread		widespread	2.21703	widespread	2.06374	widespread	2.16436	widespread	2.45608	widespread	2.30272	widespread	2.13748	widespread	2.18784	widespread	2.4037	widespread	2.65273	widespread	2.10547	widespread	2.07101	widespread	1.82249	widespread	1.47376
112609477	Cdhr1-Cre_KG66	sagittal	0.63412	sparse	0.912698	not expressed	1.15439	sparse	0.918989	na	0.0738462	na	0.0914657	sparse	0.949121	na	0.0929353	na	0.165193	na	0.517534	na		na	0.146084	na	0.125044	not expressed	0.205552	sparse	0.1236	na		na		na		na	0.200238	na	1.17288	na	0.20735	na	0.207408	sparse	0.198127	na	0.496531
81034299	Chat-IRES-Cre	coronal	1.08959	not expressed		not expressed	0.679791	not expressed	0.95102	not expressed	0.754001	not expressed	0.639624	not expressed	1.00867	not expressed	0.73705	not expressed	0.813746	not expressed	0.675943	not expressed		not expressed	0.681904	not expressed	0.810271	not expressed	0.708065	not expressed	1.02757	not expressed	1.18398	not expressed	1.34562	not expressed	1.13878	not expressed	1.13716	not expressed	1.05237	not expressed	1.38232	not expressed	1.11278	not expressed	1.48861	not expressed	1.08231
100134129	Chat-IRES-CreER	coronal	0.935771	not expressed	0.808041	not expressed	0.657293	not expressed	0.755928	not expressed	0.457912	not expressed	0.579049	not expressed	0.851556	not expressed	0.549658	not expressed	0.71943	not expressed	0.739314	not expressed		not expressed	0.455911	not expressed	0.384972	not expressed	0.315182	not expressed	0.87682	not expressed	0.826164	not expressed	1.41386	not expressed	0.665609	not expressed	0.877621	not expressed	0.840261	not expressed	1.01174	not expressed	1.11734	not expressed	0.889752	not expressed	0.81541
293794945	Chrna2-Cre_OE25	coronal	1.15961	laminar		laminar	0.851477	laminar	1.03242	laminar	0.848579	laminar	0.860964	laminar	1.1249	laminar	0.822344	laminar	0.950786	laminar	1.27365	laminar	0.694361	laminar	0.866935	laminar	0.716134	laminar	1.03953	laminar	1.09014	laminar	1.34543	laminar	1.46282	laminar	1.24878	laminar	1.02089	laminar	1.29148	laminar	1.04843	laminar	0.985917	laminar	0.979044	laminar	0.997647
286680569	Chrnb4-Cre_OL57	coronal	1.00094	widespread		widespread	1.08016	widespread	1.17166	widespread	0.89437	widespread	1.35418	widespread	1.47574	widespread	0.782487	widespread	1.16636	widespread	1.55502	widespread	0.852704	widespread	1.18546	widespread	0.585797	widespread	1.00076	widespread	1.36862	widespread	1.38871	widespread	0.838133	widespread	1.49958	widespread	1.12953	widespread	0.89662	widespread	0.156832	widespread	0.545137	widespread	0.528914	widespread	0.671539
148055030	Cnnm2-Cre_KD18	coronal	1.84239	widespread	0.724504	widespread	2.05752	widespread	1.97837	widespread	2.45132	widespread	2.44696	widespread	2.36765	widespread	2.26821	widespread	2.35333	widespread	2.17431	widespread	1.92768	widespread	2.25852	widespread	2.29367	widespread	2.43289	widespread	2.16859	widespread	2.30429	widespread	1.4909	widespread	2.15731	widespread	1.97035	widespread	2.06536	widespread	1.60335	widespread	1.57148	widespread	0.797307	widespread	0.589145
100144085	Cort-T2A-Cre	coronal	2.9673	scattered	4.3766	scattered	3.78793	scattered	4.29734	scattered	3.54137	scattered	3.14448	scattered	3.65382	scattered	3.60611	scattered	3.52995	scattered	3.53212	scattered		scattered	2.89621	scattered	3.14096	scattered	3.02597	scattered	2.81506	scattered	2.82962	scattered	2.41144	scattered	2.79453	scattered	2.33832	scattered	2.15013	scattered	3.13969	scattered	2.35695	scattered	2.51359	scattered	1.36347
100104682	Crh-IRES-Cre (BL)	coronal	1.56741	enriched	3.83007	scattered	0.88369	scattered	1.1268	scattered	2.98626	scattered	1.43498	scattered	1.4696	scattered	1.68685	scattered	1.68061	scattered	1.39497	scattered		scattered	1.25732	scattered	1.67436	scattered	1.24571	scattered	1.36051	scattered	1.33832	scattered	1.48647	scattered	1.23197	scattered	1.47783	scattered	1.15188	scattered	2.01134	scattered	1.77211	scattered	2.29532	scattered	1.72681
146453876	Crh-IRES-Cre (ZJH)	coronal	1.11995	scattered	1.24822	scattered	1.24701	scattered	1.26756	scattered	1.10162	scattered	1.24856	scattered	1.40815	scattered	1.30427	scattered	1.33832	scattered	1.25273	scattered		scattered	1.14955	scattered	1.22265	scattered	1.21221	scattered	1.10657	scattered	1.20653	scattered	0.621426	scattered	1.26911	scattered	0.832252	scattered	1.0399	scattered	1.32134	scattered	0.893085	scattered	0.907215	scattered	0.646662
100104691	Ctgf-Tg1-Cre	sagittal	1.44442	widespread	1.00618	widespread	1.26246	widespread	1.06752	na	1.76065	na	1.68896	widespread	1.46893	na	1.52557	na	1.38543	na	1.41624	na		na	1.80218	na	1.68809	widespread	1.85888	widespread	1.6289	na	1.55623	na		na	1.8835	na	1.90956	na	1.45445	na	1.95957	na	1.31222	widespread	1.344	na	0.918009
81657999	Ctgf-Tg2-Cre	sagittal	1.3939	widespread	0.799355	widespread	1.12716	widespread	0.852347	na	1.70131	na	1.45339	widespread	1.2179	na	1.21787	na	1.18511	na	1.27473	na		na	1.71892	na	1.7365	widespread	1.82684	widespread	1.63664	na	1.57676	na		na	1.69348	na	1.65157	na	1.33994	na	1.89066	na	1.30638	widespread	1.41578	na	1.03135
100144051	Cux2-Cre	sagittal	1.14266	enriched	0.520034	enriched	1.01248	enriched	1.01943	na	1.46396	na	1.27376	enriched	1.14954	na	1.17343	na	1.06625	na	1.12088	na		na	1.20364	na	1.35715	enriched	1.12723	enriched	1.09552	na	0.881135	na	0.745831	na	0.889778	na	1.35665	na	1.37415	na	1.48787	na	1.10385	enriched	1.30772	na	1.00256
127171579	Cux2-CreERT2	sagittal	1.51887	enriched	0.424363	enriched	1.33753	enriched	1.35803	na	0.483988	na	1.73962	enriched	1.54183	na	1.57342	na	1.68018	na	1.78128	na		na	1.13571	na	1.327	enriched		enriched		na		na		na		na	1.82154	na	1.95622	na	0.678651	na	2.08906	enriched	2.03911	na	2.46598
113098763	Cux2-IRES-Cre	sagittal	1.25191	widespread	0.668455	widespread	1.01964	widespread	0.947717	na	1.30774	na	1.3006	widespread	1.03186	na	1.22691	na	1.07899	na	1.12227	na		na	1.37675	na	1.39133	widespread	1.4761	widespread	1.46099	na		na		na		na	1.47324	na	1.18471	na	1.501	na	1.164	widespread	1.30888	na	1.42649
81578110	Cyp39a1-Tg1-Cre	sagittal	1.25054	widespread	0.850322	widespread	0.946533	widespread	0.881267	na	1.44408	na	1.21274	widespread	1.00936	na	1.04615	na	1.01726	na	1.02067	na		na	1.53456	na	1.35024	widespread	1.63136	widespread	1.53755	na	1.57586	na	1.41449	na	1.57345	na	1.19547	na	1.08608	na	1.36606	na	1.11862	widespread	1.2917	na	1.17588
81578106	Cyp39a1-Tg7-Cre	sagittal	1.19582	widespread	0.634542	widespread	0.921425	widespread	0.886792	na	1.3059	na	1.20368	widespread	0.998702	na	1.02502	na	0.955903	na	1.03423	na		na	1.15611	na	1.14596	widespread	1.17584	widespread	1.34907	na	1.15271	na	1.2013	na	1.05383	na	1.32512	na	1.13687	na	1.59673	na	1.17996	widespread	1.44242	na	1.57602
100141756	Dbh-Cre_KH212	coronal	1.68936	not expressed		not expressed	1.17064	not expressed	1.22006	not expressed	0.341241	not expressed	0.891179	not expressed	1.24687	not expressed	0.541892	not expressed	0.745437	not expressed	1.29856	not expressed		not expressed	0.668167	not expressed	0.544664	not expressed	0.395457	not expressed	2.02973	not expressed	2.26975	not expressed	7.91938	not expressed	1.6761	not expressed	2.80114	not expressed	1.78918	not expressed	3.53556	not expressed	2.22831	not expressed	1.3942	not expressed	0.992796
161163353	Dbx1-IRES-Cre	coronal	0.257994	sparse	0.371472	sparse	0.233709	sparse	0.239361	sparse	0.143471	sparse	0.256063	sparse	0.330018	sparse	0.155328	sparse	0.240437	sparse	0.306493	sparse		sparse	0.225296	sparse	0.16731	sparse	0.246365	sparse	0.270325	sparse	0.278357	sparse	0.271977	sparse	0.282708	sparse	0.237782	sparse	0.251486	sparse	0.162252	sparse	0.159066	sparse	0.109159	sparse	0.142998
112609329	Dcx-Cre-35	sagittal	1.0631	widespread	0.413349	widespread	0.820734	widespread	0.849187	na	1.25146	na	1.13038	widespread	0.917368	na	0.902844	na	0.789595	na	0.873899	na		na	1.26041	na	1.11903	widespread	1.31977	widespread	0.941455	na		na		na		na	1.03796	na	1.05348	na	1.19887	na	0.891255	widespread	0.891384	na	0.645061
100132636	Dcx-Cre-38	sagittal	1.13307	widespread	0.843413	widespread	0.886439	widespread	0.837123	na	1.34936	na	1.22336	widespread	0.931389	na	1.14841	na	0.917702	na	0.953446	na		na	1.17017	na	1.32513	widespread	1.29722	widespread	1.02812	na		na		na		na	1.15857	na	1.00519	na	1.27908	na	0.944231	widespread	1.02187	na	1.09511
111191638	Dcx-CreERT2	sagittal	1.3469	enriched	0.975263	scattered	1.01484	enriched	1.04779	na	1.18264	na	1.03597	enriched	0.942618	na	0.884852	na	0.817393	na	1.12459	na		na	1.40404	na	1.45688	scattered	1.30478	scattered	1.87728	na	1.67815	na		na	1.85045	na	1.57762	na	1.48553	na	1.85062	na	1.04956	enriched	0.991088	na	1.01034
175707478	Dlx1-CreERT2	sagittal	1.29464	sparse	1.45249	sparse	0.937142	sparse	0.964968	na	0.832581	na	0.900588	sparse	1.147	na	0.890806	na	0.864087	na	1.06841	na	0.973533	na	1.00851	na	1.14629	sparse	0.926078	sparse	1.28909	na	1.07179	na		na	1.3711	na	1.39069	na	1.28371	na	1.45889	na	1.35513	sparse	1.41547	na	1.70826
113100351	Dlx5-CreERT2	sagittal	1.40725	scattered	0.841828	scattered	1.26443	scattered	1.32855	na	1.08214	na	1.36726	scattered	1.36609	na	1.157	na	1.10411	na	1.27023	na		na	1.56173	na	1.34253	scattered		scattered	1.13779	na		na		na		na	1.69503	na	1.52822	na	1.88864	na	1.31411	scattered	1.34896	na	1.65589
81268756	Drd1a-Cre	sagittal	1.77229	widespread	1.13188	widespread	1.43845	widespread	1.2734	na	2.25617	na	2.07587	widespread	1.66714	na	2.09199	na	1.86584	na	1.63866	na		na	2.26183	na	2.33806	widespread	2.19769	widespread	2.34898	na	2.01443	na	1.94134	na	1.60767	na	1.65803	na	1.21149	na	2.05787	na	1.67334	widespread	2.03941	na	1.53519
113100275	Drd2-Cre_ER44	sagittal	1.00715	enriched	0.610858	enriched	0.635433	enriched	0.587059	na	0.576719	na	0.565503	enriched	0.577223	na	0.617277	na	0.524252	na	0.482576	na		na	0.710438	na	0.783339	sparse	0.886619	sparse	0.906732	na	1.23205	na		na	1.58791	na	0.714097	na	0.968421	na	1.21172	na	0.65709	enriched	0.926441	na	1.21285
286680355	Drd3-Cre_KI196	coronal	1.13293	widespread	1.18534	widespread	1.24469	widespread	1.23945	widespread	1.35678	widespread	1.33536	widespread	1.34433	widespread	1.29376	widespread	1.30535	widespread	1.30206	widespread	1.27337	widespread	1.31701	widespread	1.38201	widespread	1.39067	widespread	1.35423	widespread	1.43078	widespread	0.916906	widespread	1.44539	widespread	1.08077	widespread	0.917609	widespread	0.538722	widespread	0.684141	widespread	0.385472	widespread	0.670221
286679927	Efr3a-Cre_NO108	coronal	1.20806	scattered	1.00718	scattered	1.26855	scattered	1.14924	scattered	1.3001	scattered	1.26935	scattered	1.48893	scattered	1.21223	scattered	1.349	scattered	1.24918	scattered	1.24387	scattered	1.2528	scattered	1.30517	scattered	1.23741	scattered	1.45433	scattered	1.43932	scattered	1.31766	scattered	1.37959	scattered	1.28013	scattered	1.07557	scattered	1.17198	scattered	0.999713	scattered	1.26133	scattered	0.746863
100095125	Emx1-IRES-Cre	sagittal	3.29081	widespread	1.48152	widespread	2.28559	widespread	2.37422	na	3.78731	na	3.34489	widespread	2.61957	na	2.8898	na	2.4499	na	2.80727	na		na	3.84213	na	3.57774	widespread	3.75926	widespread	4.05707	na		na		na		na	3.79244	na	2.94804	na	4.28198	na	3.31052	widespread	3.74718	na	3.41021
100132455	Eno2-Cre	sagittal	1.44171	widespread	0.745661	widespread	1.12461	widespread	1.06558	na	1.73952	na	1.52272	widespread	1.29551	na	1.32057	na	1.18277	na	1.29314	na		na	1.73599	na	1.723	widespread	1.91631	widespread	1.57409	na		na		na		na	1.56499	na	1.42317	na	1.57897	na	1.28966	widespread	1.51258	na	1.07041
100130482	Erbb4-2A-CreERT2	coronal	1.88747	scattered	1.51156	scattered	1.77862	scattered	1.96818	scattered	1.65947	scattered	1.86618	scattered	2.0204	scattered	1.73786	scattered	1.80255	scattered	2.11106	scattered	1.99405	scattered	1.98229	scattered	1.90616	scattered	2.29499	scattered	2.13945	scattered	2.19481	scattered	1.89562	scattered	2.28834	scattered	1.85168	scattered	2.22635	scattered	1.87506	scattered	1.78455	scattered	1.54235	scattered	1.42132
156350472	Etv1-CreERT2	sagittal	1.37928	enriched	0.889357	enriched	1.07983	enriched	1.00358	na	1.3234	na	1.4254	enriched	1.13857	na	0.95204	na	0.949499	na	1.08279	na		na	1.66514	na	1.26766	enriched	1.66159	enriched	1.61006	na	0.355002	na		na	0.366673	na	2.0356	na	1.53415	na	2.36855	na	1.11277	enriched	1.27869	na	1.28259
127171365	Gabra6-IRES-Cre	coronal	0.829988	scattered		scattered	0.454296	scattered	0.404099	scattered	0.349414	scattered	0.928457	scattered	0.666609	scattered	0.253568	scattered	0.523503	scattered	1.07089	scattered		scattered	0.83944	scattered	0.3083	scattered	0.711284	scattered	1.16291	scattered	1.05078	scattered	1.14803	scattered	1.09451	scattered	1.17431	scattered	1.12653	scattered	1.21703	scattered	1.05844	scattered	0.987037	scattered	0.968349
174689097	Gabrr3-Cre_KC112	coronal	0.860637	enriched		sparse	0.654087	enriched	0.804282	enriched	0.875853	enriched	1.05829	enriched	0.832472	enriched	0.700915	enriched	0.824916	enriched	0.818946	enriched	0.530563	enriched	1.31458	enriched	0.655	scattered	1.22128	enriched	1.01263	enriched	1.1083	enriched	0.692529	enriched	1.37412	enriched	0.744426	sparse	0.812172	sparse	0.868539	sparse	0.712139	sparse	0.803449	sparse	0.81335
176751433	Gad2-CreERT2	sagittal	0.876116	scattered	0.868051	scattered	0.618087	scattered	0.66535	na	0.71392	na	0.725198	scattered	0.6743	na	0.620024	na	0.513377	na	0.627981	na	0.649606	na	0.776972	na	0.835954	scattered	0.887184	scattered	0.938443	na		na		na		na	1.0319	na	0.805657	na	1.37609	na	0.667818	scattered	0.911245	na	0.991897
100141727	Gad2-IRES-Cre	sagittal	0.91436	scattered	0.618129	scattered	0.701434	scattered	0.624813	na	0.961596	na	0.911562	scattered	0.81154	na	0.853334	na	0.852012	na	0.958069	na		na	1.43129	na	1.00501	scattered	1.71615	scattered	0.84937	na		na		na		na	0.848598	na	0.881594	na	0.725097	na	0.927329	scattered	0.763786	na	0.759206
100130949	Gal-Cre_KI87	coronal	0.293298	laminar, sparse	0.361677	not expressed	0.338652	not expressed	0.373984	not expressed	0.215069	not expressed	0.26864	not expressed	0.338085	not expressed	0.189699	not expressed	0.227468	not expressed	0.322888	not expressed	0.229852	not expressed	0.300106	not expressed	0.292948	not expressed	0.360157	not expressed	0.296719	laminar, sparse	0.379774	laminar, sparse	0.242036	laminar, sparse	0.432599	laminar, sparse	0.182976	laminar, sparse	0.0824709	laminar, sparse	0.174972	not expressed	0.0974056	laminar, sparse	0.113005	not expressed	0.0784405
100134128	Gng7-Cre_KH71	coronal	1.32956	enriched	1.44835	enriched	1.35971	enriched	1.41338	enriched	1.54536	enriched	1.25394	enriched	1.56287	enriched	1.49069	enriched	1.42215	enriched	1.31227	enriched		enriched	1.31839	enriched	1.79429	enriched	1.59455	enriched	1.31428	enriched	1.44366	enriched	1.41885	enriched	1.55556	enriched	0.943444	enriched	1.03566	enriched	0.63276	enriched	0.559595	enriched	0.0523932	enriched	0.518041
113099846	Gnrh1-Cre	coronal	1.12007	not expressed	1.75423	not expressed	0.901234	not expressed	1.18574	not expressed	0.425831	not expressed	1.14532	not expressed	1.08249	not expressed	0.648586	not expressed	0.850473	not expressed	1.03219	not expressed		not expressed	0.684147	not expressed	0.66535	not expressed	0.716433	not expressed	1.30558	not expressed	1.35167	not expressed	1.61376	not expressed	1.10577	not expressed	1.43043	not expressed	1.6806	not expressed	1.51351	not expressed	1.18239	not expressed	0.710448	not expressed	0.92332
174688996	Gpr26-Cre_KO250	sagittal	1.49343	enriched	0.646305	scattered	2.10553	scattered	1.94776	na	1.93041	na	1.34594	enriched	1.50035	na	1.60243	na	1.18864	na	1.16577	na		na	1.68869	na	2.34818	enriched	1.58179	enriched	1.52874	na	1.39312	na		na	1.54279	na	1.07683	na	0.906265	na	1.16744	na	0.572836	enriched	0.735031	na	0.684673
100142470	Grik4-Cre	sagittal	0.400359	sparse	0.436532	sparse	0.26036	sparse	0.341968	na	0.270726	na	0.318346	sparse	0.235026	na	0.26015	na	0.24614	na	0.264998	na		na	0.270956	na	0.280759	sparse	0.328238	sparse	0.310661	na	0.289782	na	0.3029	na	0.306002	na	0.34291	na	0.340897	na	0.395699	na	0.280632	sparse	0.305927	na	0.232801
161162172	Grm2-Cre_MR90	coronal	1.21539	scattered	0.252848	scattered	1.43173	scattered	1.50856	scattered	1.62613	scattered	1.38776	scattered	1.53037	scattered	1.52053	scattered	1.57511	scattered	1.51654	scattered		scattered	1.71341	scattered	1.56858	scattered	1.64107	scattered	1.22049	scattered	1.27011	scattered	0.641079	scattered	1.48319	scattered	1.18903	scattered	1.07584	scattered	0.469196	scattered	0.59628	scattered	0.118605	scattered	0.238331
174687452	Grp-Cre_KH288	coronal	1.44869	enriched	0.680435	scattered	1.86746	laminar	2.21533	laminar	0.673688	sparse	1.04695	sparse	1.13996	sparse	0.895283	sparse	1.1433	sparse	1.04821	sparse		sparse	0.945844	not expressed	2.02051	sparse	1.10711	not expressed	1.40749	not expressed	1.53433	not expressed	2.20987	not expressed	1.41342	not expressed	1.51035	not expressed	1.33197	not expressed	1.13692	not expressed	1.07593	not expressed	1.22584	not expressed	0.613592
100146122	Hdc-Cre_IM1	coronal	1.29837	not expressed	0.948211	not expressed	1.13463	not expressed	1.3971	not expressed	0.628266	not expressed	0.822641	not expressed	0.77422	not expressed	1.00179	not expressed	0.988299	not expressed	0.885884	not expressed		not expressed	0.7141	not expressed	0.792035	not expressed	0.690197	not expressed	1.87547	not expressed	2.16584	not expressed	1.98158	not expressed	2.03082	not expressed	1.84961	not expressed	1.95521	not expressed	1.64849	not expressed	1.61789	not expressed	1.26339	not expressed	1.34313
174686166	Htr2a-Cre_KM207	coronal	0.830642	enriched		enriched	0.749156	enriched	0.81215	enriched	0.765399	enriched	0.56065	enriched	0.819506	enriched	0.649372	enriched	0.667246	enriched	0.62718	enriched		enriched	0.684236	enriched	0.590421	enriched	0.813094	enriched	0.674885	enriched	0.719569	enriched	0.979424	enriched	0.802747	enriched	0.741107	sparse	0.834798	sparse	0.617716	sparse	0.603997	sparse	0.486238	sparse	0.521532
180309317	Ins2-Cre	coronal	1.45305	scattered	2.34407	scattered	1.30167	scattered	1.03191	scattered	1.86597	scattered	1.31917	scattered	1.09829	scattered	1.77493	scattered	1.32522	scattered	1.01406	scattered	1.58117	scattered	1.70929	scattered	2.44471	scattered	2.11071	scattered	1.13315	scattered	1.32359	scattered	0.930233	scattered	1.57888	scattered	0.99289	scattered	1.162	scattered	0.875938	scattered	0.818385	scattered	0.401294	scattered	0.292377
100141753	Kcnc2-Cre	sagittal	0.616949	scattered	0.384846	scattered	0.559346	scattered	0.536758	na	0.486494	na	0.440746	scattered	0.574141	na	0.359571	na	0.386679	na	0.516462	na		na	0.373004	na	0.441996	scattered	0.421964	scattered	0.429338	na	0.264775	na		na	0.222613	na	0.562314	na	0.774123	na	0.682293	na	0.495531	scattered	0.536143	na	0.598629
112608738	Kiss1-Cre	coronal	2.60949	enriched	0.941985	enriched	2.77372	enriched	2.22395	enriched	3.21045	enriched	3.31131	enriched	3.6142	enriched	3.22841	enriched	3.52241	enriched	3.36165	enriched		enriched	2.70207	enriched	3.13235	enriched	2.17515	enriched	2.63751	enriched	1.76244	enriched	2.08803	enriched	2.22662	enriched	3.96228	enriched	3.48126	enriched	4.15452	enriched	3.78123	enriched	2.96669	enriched	2.5214
100138054	Lepr-IRES-Cre	coronal	0.746953	sparse		sparse	0.532488	sparse	0.671015	sparse	0.266533	sparse	0.463359	sparse	0.72619	sparse	0.21127	sparse	0.421801	sparse	0.613738	sparse		sparse	0.397599	sparse	0.421751	sparse	0.483502	sparse	0.65091	laminar, sparse	0.719433	laminar, sparse	0.626959	laminar, sparse	0.82805	laminar, sparse	0.501116	sparse	0.562684	sparse	0.640272	sparse	0.538167	sparse	0.597756	sparse	0.410797
100141722	Lhx6-CreERT2	sagittal	1.22739	sparse	0.646538	sparse	0.957212	sparse	0.810075	na	1.37047	na	1.13478	sparse	1.07176	na	0.932045	na	1.07804	na	1.16267	na		na	1.39132	na	1.76488	sparse	1.75362	sparse	1.13569	na		na		na		na	1.23649	na	1.33475	na	1.48557	na	0.952293	sparse	0.844836	na	1.01575
266887165	Lypd6-Cre_KL156	coronal	0.944908	laminar, sparse			0.652958	not expressed	0.897704	not expressed	0.372157	not expressed	0.671462	not expressed	0.961701	not expressed	0.431607	not expressed	0.612467	not expressed	0.915831	not expressed	0.472391	not expressed	0.61029	not expressed	0.327961	sparse	0.55899		0.983471	not expressed	1.04552	not expressed	1.19338	not expressed	0.983745	not expressed	1.06542	not expressed	1.29636	not expressed	1.01507	not expressed	1.10828	not expressed	0.911687	not expressed	0.957637
81578098	Mybpc1-Cre	sagittal	0.665052	scattered	0.516166	scattered	0.468552	scattered	0.433551	na	0.703021	na	0.593168	scattered	0.397493	na	0.686992	na	0.666259	na	0.560878	na		na	0.516424	na	0.86289	scattered	0.65998	scattered	0.382209	na	0.209098	na		na	0.371626	na	0.670657	na	0.537053	na	0.790084	na	0.646113	scattered	0.582795	na	0.604399
100134126	Nefh-Cre	sagittal	1.25585	widespread	0.538651	widespread	1.07369	widespread	0.996088	na	1.32709	na	1.33855	widespread	1.20061	na	1.29569	na	1.20513	na	1.24736	na		na	1.27324	na	1.36263	widespread	1.4174	widespread	1.12794	na	1.0196	na		na	1.11761	na	1.47743	na	1.15149	na	1.51387	na	1.27563	widespread	1.54917	na	1.36539
100134125	Nefl-IRES-CreER	sagittal	0.900984	not expressed	0.540945	not expressed	0.630307	not expressed	0.605898	na	0.71749	na	1.02332	not expressed	0.766077	na	0.696244	na	0.686744	na	0.89339	na		na	0.485095	na	0.691975	not expressed	0.482805	not expressed	0.474834	na		na		na		na	0.7496	na	0.852576	na	0.917984	na	1.12837	not expressed	1.09864	na	1.12085
100132635	Nes-Cre	sagittal	1.27281	widespread	0.574058	widespread	1.05063	widespread	0.936472	na	1.41695	na	1.32594	widespread	1.26519	na	1.15492	na	1.0322	na	1.28425	na		na	1.40828	na	1.40577	widespread	1.43917	widespread	1.51654	na	1.46788	na		na	1.21991	na	1.2919	na	1.37901	na	1.36998	na	1.17352	widespread	1.4565	na	1.10637
183133699	Nkx2-CreERT2	coronal	0.75085	sparse	1.29657	not expressed	0.554531	not expressed	0.53075	not expressed	0.43738	not expressed	0.684519	not expressed	0.809122	not expressed	0.350964	not expressed	0.642638	not expressed	0.835349	not expressed	0.506178	not expressed	0.717418	not expressed	0.511549	not expressed	0.645985	not expressed	0.754483	not expressed	0.770952	not expressed	0.763637	not expressed	0.984967	not expressed	0.697291	not expressed	0.725649	not expressed	0.806305	not expressed	0.63677	not expressed	0.858902	not expressed	0.566946
148054777	Nos1-CreERT2	coronal	0.491706	sparse	0.300086	sparse	0.282708	sparse	0.331812	sparse	0.364026	sparse	0.284339	sparse	0.345466	sparse	0.27998	sparse	0.313751	sparse	0.312463	sparse		sparse	0.355459	sparse	0.499792	sparse	0.469021	sparse	0.438247	sparse	0.454661	sparse	0.647958	sparse	0.452703	sparse	0.438362	sparse	0.521946	sparse	0.571577	sparse	0.380914	sparse	0.555673	sparse	0.292313
100140743	Nr5a1-Cre	coronal	2.15986	laminar	1.28106	sparse	2.28799	laminar	1.55011	sparse	4.87963	laminar	6.25997	laminar	4.22108	laminar	4.92202	laminar	4.77147	laminar	3.98501	laminar		laminar	4.98536	laminar	2.06425	laminar, sparse	3.25575	laminar	2.73821	laminar, sparse	2.80201	laminar, sparse	1.70319	laminar, sparse	3.43592	laminar, sparse	2.17391	laminar, sparse	1.26556	laminar, sparse	2.35744	laminar, sparse	1.48504	laminar, sparse	0.417948	laminar, sparse	0.901868
286678848	Ntrk1-IRES-Cre	coronal	0.815938	sparse		sparse		sparse		sparse		sparse	1.54992e-06	sparse		sparse		sparse		sparse		sparse	0.00145289	sparse		not expressed		sparse		not expressed	0.490174	not expressed	0.38078	not expressed	1.66601	not expressed	0.283157	not expressed	0.839663	not expressed	1.11527	not expressed	0.895121	not expressed	1.13221	not expressed	1.05764	not expressed	1.43996
81709682	Ntsr1-Cre_GN220	sagittal	2.15342	laminar	0.662089	sparse	0.809395	laminar	0.817046	na	4.30034	na	4.68429	laminar	1.2283	na	1.89598	na	1.33472	na	1.84774	na		na	5.86239	na	1.66069	laminar, sparse	4.64182	laminar		na		na		na		na	6.1624	na	1.7075	na	8.48323	na	2.27198	laminar	2.72443	na	1.29796
293794731	Nxph4-2A-CreERT2	coronal	1.19081	laminar, sparse	1.8201	laminar, sparse	1.01558	laminar, sparse	0.90948	laminar, sparse	0.898098	laminar, sparse	1.25749	laminar, sparse	0.897618	laminar, sparse	1.00877	laminar, sparse	0.888609	laminar, sparse	1.90837	laminar, sparse	1.11626	laminar, sparse	1.14112	laminar, sparse	0.999156	laminar, sparse	1.25878	laminar, sparse	1.46203	laminar, sparse	1.51411	laminar, sparse	1.1238	laminar, sparse	1.58393	laminar, sparse	0.950394	laminar, sparse	0.779955	laminar, sparse	1.10759	laminar, sparse	0.922424	laminar, sparse	1.19442	laminar, sparse	1.14992
112608236	Otof-Cre	coronal	1.55154	enriched	0.908484	scattered	1.35168	scattered	1.65352	scattered	1.58925	enriched	1.33539	enriched	1.54137	enriched	1.3088	enriched	1.26329	enriched	1.36672	enriched		enriched	1.37074	enriched	1.65714	scattered	1.5163	scattered	1.35236	enriched	1.63553	enriched	1.92294	enriched	1.89441	enriched	0.839888	enriched	1.30109	enriched	1.61318	enriched	1.13907	enriched	1.84579	enriched	0.985268
146453082	Otof-CreERT2	coronal	0.934761	not expressed	1.22891	not expressed	0.72724	not expressed	0.697376	not expressed	0.652138	not expressed	0.729344	not expressed	0.852001	not expressed	0.629126	not expressed	0.697478	not expressed	0.914652	not expressed		not expressed	0.75993	not expressed	0.927852	not expressed	0.744434	not expressed	0.941272	not expressed	1.02046	not expressed	1.08313	not expressed	0.945046	not expressed	0.866288	not expressed	0.896436	not expressed	1.07738	not expressed	0.801255	not expressed	0.686461	not expressed	0.483213
100130928	Oxt-IRES-Cre	coronal	0.984372	not expressed		not expressed	0.552171	not expressed	0.752805	not expressed	0.346889	not expressed	0.607696	not expressed	0.760495	not expressed	0.336384	not expressed	0.485761	not expressed	0.900463	not expressed		not expressed	0.543694	not expressed	0.348799	not expressed	0.51	not expressed	0.847814	not expressed	0.890758	not expressed	1.07998	not expressed	0.805407	not expressed	0.89902	not expressed	0.856639	not expressed	0.947577	not expressed	0.849405	not expressed	0.799151	not expressed	0.74029
292137827	Oxtr-Cre_ON66	coronal	1.2925	enriched		enriched	1.34974	enriched	1.4821	enriched	1.02433	enriched	1.41584	enriched	1.22133	enriched	0.880171	enriched	1.16882	enriched	1.3874	enriched	0.938452	enriched	1.47719	enriched	0.673941	enriched	1.56642	enriched	1.50008	enriched	1.58853	enriched	1.81162	enriched	1.66561	enriched	1.45997	enriched	1.37534	enriched	1.34806	enriched	1.34269	enriched	1.32259	enriched	1.2663
181447071	Pcdh9-Cre_NP276	sagittal	1.01054	not expressed	4.96904	not expressed	0.429429	not expressed	0.462937	na	0.82155	na	0.709917	not expressed	0.659107	na	0.565097	na	0.566691	na	0.792939	na	0.441304	na	0.445646	na	0.850891	not expressed	0.481235	not expressed	0.64812	na		na		na		na	0.76159	na	0.937541	na	0.930741	na	0.784135	not expressed	0.848608	na	0.769261
81268758	Pcp2-Cre (AM)	sagittal	1.38146	enriched	1.23402	enriched	0.819014	enriched	1.2996	na	0.825668	na	0.724079	scattered	0.662953	na	0.737288	na	0.630224	na	0.723375	na		na	0.75022	na	0.717068	sparse	0.561014	sparse	0.865193	na	0.698338	na		na	0.710247	na	2.64284	na	2.08321	na	3.67537	na	2.34739	enriched	2.97218	na	2.22522
100130929	Pcp2-Cre_GN135	sagittal	0.452371	not expressed	0.335837	not expressed	0.257794	not expressed	0.262142	na	0.355639	na	0.42389	not expressed	0.351087	na	0.252458	na	0.285895	na	0.319028	na		na	0.383811	na	0.306272	not expressed	0.345124	not expressed	0.714465	na	0.65539	na		na	0.445436	na	0.632963	na	0.314991	na	0.950261	na	0.426237	not expressed	0.618876	na	0.3821
112608143	Pdzk1ip1-Cre_KD31	sagittal	0.687482	not expressed	0.403048	not expressed	0.421822	not expressed	0.319578	na	0.601077	na	0.515438	not expressed	0.430422	na	0.618901	na	0.491049	na	0.507871	na		na	0.506215	na	0.753077	not expressed	0.613319	not expressed	0.678058	na		na		na		na	0.949261	na	0.603665	na	0.910305	na	0.54482	not expressed	0.584528	na	0.674273
161161952	Penk-2A-CreERT2	coronal	0.736429	not expressed		not expressed	0.467437	not expressed	0.563694	not expressed	0.628968	not expressed	0.628041	not expressed	0.674189	not expressed	0.460383	not expressed	0.550248	not expressed	0.764243	not expressed		not expressed	0.590513	not expressed	0.362086	not expressed	0.571744	not expressed	0.961331	not expressed	1.08034	not expressed	0.829594	not expressed	0.95148	not expressed	0.979645	not expressed	1.07248	not expressed	1.01079	not expressed	0.849739	not expressed	0.802547	not expressed	0.7476
286681929	Plxnd1-Cre_OG1	coronal	1.28593	enriched	0.596926		1.3983	enriched	1.359	enriched	1.58086	enriched	1.35121	enriched	1.65305	enriched	1.66937	enriched	1.69982	enriched	1.30127	enriched	1.57676	enriched	1.53314	enriched	2.08843	enriched	1.58386	enriched	1.32376	enriched	1.54115	enriched	1.53887	enriched	1.37729	enriched	1.10455	enriched	0.861569	enriched	1.22515	enriched	0.897612	enriched	0.92879	enriched	0.641009
100112869	Pmch-Cre	coronal	0.697703	not expressed	0.201507	not expressed	0.483894	not expressed	0.548381	not expressed	0.407115	not expressed	0.535076	not expressed	0.625198	not expressed	0.383107	not expressed	0.478799	not expressed	0.534802	not expressed		not expressed	0.556781	not expressed	0.493526	not expressed	0.543352	not expressed	0.960703	not expressed	1.1457	not expressed	1.21076	not expressed	1.09495	not expressed	0.477591	not expressed	0.411786	not expressed	0.765763	not expressed	0.470831	not expressed	0.551444	not expressed	0.403482
112607326	Pnmt-Cre	coronal	2.98627	enriched	1.66945	enriched	3.08234	enriched	2.72427	enriched	3.94431	enriched	3.55432	enriched	3.44974	enriched	3.75423	enriched	3.57825	enriched	3.09548	enriched		enriched	4.21266	enriched	4.03756	enriched	4.5973	enriched	3.84831	enriched	4.13763	enriched	4.3247	enriched	4.11578	enriched	3.49608	enriched	2.95911	enriched	3.67185	enriched	2.52067	enriched	2.52412	enriched	1.18988
100095107	Pomc-Cre (BL)	coronal	0.713814	not expressed		not expressed	0.376029	not expressed	0.50265	not expressed	0.141335	not expressed	0.308201	not expressed	0.487966	not expressed	0.11805	not expressed	0.323928	not expressed	0.577725	not expressed		not expressed	0.336097	not expressed	0.284536	not expressed	0.458622	not expressed	0.557588	not expressed	0.663496	not expressed	0.426197	not expressed	0.790698	not expressed	0.662145	not expressed	0.6991	not expressed	0.45238	not expressed	0.594041	not expressed	0.391959	not expressed	0.907488
111190904	Pomc-Cre (ST)	sagittal	1.106	laminar, sparse	0.445861	not expressed	0.484708	laminar, sparse	0.671955	na	1.32515	na	1.34835	laminar, sparse	0.557426	na	1.11334	na	0.765256	na	0.869082	na		na	1.61718	na	1.01717	not expressed	2.00817	not expressed	1.3332	na		na		na		na	2.18592	na	0.844886	na	2.54109	na	1.37332	not expressed	1.9122	na	1.01118
286681715	Ppp1r17-Cre_NL146	coronal	0.615821	scattered		scattered	0.586524	scattered	0.612922	scattered	0.173667	scattered	0.535116	scattered	0.579585	scattered	0.242346	scattered	0.442835	scattered	0.568663	scattered	0.595305	scattered	0.483452	enriched	0.0687489	scattered	0.331724	enriched	0.731003	scattered	0.779235	scattered	0.796584	scattered	0.845418	scattered	0.714835	scattered	0.729558	scattered	0.753112	scattered	0.675807	scattered	0.547969	scattered	0.692947
292138042	Prkcd-GluCla-CFP-IRES-Cre	coronal	0.727283	enriched		sparse	0.545553	scattered	0.416341	scattered	0.115157	enriched	0.619332	enriched	0.56035	enriched	0.0916568	enriched	0.353602	enriched	0.754418	enriched	0.967214	enriched	0.544146	enriched	0.0336411	enriched	0.327318	enriched	1.05515	enriched	1.09775	enriched	1.11186	enriched	1.10417	enriched	1.04218	enriched	1.08306	enriched	1.0682	enriched	0.87903	enriched	0.446449	enriched	0.686238
111190665	Pvalb-2A-Cre	coronal	0.817869	enriched		sparse	0.720461	enriched	0.683762	sparse	0.882447	enriched	1.13006	enriched	1.17117	enriched	0.772579	enriched	1.001	enriched	1.106	enriched		enriched	0.992591	enriched	0.54695	scattered	0.759344	sparse	0.945862	scattered	0.877358	scattered	0.782251	scattered	0.848671	scattered	0.953583	scattered	1.00663	scattered	0.749683	scattered	0.755813	scattered	0.507806	scattered	0.433333
182682109	Pvalb-2A-CreERT2	coronal	0.930997	scattered	0.377403	scattered	1.08075	scattered	0.975674	scattered	1.44356	scattered	1.24789	scattered	1.09926	scattered	1.30351	scattered	1.18907	scattered	1.10367	scattered	1.31161	scattered	1.19071	scattered	0.888328	sparse	0.987114	scattered	1.01008	scattered	1.00959	scattered	0.828007	scattered	0.906766	scattered	0.937042	scattered	0.949984	scattered	0.802447	scattered	0.74908	scattered	0.462192	scattered	0.492511
131032129	Pvalb-2A-dCre	coronal	1.09589	scattered		scattered	0.818701	sparse	0.918315	sparse	0.771831	scattered	1.25211	scattered	1.39968	scattered	0.592078	scattered	1.03149	scattered	1.07983	scattered	0.614557	scattered	1.19212	scattered	0.611259	sparse	1.10111	scattered	1.16001	scattered	1.1856	scattered	1.13529	scattered	1.07685	scattered	1.28439	scattered	1.39336	scattered	1.51784	scattered	1.24672	scattered	1.23901	scattered	0.916191
100132638	Pvalb-CreERT2	sagittal	0.859241	sparse	0.320085	sparse	0.362569	sparse	0.461355	na	0.888166	na	0.88197	sparse	0.533886	na	0.442845	na	0.548539	na	0.7496	na		na	0.747143	na	0.444522	sparse	0.57767	sparse	1.24706	na	0.954817	na		na	1.08041	na	1.50994	na	0.877104	na	1.83538	na	1.1967	sparse	1.55036	na	0.929537
81709692	Pvalb-IRES-Cre	coronal	0.96793	scattered	0.527488	scattered	1.12808	scattered	1.07711	scattered	1.51505	scattered	1.25834	scattered	1.21125	scattered	1.43205	scattered	1.28564	scattered	1.03409	scattered		scattered	1.18584	scattered	1.13942	sparse	1.10877	scattered	1.07704	scattered	1.09492	scattered	0.835488	scattered	1.0078	scattered	1.00301	scattered	0.896536	scattered	0.906783	scattered	0.842485	scattered	0.763448	scattered	0.814236
266886951	Rasgrf2-2A-dCre	coronal	1.28909	enriched	1.29288	enriched	1.45624	enriched	1.35355	enriched	0.922079	enriched	1.23268	enriched	1.67612	enriched	0.878854	enriched	1.45188	enriched	1.38111	enriched	1.30838	enriched	1.39164	enriched	1.19044	enriched	1.39763	enriched	1.6367	enriched	1.73255	enriched	1.98611	enriched	1.58279	enriched	1.57363	enriched	1.36415	enriched	1.46692	enriched	1.239	enriched	0.474666	enriched	0.441194
117285137	Rbp4-Cre_KL100	coronal	2.29658	laminar	0.535975	laminar	2.62312	laminar	2.76611	laminar	1.6615	laminar	1.71475	laminar	2.63049	laminar	1.56582	laminar	1.87663	laminar	2.37138	laminar	2.20488	laminar	1.76877	laminar	1.77025	laminar	1.62325	laminar	2.12889	laminar	2.3882	laminar	2.01755	laminar	2.25987	laminar	2.48497	laminar	2.31663	laminar	2.16622	laminar	1.59803	laminar	1.07219	laminar	0.670845
264030251	Rorb-IRES2-Cre	coronal	2.51668	enriched	0.688552	scattered	1.11568	sparse	0.807017	sparse	4.78897	enriched	4.25666	enriched	2.03438	enriched	3.36123	enriched	2.51412	enriched	1.95841	enriched	1.98739	enriched	3.36949	enriched	3.90222	enriched	4.22738	enriched	2.34266	enriched	2.93277	enriched	3.1636	enriched	2.67183	enriched	3.23229	enriched	2.46273	enriched	3.16451	enriched	3.50851	enriched	3.19995	enriched	1.84573
159116544	Satb2-Cre_MO23	sagittal	3.73978	widespread	0.541899	widespread	2.5352	widespread	2.49962	na	5.3773	na	4.12872	widespread	2.0558	na	2.96726	na	2.75319	na	2.8419	na		na	5.50276	na	4.50273	widespread	5.32454	widespread	5.94453	na	4.91044	na		na	5.19964	na	4.17568	na	1.52902	na	5.26485	na	2.64415	widespread	2.60213	na	2.29553
81578112	Scnn1a-Tg1-Cre	sagittal	1.07595	enriched	0.66734	widespread	0.708916	widespread	0.586255	na	1.61582	na	1.35513	enriched	0.741601	na	1.22335	na	0.97111	na	0.799023	na		na	1.28905	na	1.37897	widespread	1.3026	widespread	1.09393	na	1.0613	na		na	1.23432	na	1.04969	na	0.58558	na	1.30879	na	0.893114	enriched	1.35387	na	0.625089
81268764	Scnn1a-Tg2-Cre	coronal	0.902635	enriched	0.885184	not expressed	0.771849	not expressed	0.752167	not expressed	1.22398	enriched	0.991609	enriched	0.681386	laminar, sparse	1.03169	enriched	0.820969	laminar, sparse	0.655699	not expressed		laminar, sparse	0.973922	laminar, sparse	0.971705	sparse	1.20869	sparse	0.822699	not expressed	0.920447	not expressed	0.873026	not expressed	0.935902	not expressed	0.562765	sparse	0.370878	not expressed	0.82526	sparse	0.689899	sparse	1.06961	sparse	0.759061
81709690	Scnn1a-Tg3-Cre	coronal	0.597356	laminar	0.12077	sparse	0.35799	sparse	0.306535	sparse	1.73058	laminar	1.51004	laminar	0.629257	laminar	1.47095	laminar	1.11912	laminar	0.746945	sparse		laminar	1.00124	laminar	0.882604	sparse	0.945935	laminar	0.553124	laminar	0.63039	laminar	0.347575	laminar	0.506594	laminar	0.787253	laminar	0.819767	laminar	0.580784	laminar	0.875849	laminar	0.281092	laminar	0.453587
100134089	Sim1-Cre	coronal	0.437306	laminar	0.174698	not expressed	0.976034	laminar	1.27451	laminar	0.387357	laminar, sparse	0.622338	laminar, sparse	0.823089	laminar, sparse	0.482178	laminar, sparse	0.759111	laminar, sparse	0.379662	laminar, sparse		laminar, sparse	0.361074	laminar, sparse	0.199709	laminar, sparse	0.325999	laminar, sparse	0.54997	laminar, sparse	0.41878	laminar, sparse	0.15818	laminar, sparse	0.35571	laminar, sparse	0.502819	laminar, sparse	0.369673	laminar, sparse	0.154936	laminar, sparse	0.213166	laminar, sparse	0.0372576	laminar, sparse	0.0442447
293794088	Sim1-Cre_KJ18	coronal	1.19782	laminar		laminar	1.71207	laminar	1.45355	laminar	1.32227	laminar	1.81089	laminar	2.0346	laminar	2.02783	laminar	2.41977	laminar	2.05808	laminar	1.59089	laminar	1.36263	laminar	0.663706	sparse	1.02096	laminar, sparse	1.1407	laminar, sparse	0.951258	laminar, sparse	1.09606	laminar, sparse	0.79763	sparse	1.21966	laminar, sparse	1.30708	laminar, sparse	1.11593	laminar, sparse	1.06194	laminar, sparse	0.680235	laminar, sparse	1.1191
100095124	Six3-Cre	sagittal	1.31004	enriched	0.924588	scattered	0.910458	scattered	0.774302	na	2.04743	na	2.03916	enriched	1.40232	na	1.4646	na	1.24724	na	1.52345	na		na	1.11396	na	1.67399	scattered	1.09552	enriched	1.49644	na		na		na		na	1.67393	na	1.32142	na	1.36689	na	1.09184	enriched	1.12701	na	1.3959
100112813	Slc17a6-IRES-Cre	sagittal	1.58935	widespread	0.708983	widespread	1.38426	widespread	1.24975	na	1.78473	na	1.70083	widespread	1.51564	na	1.45661	na	1.49612	na	1.55048	na		na	1.72547	na	1.63187	widespread	1.7374	widespread	1.77754	na	1.8173	na		na	1.94989	na	1.83656	na	1.28751	na	1.9967	na	1.50982	widespread	1.48169	na	1.05044
286681500	Slc17a7-IRES2-Cre	coronal	2.72408	widespread		widespread	2.72427	widespread	2.571	widespread	2.44305	widespread	2.81906	widespread	2.92811	widespread	2.40666	widespread	2.61354	widespread	2.99585	widespread	2.71937	widespread	2.86467	widespread	2.71556	widespread	2.98834	widespread	2.7781	widespread	2.91467	widespread	3.06189	widespread	3.05446	widespread	2.60067	widespread	2.71869	widespread	2.8151	widespread	2.2739	widespread	2.27187	widespread	1.90125
100141751	Slc17a8-iCre	coronal	1.46228	not expressed		not expressed	1.49199	not expressed	1.92276	not expressed	1.33372	not expressed	1.41198	not expressed	2.03302	not expressed	1.09749	not expressed	1.48566	not expressed	2.34389	not expressed		not expressed	1.05197	not expressed	0.649229	not expressed	0.893996	not expressed	1.41026	not expressed	1.51428	not expressed	1.93959	not expressed	1.48736	not expressed	1.50052	not expressed	1.2567	not expressed	2.04048	not expressed	1.52432	not expressed	1.26191	not expressed	1.2637
174685737	Slc18a2-Cre_OZ14	coronal	1.57141	laminar, sparse	0.506811	not expressed	2.1428	not expressed	1.36797	not expressed	2.13948	laminar, sparse	1.26213	laminar, sparse	1.16568	laminar, sparse	2.49023	laminar, sparse	1.88951	laminar, sparse	0.82563	laminar, sparse	2.42085	laminar, sparse	1.72161	laminar, sparse	3.01883	not expressed	1.75173	not expressed	0.805669	not expressed	0.967981	not expressed	0.430732	not expressed	1.27774	not expressed	0.658684	not expressed	0.493848	not expressed	0.341198	not expressed	0.433316	not expressed	0.436039	not expressed	0.405399
100112814	Slc32a1-IRES-Cre	sagittal	0.911987	scattered	1.2482	scattered	0.633978	scattered	0.718901	na	0.905976	na	0.893228	scattered	0.66967	na	0.717818	na	0.668759	na	0.684637	na		na	1.04301	na	0.952407	scattered	1.12801	scattered	0.977178	na	0.890052	na	0.756761	na	0.992672	na	0.868695	na	0.641226	na	0.959959	na	0.675095	scattered	0.938243	na	0.66311
111202482	Slc6a3-Cre	coronal	0.897573	sparse	0.87118	sparse	1.10954	sparse	1.2119	sparse	1.46646	sparse	0.699842	sparse	0.891932	sparse	1.14133	sparse	0.988101	sparse	1.20583	sparse		sparse	0.693874	sparse	1.35318	sparse	0.632123	sparse	0.633864	sparse	0.655894	sparse	0.630282	sparse	0.78483	sparse	0.569379	sparse	0.585405	sparse	0.646343	sparse	0.466979	sparse	0.438554	sparse	0.431778
100134105	Slc6a4-Cre_ET33	coronal	0.535875	laminar, sparse	0.246644	not expressed	0.506489	not expressed	0.609067	not expressed	0.599621	not expressed	0.457444	not expressed	0.674801	not expressed	0.353195	not expressed	0.47243	not expressed	0.439683	not expressed		not expressed	0.473799	not expressed	0.311825	not expressed	0.436715	not expressed	0.717973	not expressed	0.797431	not expressed	0.202988	not expressed	0.907274	not expressed	0.553745	not expressed	0.609112	not expressed	0.119822	not expressed	0.325055	not expressed	0.123885	not expressed	0.220146
100134100	Slc6a4-CreERT2_EZ13	coronal	0.655759	not expressed	1.04099	not expressed	0.529424	not expressed	0.592455	not expressed	0.456951	not expressed	0.49672	not expressed	0.873253	not expressed	0.569638	not expressed	0.785179	not expressed	0.522078	not expressed		not expressed	0.446597	not expressed	0.353661	not expressed	0.369819	not expressed	0.643775	not expressed	0.627757	not expressed	1.1614	not expressed	0.461359	not expressed	1.15051	not expressed	0.879499	not expressed	0.988671	not expressed	0.863041	not expressed	1.18963	not expressed	0.438122
100134095	Slc6a5-Cre_KF109	coronal	0.246223	not expressed		not expressed	0.18815	not expressed	0.168259	not expressed	0.18299	not expressed	0.284357	not expressed	0.366555	not expressed	0.120454	not expressed	0.261706	not expressed	0.208889	not expressed		not expressed	0.299638	not expressed	0.166999	not expressed	0.248511	not expressed	0.274631	not expressed	0.267219	not expressed	0.249889	not expressed	0.229675	not expressed	0.311104	not expressed	0.400424	not expressed	0.322059	not expressed	0.270171	not expressed	0.147163	not expressed	0.124311
182271059	Snap25-IRES2-Cre	sagittal	1.37997	widespread	0.834607	widespread	1.12998	widespread	0.980375	na	1.53642	na	1.45913	widespread	1.24381	na	1.40702	na	1.29817	na	1.37279	na	1.26577	na	1.41924	na	1.59751	widespread	1.51687	widespread	0.945332	na		na		na		na	1.50526	na	1.46847	na	1.49237	na	1.52636	widespread	1.76725	na	1.75227
159116254	Sst-Cre	coronal	0.839989	sparse		sparse	0.591582	sparse	0.672238	sparse	0.404332	sparse	0.463317	sparse	0.48095	sparse	0.461748	sparse	0.578267	sparse	0.579117	sparse		sparse	0.377551	sparse	0.326121	sparse	0.414594	sparse	0.732191	sparse	0.649072	sparse	0.827526	sparse	0.568073	sparse	0.789687	sparse	0.702112	sparse	0.620892	sparse	0.539732	sparse	0.361861	sparse	0.311225
111196783	Sst-CreERT2	coronal	1.51885	not expressed		not expressed	1.29206	not expressed	1.49985	not expressed	1.07435	not expressed	1.48935	not expressed	2.19043	not expressed	1.2681	not expressed	1.81998	not expressed	1.49085	not expressed		not expressed	1.25204	not expressed	0.969445	not expressed	1.14439	not expressed	1.9912	not expressed	2.03306	not expressed	1.60022	not expressed	1.48052	not expressed	1.58056	not expressed	1.70694	not expressed	2.00134	not expressed	1.66544	not expressed	2.68125	not expressed	1.36697
159123971	Sst-IRES-Cre	coronal	0.722885	scattered	0.28281	scattered	0.649404	scattered	0.569288	scattered	0.789255	scattered	0.753769	scattered	0.748716	scattered	0.701034	scattered	0.721327	scattered	0.704783	scattered		scattered	0.827845	scattered	0.952476	scattered	0.965536	scattered	0.739952	scattered	0.760682	scattered	0.634635	scattered	0.875198	scattered	0.593188	scattered	0.415314	scattered	0.607207	scattered	0.413443	scattered	0.269446	scattered	0.397581
100126206	Syn1-Cre	sagittal	1.22432	widespread	0.490017	widespread	0.93778	widespread	0.996427	na	1.70164	na	1.63528	widespread	0.845171	na	1.50976	na	1.17357	na	0.973637	na		na	1.49487	na	1.73013	widespread	1.0314	widespread		na		na		na		na	1.57796	na	0.913728	na		na	0.996646	widespread	1.73712	na	0.656486
174685094	Syt17-Cre_NO14	coronal	1.5759	laminar		not expressed	1.09371	not expressed	1.28414	not expressed	1.44432	not expressed	0.924424	not expressed	1.50791	not expressed	1.16155	not expressed	1.24466	not expressed	1.10581	not expressed	0.858963	not expressed	1.01394	not expressed	1.3018	not expressed	1.3054	not expressed	0.951638	not expressed	1.08163	not expressed	1.93825	not expressed	1.17061	not expressed	1.17949	not expressed	1.25613	not expressed	1.18131	not expressed	1.11171	not expressed	1.09794	not expressed	0.852928
100138021	Syt6-Cre_KI148	coronal	1.25219	laminar	0.653638	sparse	2.3315	laminar	1.81852	laminar	1.36497	laminar	0.930608	laminar	3.11578	laminar	1.84684	laminar	2.10174	laminar	2.07755	laminar	1.33369	laminar	0.527882	laminar	1.12327	not expressed	0.304324	sparse	0.639636	laminar	0.545997	laminar	0.332444	laminar	0.462415	sparse	0.614264	laminar	1.73161	laminar	0.41969	laminar	0.590715	laminar	0.251633	laminar	0.286603
148055282	Tac1-IRES2-Cre	coronal	0.781174	scattered	1.2964	scattered	0.750409	scattered	0.625883	scattered	0.855246	scattered	0.730757	scattered	0.851287	scattered	0.757554	scattered	0.739163	scattered	0.829933	scattered	0.663209	scattered	0.947931	scattered	1.12717	scattered	1.01995	scattered	0.626418	scattered	0.665826	scattered	0.585542	scattered	0.832083	scattered	0.48057	scattered	0.586699	scattered	0.381264	scattered	0.33392	scattered	0.147989	scattered	0.282613
180308889	Tac2-IRES2-Cre	coronal	0.896148	not expressed		not expressed	0.71087	not expressed	0.715479	not expressed	0.483764	not expressed	0.745238	not expressed	0.59033	not expressed	0.76138	not expressed	0.616578	not expressed	0.696689	not expressed	0.796347	not expressed	0.683959	not expressed	0.41485	not expressed	0.653976	not expressed	1.39085	not expressed	1.54598	not expressed	1.18022	not expressed	1.45265	not expressed	1.0626	not expressed	1.11842	not expressed	1.22438	not expressed	1.08584	not expressed	0.878858	not expressed	1.10919
182019748	Th-Cre_FI172	coronal	0.593559	sparse		sparse	0.394465	sparse	0.567257	sparse	0.344888	sparse	0.289315	sparse	0.491759	sparse	0.261674	sparse	0.274176	sparse	0.56888	sparse	0.278701	sparse	0.349026	sparse	0.33487	sparse	0.360955	sparse	0.438897	sparse	0.461696	sparse	0.712328	sparse	0.47024	sparse	0.408382	sparse	0.512701	sparse	0.785016	sparse	0.513806	sparse	0.204489	sparse	0.450108
100140724	Th-IRES-CreER	coronal	1.71067	not expressed	4.08091	not expressed	1.30015	not expressed	1.41561	not expressed	0.727289	not expressed	1.59489	not expressed	1.45133	not expressed	0.71518	not expressed	1.12159	not expressed	1.97672	not expressed		not expressed	0.935906	not expressed	0.495945	not expressed	0.790007	not expressed	2.34345	not expressed	2.35159	not expressed	2.19169	not expressed	1.93226	not expressed	1.67154	not expressed	2.0964	not expressed	1.84218	not expressed	1.56414	not expressed	1.24464	not expressed	1.3351
293794517	Tlx3-Cre	coronal	0.902151	scattered	1.45603	scattered	0.850109	scattered	0.86284	scattered	0.351718	scattered	0.690297	scattered	0.960543	scattered	0.571113	scattered	0.71706	scattered	0.809942	scattered	0.830734	scattered	0.61607	scattered	0.544801	scattered	0.721992	scattered	1.00768	scattered	1.06418	scattered	1.37009	scattered	1.00124	scattered	0.951671	scattered	0.979659	scattered	1.11117	scattered	0.891603	scattered	0.956188	scattered	0.799784
113099772	Trib2-2A-CreERT2	sagittal	0.786506	enriched	0.998654	enriched	0.743043	enriched	0.673546	na	0.755384	na	0.737326	enriched	0.656862	na	0.82906	na	0.735021	na	0.660737	na	0.818221	na	0.684647	na	1.06956	enriched	1.03191	enriched	0.494747	na		na		na		na	1.03569	na	0.49265	na	1.1298	na	0.545355	enriched	0.700309	na	0.50682
100142457	Ucn3-Cre_KF43	coronal	0.779719	laminar		not expressed	0.667926	not expressed	0.951205	not expressed	0.632995	not expressed	0.56757	not expressed	0.79968	not expressed	0.408823	not expressed	0.599202	not expressed	0.992832	not expressed		not expressed	0.478751	not expressed	0.329359	not expressed	0.419014	not expressed	0.604539	not expressed	0.606521	not expressed	0.406374	not expressed	0.687479	not expressed	0.484095	not expressed	0.524994	not expressed	0.397475	not expressed	0.37119	not expressed	0.315308	not expressed	0.230368
100140723	Vamp2-IRES-CreER	sagittal	1.07707	scattered	0.686411	scattered	0.600678	scattered	0.606388	na	0.910367	na	1.02472	scattered	0.659568	na	0.823083	na	0.625667	na	0.837005	na		na	1.08492	na	0.991344	scattered	1.04826	scattered	1.46665	na	1.49697	na		na	1.34356	na	1.28258	na	1.00624	na	1.3386	na	0.957332	scattered	1.00699	na	0.934899
180308453	Vip-IRES-Cre	coronal	1.67625	enriched	0.686944	enriched	1.58791	enriched	1.49	enriched	1.36942	enriched	1.48102	enriched	1.58583	enriched	1.33504	enriched	1.53516	enriched	1.63856	enriched	1.60494	enriched	1.51535	enriched	1.59335	enriched	1.65562	enriched	1.85214	enriched	1.93921	enriched	2.45675	enriched	1.62534	enriched	1.91107	enriched	1.91184	enriched	1.63537	enriched	1.64133	enriched	1.45977	enriched	0.988387
159123542	Vipr2-Cre_KE2	coronal	1.52134	widespread	0.376094	widespread	1.53977	widespread	1.29493	widespread	1.72772	widespread	1.60381	widespread	1.51941	widespread	1.68734	widespread	1.57144	widespread	1.71683	widespread		widespread	1.61012	widespread	1.7837	widespread	1.69424	widespread	1.60469	widespread	1.64542	widespread	1.32539	widespread	1.6932	widespread	1.53126	widespread	1.67233	widespread	1.44194	widespread	1.3708	widespread	1.01399	widespread	1.18429
159123178	Wfs1-Tg2-CreERT2	sagittal	1.47128	enriched	0.596839	enriched	1.60204	enriched	1.4183	na	1.52326	na	1.85006	enriched	1.65223	na	2.60448	na	2.00354	na	1.92401	na		na	1.03101	na	2.56772	enriched	1.72743	enriched	0.573723	na	0.392479	na		na	0.282855	na	1.47506	na	1.61688	na	0.872235	na	1.76915	enriched	1.67362	na	1.23656
100095112	Wfs1-Tg3-CreERT2	sagittal	1.36745	not expressed	1.47777	not expressed	0.824234	not expressed	0.926604	na	2.34358	na	0.978447	not expressed	0.645869	na	1.30674	na	0.569956	na	0.710652	na		na	2.20558	na	2.78597	not expressed	3.23684	not expressed	0.840306	na		na		na		na	0.903919	na	0.887515	na	0.786617	na	0.767749	not expressed	0.870147	na	0.95648
100141719	Wnt3a-IRES-Cre	sagittal	0.161083	sparse	0.150322	not expressed	0.086086	sparse	0.122032	na	0.0551089	na	0.0535256	not expressed	0.095986	na	0.0508456	na	0.0480072	na	0.0981083	na		na	0.0648866	na	0.0679307	not expressed	0.0681579	not expressed		na		na		na		na	0.0442625	na	0.185358	na		na	0.114046	not expressed	0.0760071	na	0.251516
[truncated: 567 more columns]
